# Supplementary material
Source: PubMed Central journal article supplement (PMC5115731)

## Supporting Information for

### 2-Aryl-5-carboxytetrazole as a New Photoaffinity Label for Drug Target Identification

András Herner,<sup>†,1</sup> Jasmina Marjanovic,<sup>‡,1</sup> Tracey M. Lewandowski,<sup>†</sup> Violeta Marin,<sup>‡</sup> Melanie Patterson,<sup>‡</sup> Laura Miesbauer,<sup>‡</sup> Damien Ready,<sup>‡</sup> Jon Williams,<sup>‡</sup> Anil Vasudevan<sup>‡,\*</sup> and Qing Lin<sup>†,\*</sup>

<sup>†</sup>Department of Chemistry, State University of New York at Buffalo, Buffalo, New York 14260-3000, United States; <sup>‡</sup>Discovery Chemistry and Technology, AbbVie Inc., North Chicago, IL 60064-6101, United States; <sup>1</sup> These authors contributed equally to this work.

E-mail: qinglin@buffalo.edu, anil.vasudevan@abbvie.com

## Table of Contents

### Supplemental Tables and Figures

|                                                                                                                                      |         |
|--------------------------------------------------------------------------------------------------------------------------------------|---------|
| <b>Figure S1.</b> HPLC-based study of quenching of ACT in acetonitrile/PBS (1:1).....                                                | S2-S3   |
| <b>Table S1.</b> Kinome profiling of the Dasatinib probes.....                                                                       | S4-S5   |
| <b>Table S2.</b> Binding affinity and cell proliferation data for the JQ-1 probes .....                                              | S6      |
| <b>Figure S2.</b> Labeling of recombinant BTK protein by Dasatinib probes .....                                                      | S7      |
| <b>Figure S3.</b> Labeling of recombinant BTK protein by Dasatinib probes in K562 cell lysate ...                                    | S7      |
| <b>Figure S4.</b> Labeling of recombinant BRD4 protein by JQ-1 probes .....                                                          | S8      |
| <b>Figure S5.</b> Labeling of recombinant BRD4 protein by JQ-1 probes in K562 cell lysate.....                                       | S8      |
| <b>Figure S6.</b> HPLC and LC-MS analyses of the photoactivation of <b>1a</b> and <b>2a</b> in PBS .....                             | S9-S10  |
| <b>Figure S7.</b> Inhibition of the ligand-dependent target cross-linking by the ACT-based probes as monitored by LC-MS .....        | S11     |
| <b>Figure S8.</b> Concentration-dependent cross-linking of BRD4 protein by probe <b>4a</b> .....                                     | S12     |
| <b>Figure S9.</b> Model studies of the quenching reactions of ACT .....                                                              | S13-S18 |
| <b>Figure S10.</b> Model studies of the quenching of diaryltetrazole by glutamic acid.....                                           | S18-S20 |
| <b>Figure S11.</b> Western blot detection of the targets after the photoaffinity enrichment .....                                    | S21     |
| <b>Table S3.</b> Kinases identified by LC-MS/MS using the photoaffinity labels <b>1a</b> and <b>2a</b> .....                         | S22     |
| <b>Table S4.</b> Proteins identified by LC-MS/MS using the photoaffinity labels <b>4a</b> and <b>5a</b> .....                        | S23     |
| <b>Table S5.</b> Comparison of kinase targets identified by probes <b>1a/2a</b> from this study with those from the literature.....  | S24-S25 |
| <b>Table S6.</b> Comparison of protein targets identified by probes <b>4a/5a</b> from this study with those from the literature..... | S25     |
| <b>General Information</b> .....                                                                                                     | S26     |
| <b>Experimental Procedures and Characterization Data</b> .....                                                                       | S26-S37 |
| <b><sup>1</sup>H and <sup>13</sup>C NMR Spectra</b> .....                                                                            | S38-S49 |

a)

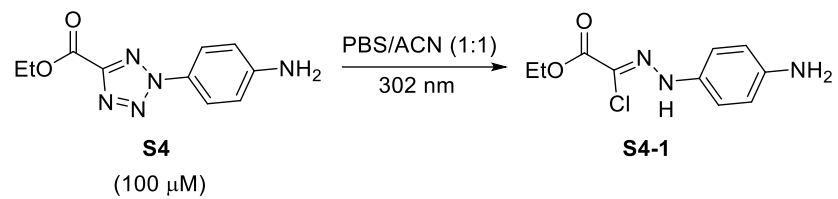

b)

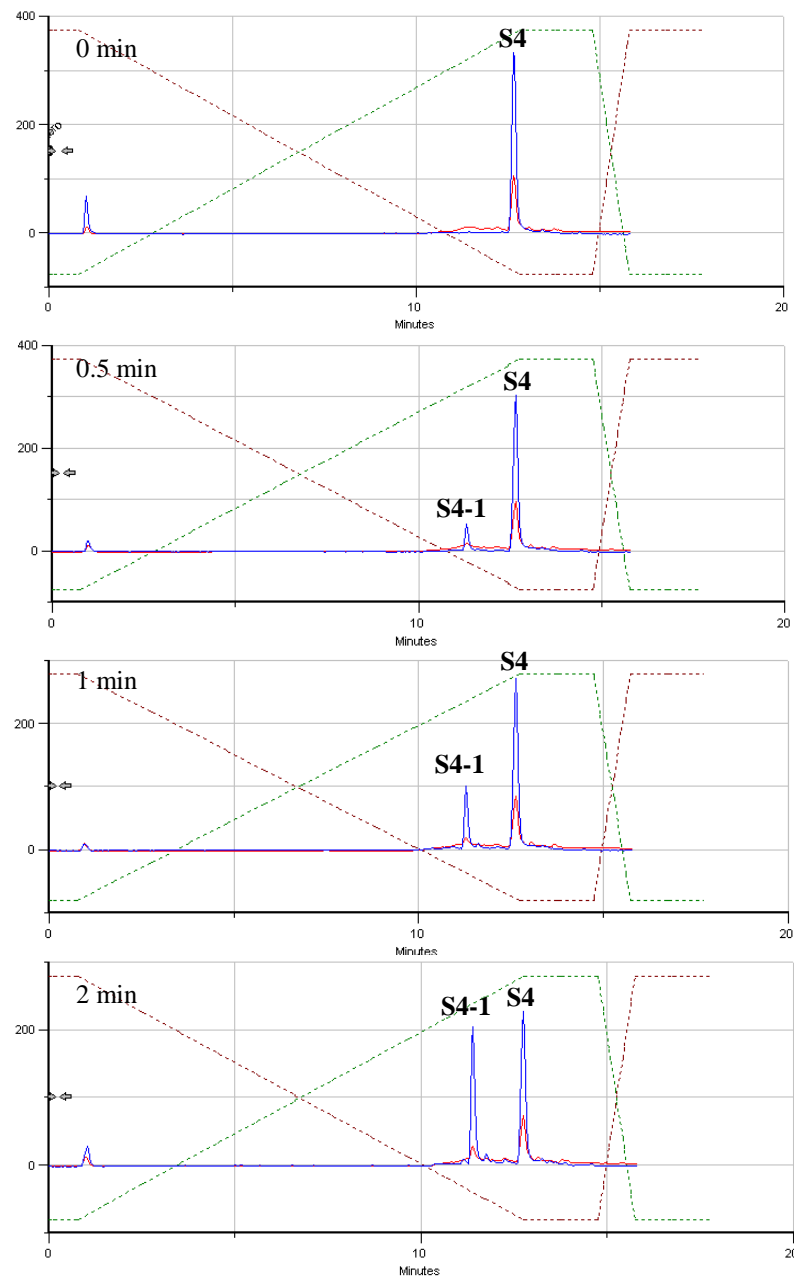

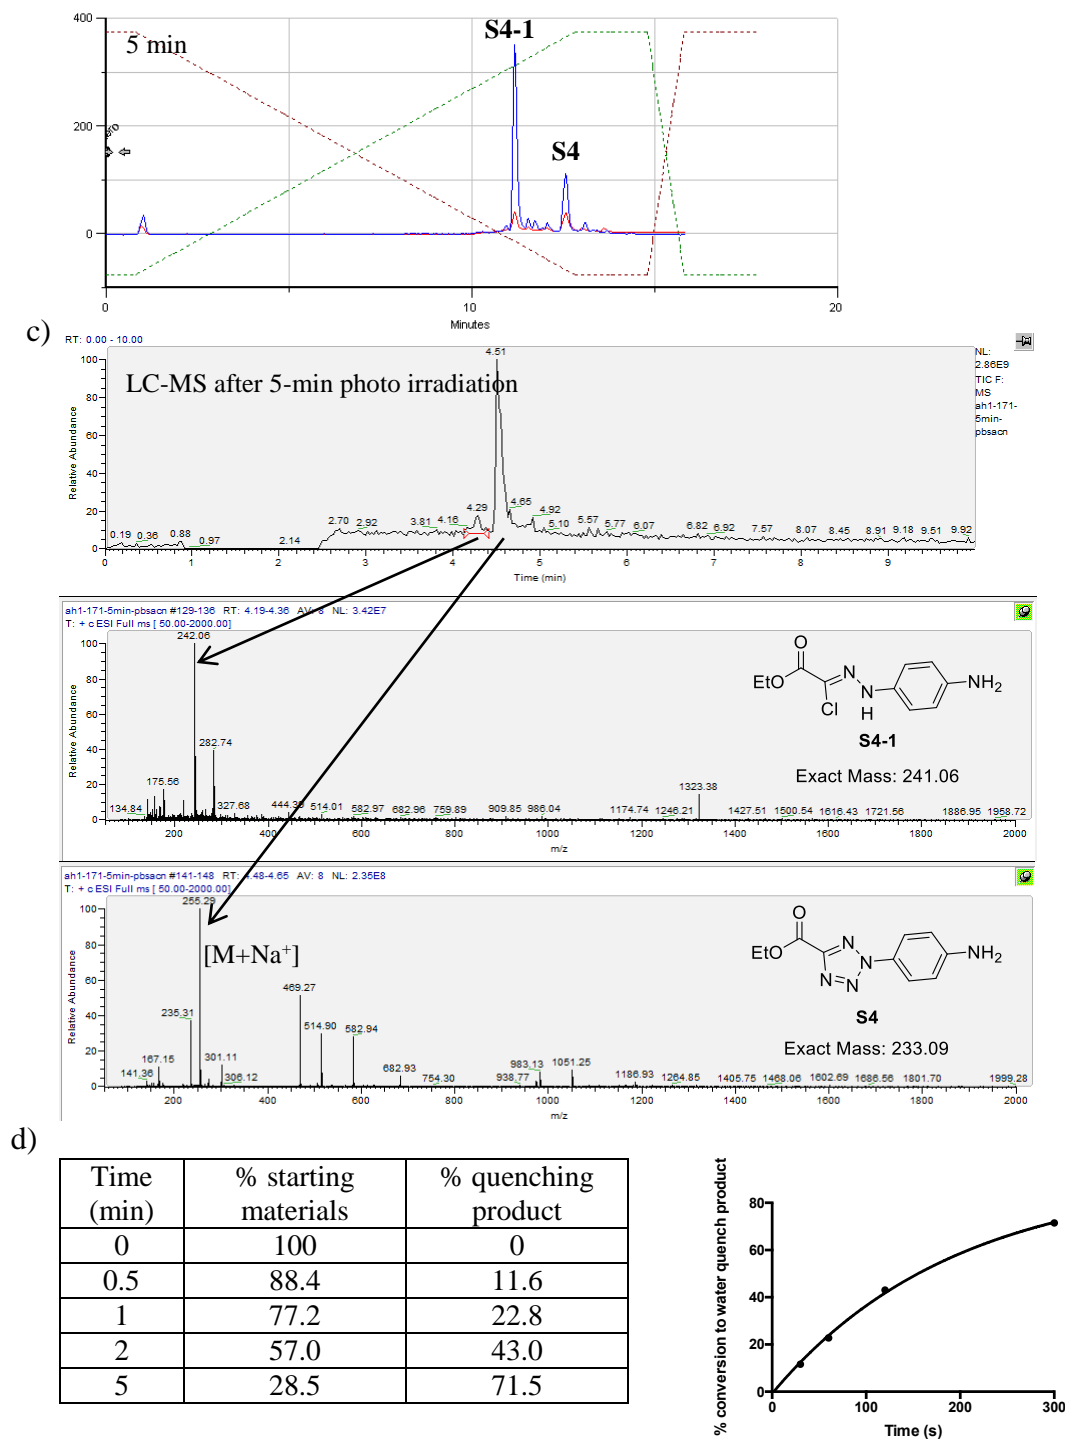

**Figure S1.** HPLC-based study of the medium-quenching of ACT **S4** (100  $\mu$ M) in acetonitrile/PBS (1:1, 70 mM  $\text{Cl}^-$ , pH 7.5) under 302 nm photoirradiation. (a) Reaction scheme. (b) Time course of the quenching reaction after 0, 0.5, 1, 2, and 5-min photoirradiation monitored by reverse-phase HPLC. Red traces = absorbance at 254 nm; blue traces = absorbance at 365 nm. (c) Plot of percent conversion vs. photoirradiation time. The data were fitted to an exponential rise to maximum equation using:  $y = (y_0 - a)e^{-k_{\text{obs}}t} + a$ , to give  $k_{\text{obs}} = 0.005178 \pm 0.0013 \text{ s}^{-1}$ , with  $R^2 = 0.9988$ .

**Table S1.** Kinome profiling of the Dasatinib probes.

| kinase                         | <b>Das</b> | <b>1a</b> | <b>1b</b> | <b>2a</b> | <b>2b</b> | <b>3a</b> | <b>3b</b> |
|--------------------------------|------------|-----------|-----------|-----------|-----------|-----------|-----------|
| <b>Abl</b>                     | 0.0004     | 0.0020    | 0.0007    | 0.0004    | 0.0004    | 0.0077    | 0.0036    |
| <b>ACVR1</b>                   | 0.122      | 4.6900    | 0.2580    | 4.3300    | 0.4400    | 4.6900    | 4.6900    |
| <b>Akt1</b>                    | 5.01       | 4.0700    | 4.0700    | 4.0700    | 4.0700    | 4.0700    | 4.0700    |
| <b>ALK</b>                     | 5.79       | 4.7700    | 4.7700    | 4.7700    | 4.7700    | 4.7700    | 4.7700    |
| <b>AUR1</b>                    | 2.81       | 5.5100    | 5.5100    | 5.5100    | 5.5100    | 5.5100    | 5.5100    |
| <b>AUR2</b>                    | 4.98       | 4.9800    | 2.9900    | 4.9800    | 4.9800    | 4.9800    | 4.9800    |
| <b>BRAF</b>                    | 0.022      | 0.4090    | 0.0909    | 0.1120    | 0.0473    | 2.5000    | 2.5000    |
| <b>BTk</b>                     | 0.0005     | 0.0067    | 0.0034    | 0.0014    | 0.0014    | 0.0613    | 0.2260    |
| <b>CAMK1D</b>                  | 5.48       | 5.4800    | 4.0200    | 5.4800    | 5.4800    | 5.4800    | 5.4800    |
| <b>CAMK2A</b>                  | 3.63       | 3.6300    | 3.6300    | 3.6300    | 3.6300    | 3.6300    | 3.6300    |
| <b>CAMKK2</b>                  | 4.96       | 4.9600    | 4.9600    | 4.9600    | 4.9600    | 4.9600    | 4.9600    |
| <b>CDK2</b>                    | 5.15       | 5.1500    | 5.1500    | 5.1500    | 5.1500    | NV        | NV        |
| <b>CDK7</b>                    | 5.05       | 5.0500    | 5.0500    | 5.0500    | 5.0500    | NV        | NV        |
| <b>CDK8</b>                    | 5          | 5.0000    | 5.0000    | 5.0000    | 5.0000    | 5.0000    | 5.0000    |
| <b>CDK9</b>                    | 1.91       | 3.5100    | 3.4600    | 4.8700    | 4.8700    | NV        | NV        |
| <b>Ck1 alpha1</b>              | 4.28       | 6.2500    | 6.2500    | 6.2500    | 6.2500    | 6.2500    | 6.2500    |
| <b>CLK2</b>                    | 3.84       | 4.6400    | 4.6400    | 4.6400    | 4.6400    | 4.6400    | 4.6400    |
| <b>cMET</b>                    | 4.93       | 4.0200    | 2.6000    | 4.9300    | 4.9300    | 4.9300    | 4.9300    |
| <b>CSF1R</b>                   | 0.000486   | 0.0014    | 0.0004    | 0.0004    | 0.0005    | 0.0120    | 0.0033    |
| <b>DDR1</b>                    | 0.0149     | 0.0137    | 0.0044    | 0.0023    | 0.0015    | 0.1100    | 0.0116    |
| <b>Dyrk1A</b>                  | 2.08       | 5.1200    | 4.9800    | 5.1200    | 5.1200    | 5.1200    | 5.1200    |
| <b>DYRK1B</b>                  | 3.56       | 3.5600    | 1.7100    | 3.5600    | 3.5600    | 3.5600    | 3.5600    |
| <b>EGFR</b>                    | 3.31       | 4.4900    | 2.4400    | 4.4900    | 2.0400    | 4.4900    | 4.4900    |
| <b>Erk2</b>                    | 5.93       | 5.3300    | 5.3300    | 5.3300    | 5.3300    | 5.3300    | NV        |
| <b>FAK</b>                     | 5.36       | 5.3600    | 5.3600    | 5.3600    | 5.3600    | 5.3600    | 5.3600    |
| <b>FGFR1</b>                   | 1.66       | 6.4400    | 2.5300    | 6.4400    | 6.4400    | 6.4400    | 6.4400    |
| <b>FLT1</b>                    | 2.21       | 5.3500    | 5.3500    | 5.3500    | 5.3500    | 5.3500    | 5.3500    |
| <b>Fyn</b>                     | 0.00049    | 0.0051    | 0.0013    | 0.0008    | 0.0009    | 0.0303    | 0.0166    |
| <b>GRK5</b>                    | 4.42       | 5.6000    | 4.0700    | 5.6000    | 5.6000    | 5.6000    | NV        |
| <b>GSK3<math>\alpha</math></b> | 4.87       | 4.8700    | 4.8700    | 4.8700    | 4.8700    | 4.8700    | 4.8700    |
| <b>GSK3<math>\beta</math></b>  | 5.97       | 5.9700    | 5.9700    | 5.9700    | 5.9700    | 5.9700    | 5.9700    |
| <b>IGF1R</b>                   | 2.65       | 3.7200    | 3.7200    | 3.7200    | 3.7200    | 3.7200    | 3.7200    |
| <b>IKKE</b>                    | 4.73       | 4.7300    | 4.7300    | 4.7300    | 4.7300    | 4.7300    | 4.7300    |
| <b>InsR</b>                    | 3.78       | 7.0700    | 7.0700    | 7.0700    | 7.0700    | 7.0700    | 6.8400    |
| <b>JAK2</b>                    | 1.23       | 4.5900    | 3.8800    | 4.5900    | 2.8100    | 4.5900    | 4.5900    |
| <b>JAK3</b>                    | 2.63       | 4.9800    | 4.9800    | 4.9800    | 4.9800    | 4.9800    | 4.9800    |
| <b>JNK1</b>                    | 5.11       | 5.1100    | 5.1100    | 5.1100    | 5.1100    | 5.1100    | 5.1100    |
| <b>JNK2</b>                    | 6.68       | 6.6800    | 6.6800    | 6.6800    | 6.6800    | 6.6800    | 6.6800    |
| <b>Kdr</b>                     | 1.23       | 3.5400    | 3.5400    | 3.5400    | 3.5400    | 3.5400    | 3.5400    |
| <b>Lck</b>                     | 0.0004     | 0.0120    | 0.0042    | 0.0020    | 0.0014    | 0.0691    | 0.0588    |

|                     |          |        |        |        |        |        |        |
|---------------------|----------|--------|--------|--------|--------|--------|--------|
| <b>LTK</b>          | 2.77     | 4.2100 | 4.2800 | 4.2800 | 4.2800 | 4.2200 | 4.2800 |
| <b>MAP2K3</b>       | 3.1      | 4.0400 | 3.3200 | 4.0400 | 4.0400 | 4.0400 | NV     |
| <b>MAP3K10</b>      | 1.4      | 5.5300 | 5.5300 | 5.5300 | 5.5300 | 5.5300 | 5.5300 |
| <b>MAP4K1</b>       | 0.768    | 3.9900 | 3.6100 | 3.9900 | 3.9900 | 3.9900 | NV     |
| <b>MAP4K2</b>       | 1.07     | 2.3700 | 2.3700 | 2.3700 | 2.3700 | 2.3700 | 2.3700 |
| <b>MAP4K4</b>       | 3.09     | 4.9400 | 4.9400 | 4.9400 | 4.9400 | 4.9400 | 4.9400 |
| <b>MEK1</b>         | 0.696    | 4.8300 | 3.5200 | 4.8300 | 3.3500 | 4.8300 | NV     |
| <b>MEK2</b>         | 0.881    | 5.2800 | 5.2800 | 5.2800 | 4.8200 | 5.2800 | 5.2800 |
| <b>MST1</b>         | 2.66     | 3.6500 | 3.6500 | 3.6500 | 3.6500 | 3.6500 | 3.6500 |
| <b>Nek2</b>         | 1.88     | 5.1800 | 5.1800 | 5.1800 | 5.1800 | 5.1800 | 5.1800 |
| <b>p38 alpha</b>    | 0.0624   | 0.0387 | 0.0932 | 0.1480 | 0.0292 | 4.9500 | 0.2860 |
| <b>PAK4KD</b>       | 4.39     | 4.3900 | 4.3900 | 4.3900 | 3.6800 | 4.3900 | 4.3900 |
| <b>PDGFRA V561D</b> | 0.00273  | 0.0293 | 0.0067 | 0.0060 | 0.0052 | 0.2860 | 0.1550 |
| <b>PDGFRB</b>       | 0.00195  | 0.0155 | 0.0063 | 0.0063 | 0.0025 | 0.3110 | 0.6370 |
| <b>Pim1</b>         | 5.68     | 5.5900 | 5.5900 | 5.5900 | 5.5900 | 5.5900 | 5.5900 |
| <b>Pim2</b>         | 4.19     | 5.0200 | 5.0200 | 5.0200 | 5.0200 | 5.0200 | 5.0200 |
| <b>PKA</b>          | 4.89     | 4.8900 | 4.8900 | 4.8900 | 4.8900 | 4.8900 | 4.8900 |
| <b>PKC theta</b>    | 3.86     | 1.5100 | 3.8600 | 3.8600 | 3.8600 | 3.8600 | 3.8600 |
| <b>PKC zeta</b>     | 1.99     | 4.5800 | 4.5800 | 4.5800 | 4.5800 | 4.5800 | NV     |
| <b>PKG1A</b>        | 4        | 4.0000 | 4.0000 | 4.0000 | 4.0000 | 4.0000 | 4.0000 |
| <b>Plk3</b>         | 1.55     | 3.7000 | 3.7000 | 3.7000 | 3.7000 | 3.7000 | 3.7000 |
| <b>Prkcn</b>        | 3.73     | 2.7600 | 2.7600 | 2.7600 | 2.7600 | 2.7600 | NV     |
| <b>RET</b>          | 0.342    | 4.6000 | 1.2400 | 4.6000 | 1.4600 | 4.6000 | 4.6000 |
| <b>RIPK2</b>        | 0.0028   | 0.0243 | 0.0109 | 0.0065 | 0.0037 | 0.3920 | 0.1070 |
| <b>Rock1</b>        | 4.61     | 4.6100 | 4.6100 | 4.6100 | 4.6100 | 4.6100 | 4.6100 |
| <b>Rock2</b>        | 5.28     | 5.2800 | 5.2800 | NV     | 5.2800 | 4.8100 | 5.2800 |
| <b>Rsk2</b>         | 4.64     | 4.6400 | 4.6400 | 4.6400 | 4.6400 | 4.6400 | 4.6400 |
| <b>SGK1</b>         | 5.17     | 5.1700 | 5.1700 | 5.1700 | 5.1700 | 5.1700 | 5.1700 |
| <b>SIK1</b>         | 0.000565 | 0.0042 | 0.0027 | 0.0010 | 0.0006 | 0.0431 | 0.0921 |
| <b>Src</b>          | 0.000582 | 0.0051 | 0.0014 | 0.0009 | 0.0007 | 0.0316 | 0.0215 |
| <b>STK16</b>        | 4.6      | 4.6000 | 4.6000 | 4.6000 | 4.6000 | 4.6000 | 4.6000 |
| <b>STK33</b>        | 2.02     | 2.7000 | 2.7000 | 2.7000 | 2.7000 | 2.7000 | 2.7000 |
| <b>Syk CatDom</b>   | 0.343    | 3.3000 | 2.2400 | 3.3000 | 3.3000 | 3.3000 | 3.3000 |
| <b>TAOK2</b>        | 2.23     | 4.0000 | 2.0700 | 2.8400 | 0.5150 | 4.0000 | 4.0000 |
| <b>TBK1</b>         | 3.27     | 4.0400 | 4.0400 | 4.0400 | 4.0400 | 4.0400 | 4.0400 |
| <b>TNK2</b>         | 0.00192  | 0.0105 | 0.0047 | 0.0028 | 0.0033 | 0.1360 | 0.1800 |
| <b>TrkA</b>         | 4.71     | 4.7100 | 4.7100 | 4.7100 | 4.7100 | 4.7100 | 4.7100 |
| <b>TrkB</b>         | 5.3      | 5.3000 | 5.3000 | 5.3000 | 5.3000 | 5.3000 | 5.3000 |
| <b>TrkC</b>         | 3.44     | 4.6500 | 4.6500 | 4.6500 | 4.6500 | 4.6500 | 4.6500 |
| <b>TYRO3</b>        | 1.75     | 4.9800 | 3.3300 | 4.9800 | 4.6700 | 4.9800 | 4.9800 |
| <b>Wee1</b>         | 0.0635   | 0.4650 | 0.2640 | 0.4710 | 0.0445 | 4.4000 | 4.4000 |
| <b>Zipk</b>         | 5.41     | 5.7100 | 5.7100 | 5.7100 | 5.7100 | 5.7100 | NV     |

$K_i$  values are given in  $\mu$ M. Targets and off-targets are colored in blue. NV = no value.

**Table S2.** Binding affinity and cell proliferation data for the JQ-1 probes.

|           | Binding Assay<br>$K_i$ ( $\mu$ M) |       |       | Cell Proliferation Titer-Glo Assay<br>$IC_{50}$ ( $\mu$ M ) |                    |                |
|-----------|-----------------------------------|-------|-------|-------------------------------------------------------------|--------------------|----------------|
|           | BRD2                              | BRD3  | BRD4  | Human<br>MX-1                                               | Human<br>NCI-H1299 | Human<br>SKM-1 |
| (+)-JQ-1  | 0.006                             | 0.019 | 0.023 | 0.144                                                       | 0.192              | 0.064          |
| <b>4a</b> | 0.002                             | 0.004 | 0.004 | 1.380                                                       | 7.140              | 0.031          |
| <b>4b</b> | 0.007                             | 0.007 | 0.012 | 1.950                                                       | >10.000            | 0.110          |
| <b>5a</b> | 0.022                             | 0.019 | 0.055 | 1.51                                                        | 6.74               | 0.231          |
| <b>6a</b> | 0.006                             | 0.018 | 0.022 | 2.030                                                       | 0.911              | 0.067          |
| <b>6b</b> | 0.002                             | 0.014 | 0.002 | N/A                                                         | N/A                | N/A            |

N/A = not available.

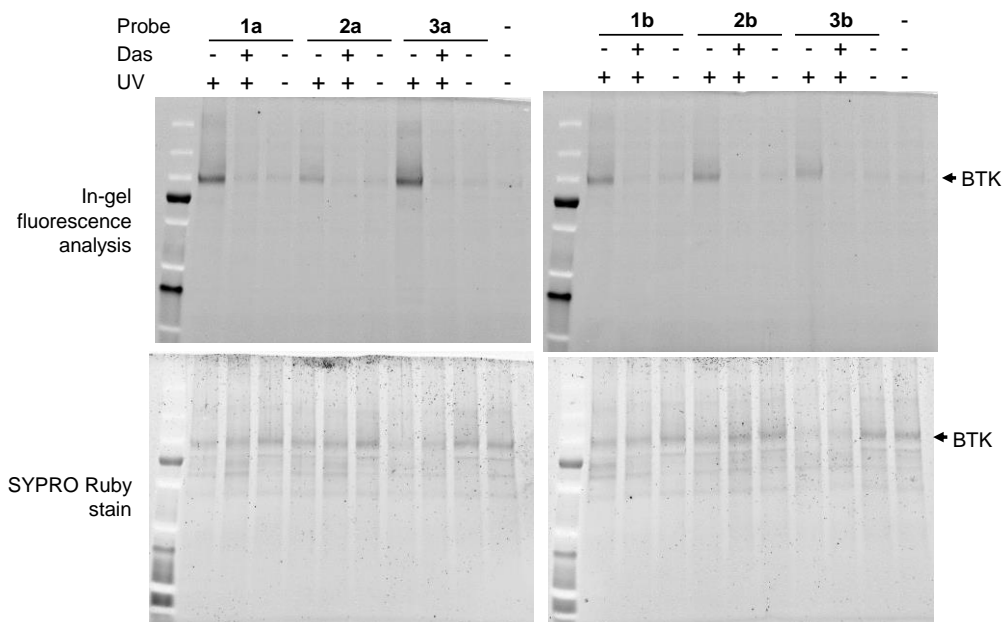

**Figure S2.** Full-size gel images of the labeling of recombinant BTK protein by the Dasatinib-derived photoaffinity probes.

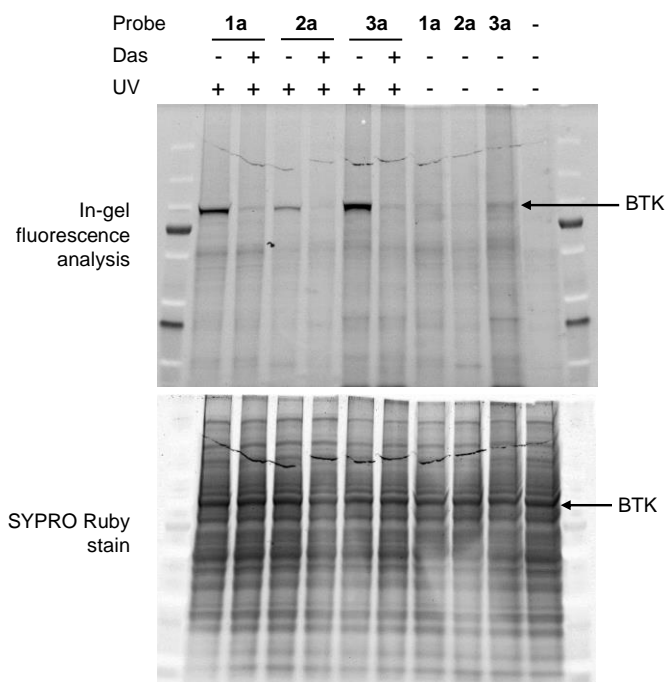

**Figure S3.** Selectively labeling of recombinant BTK protein by Dasatinib probes **1a**, **2a** and **3a** in the K562 cell lysate spiked with recombinant BTK protein. For the competition reactions, 0.2  $\mu$ M of photoaffinity probe and 10  $\mu$ M of Dasatinib were used.

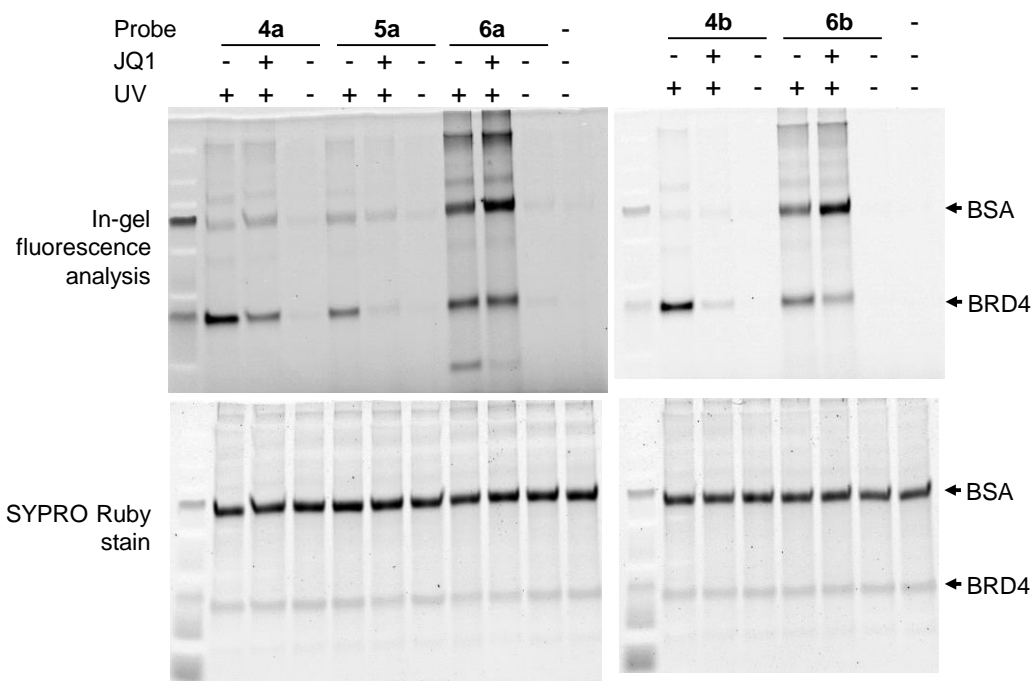

**Figure S4.** Full-size gel images of the labeling of recombinant BRD4 protein by the JQ-1-derived photoaffinity probes.

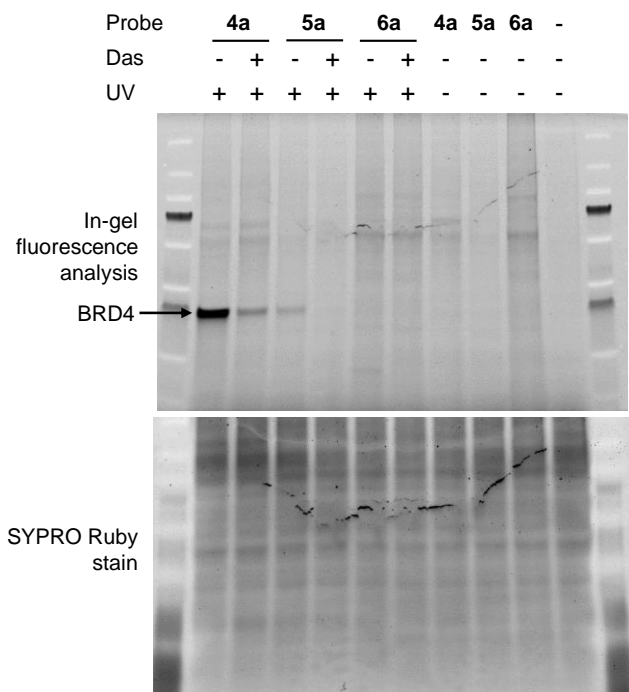

**Figure S5.** Labeling of recombinant BRD4 protein by JQ-1-derived photoaffinity probes **4a**, **5a** and **6a** in the K562 cell lysate spiked with recombinant BRD4 protein.

a)

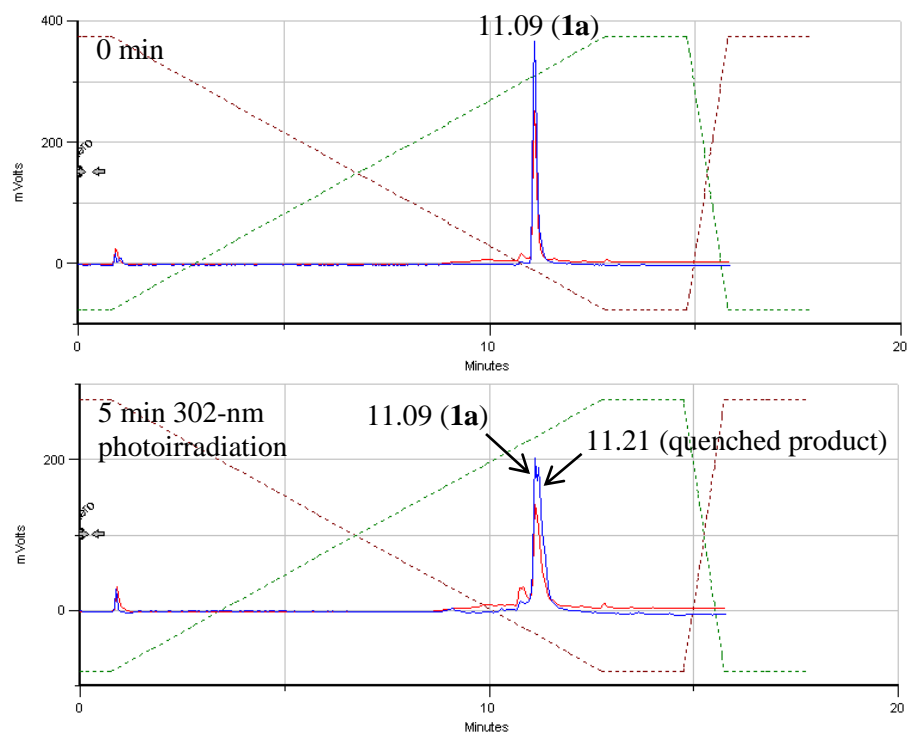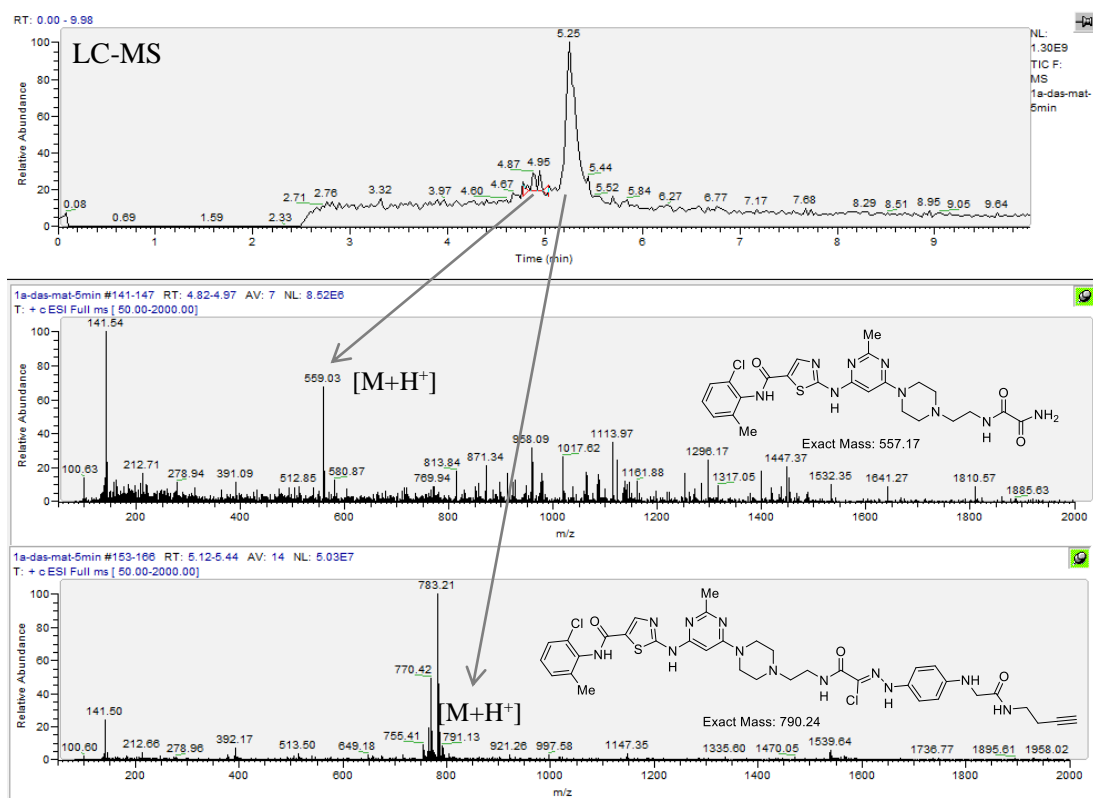

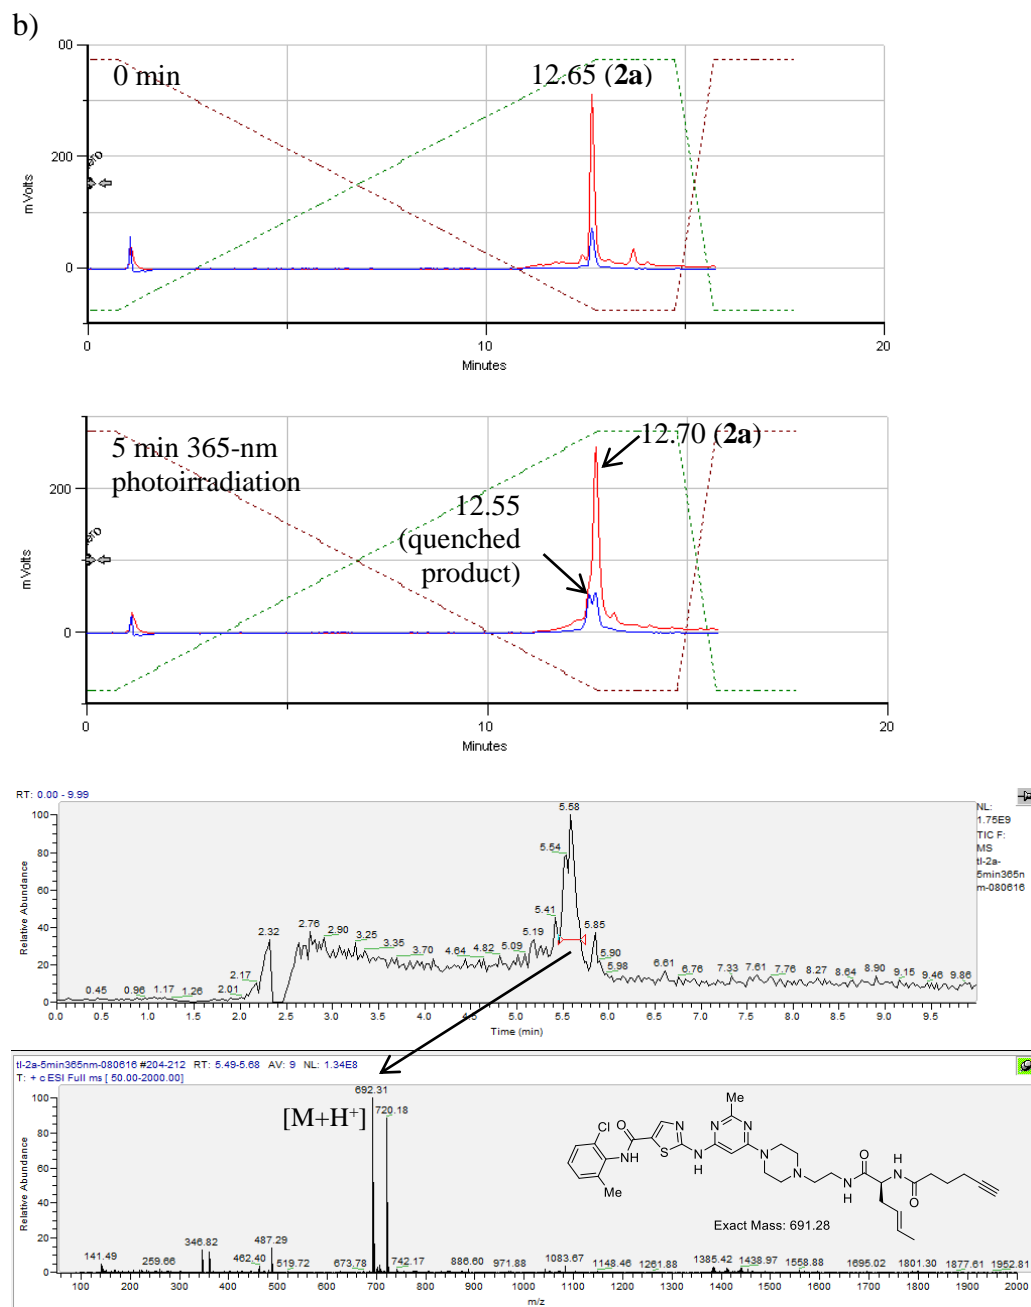

**Figure S6.** HPLC and LC-MS analyses of the photoactivation of (a) **1a** and (b) **2a** (100  $\mu$ M) in PBS. Red trace = absorbance at 254 nm; blue trace = absorbance a 365 nm. The percent conversion was calculated to be 38% for **1a** and 44% for **2a** based on absorbance at 365 nm.

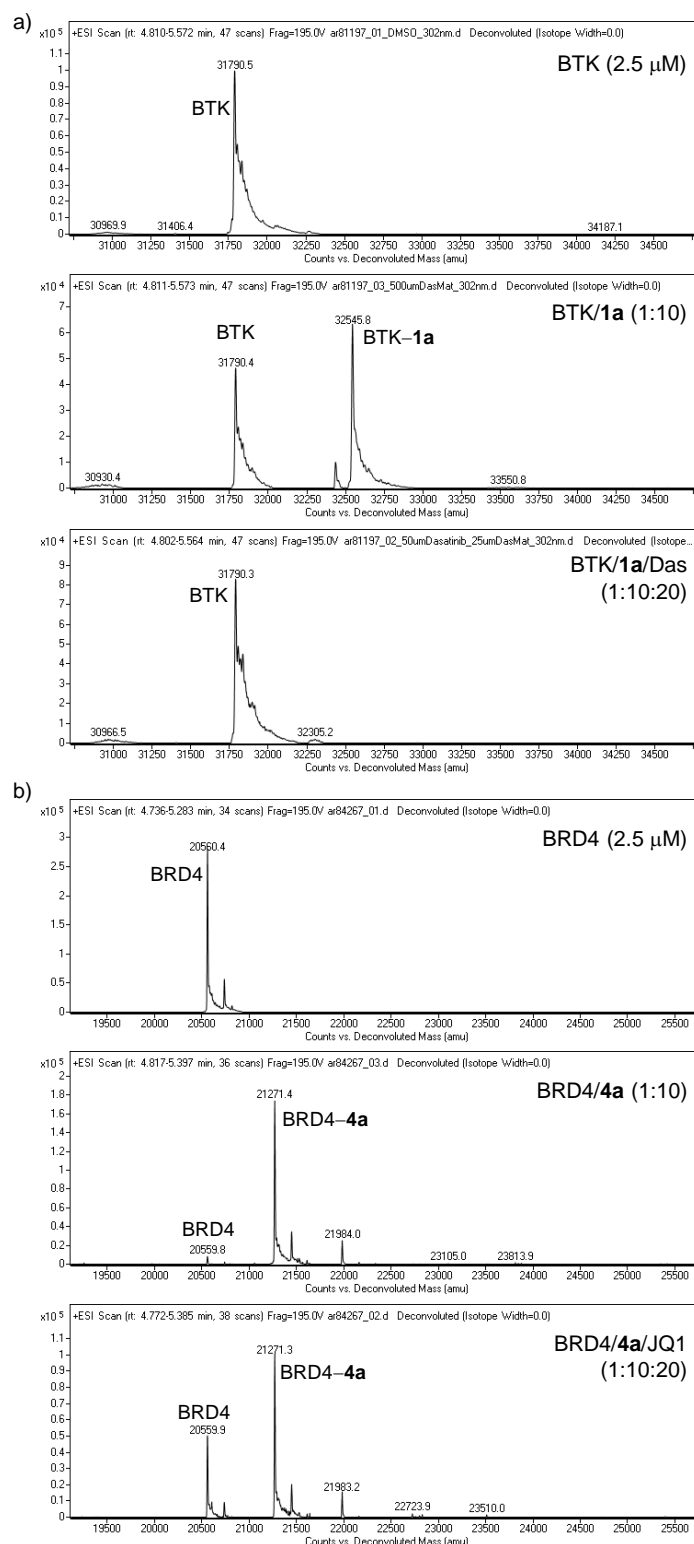

**Figure S7.** Inhibition of the ligand-dependent target cross-linking by the ACT-based probes as monitored by LC-MS. (a) Addition of Dasatinib (50  $\mu$ M) completely abolished the labeling of BTK (2.5  $\mu$ M) by probe **1a** (25  $\mu$ M). (b) Addition of JQ-1 (50  $\mu$ M) significantly reduced the labeling of BRD4 (2.5  $\mu$ M) by probe **4a** (25  $\mu$ M).

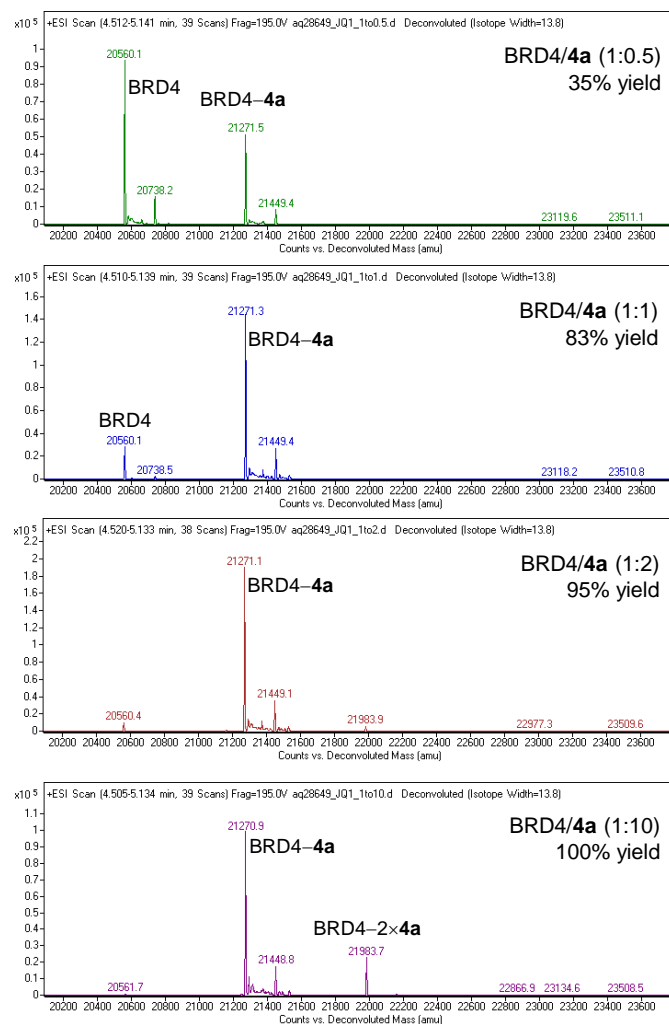

**Figure S8.** Concentration-dependent cross-linking of recombinant BRD4 protein by probe **4a** as monitored by LC-MS. The concentration of BRD4 used in the reactions was 2.5  $\mu$ M.

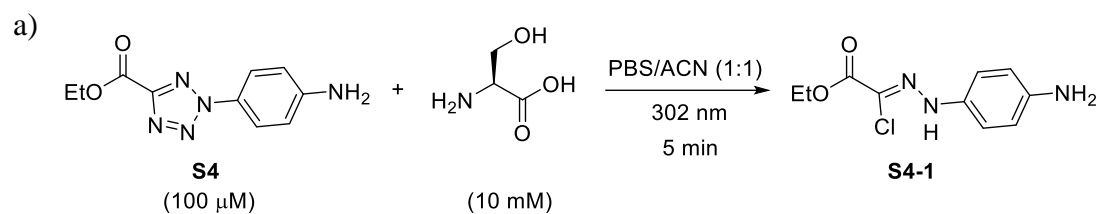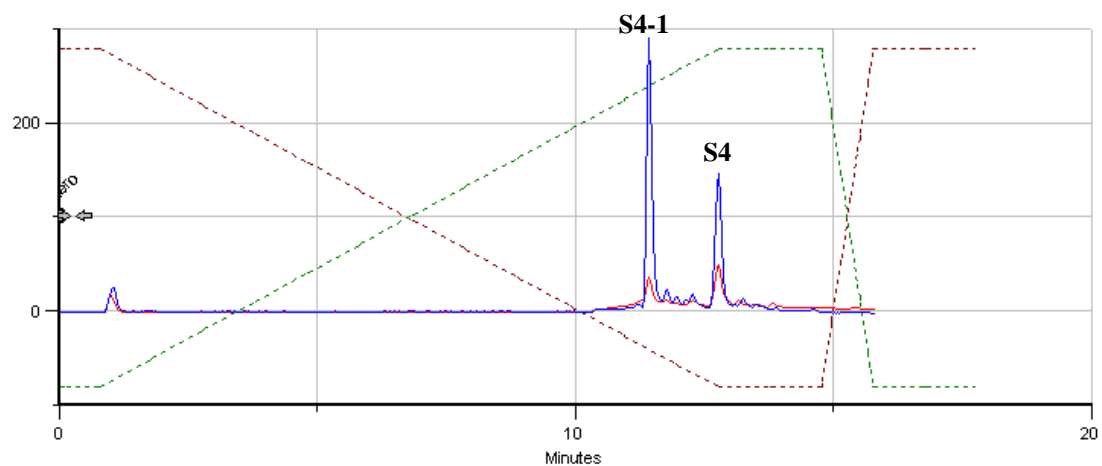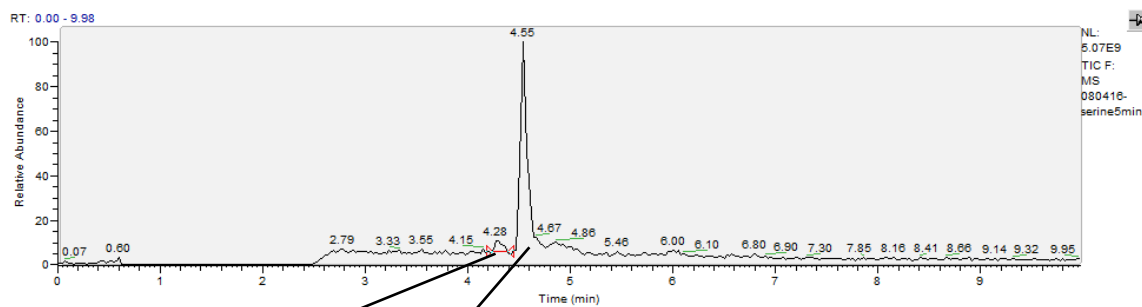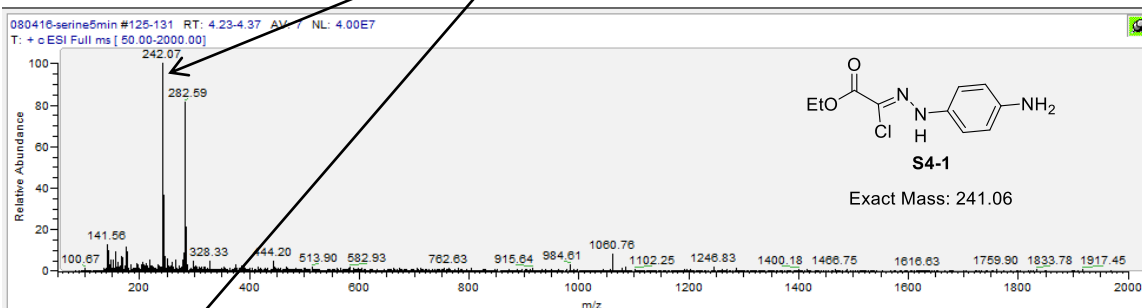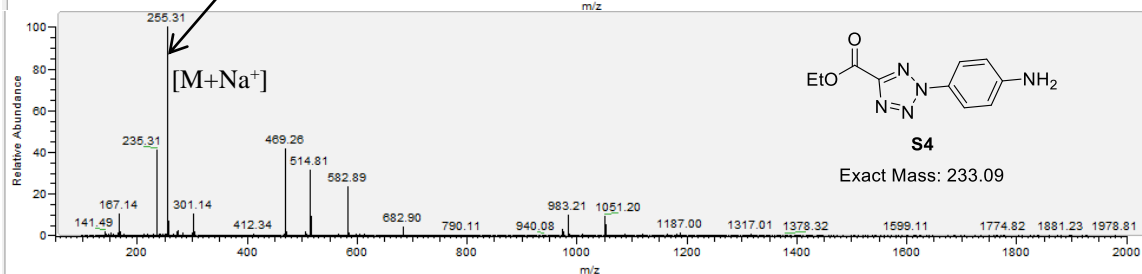

b)

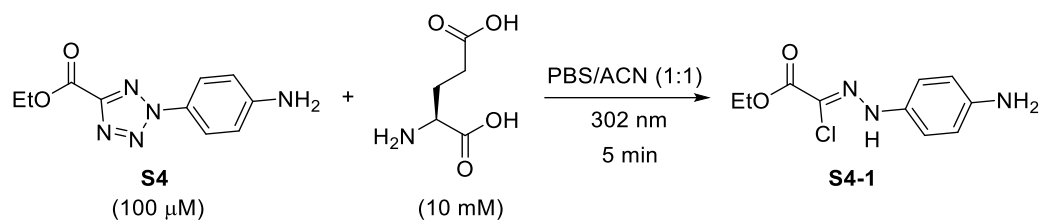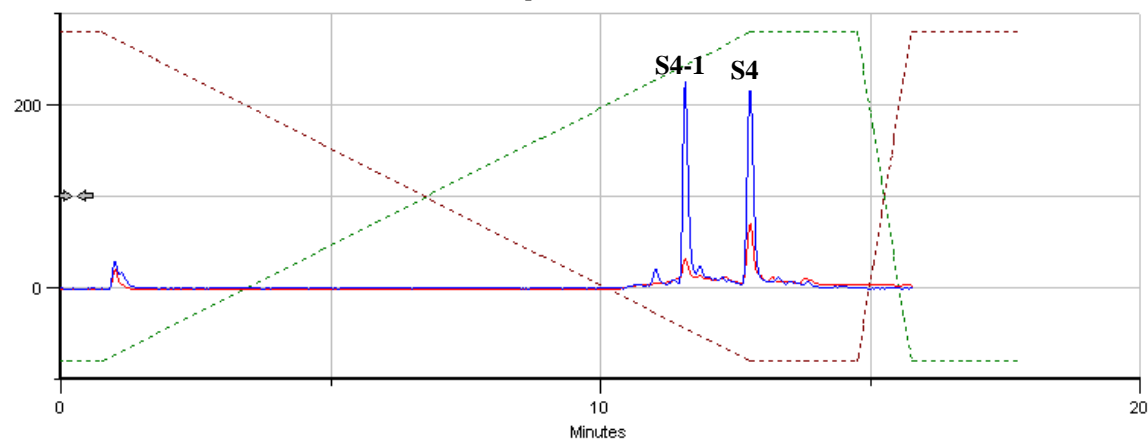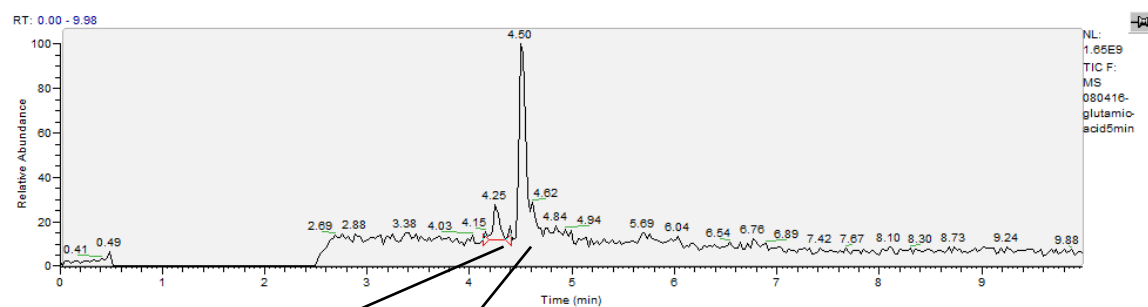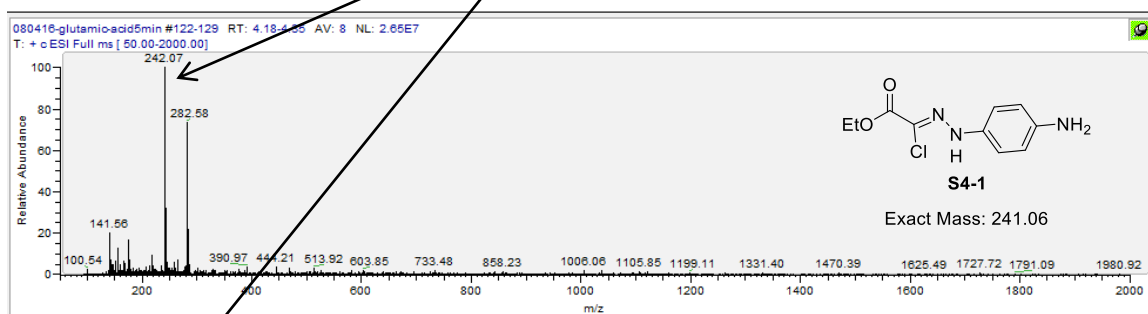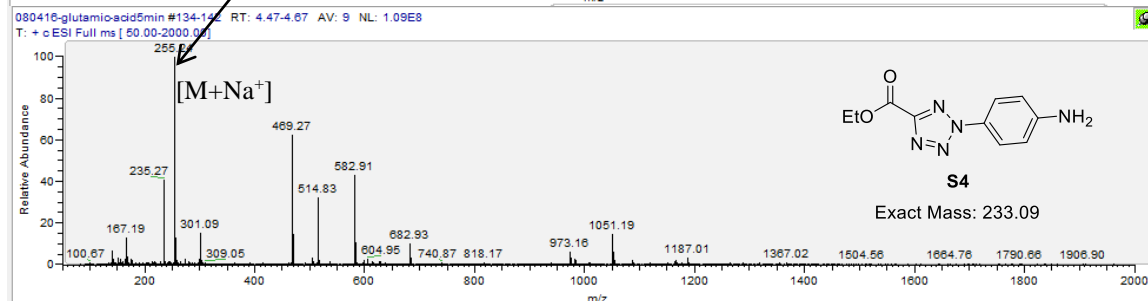

c)

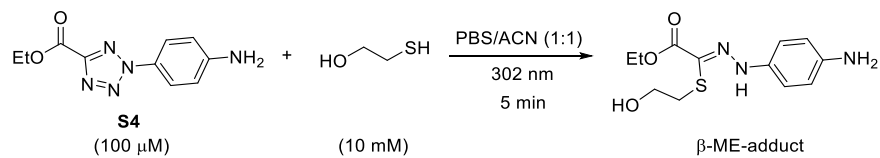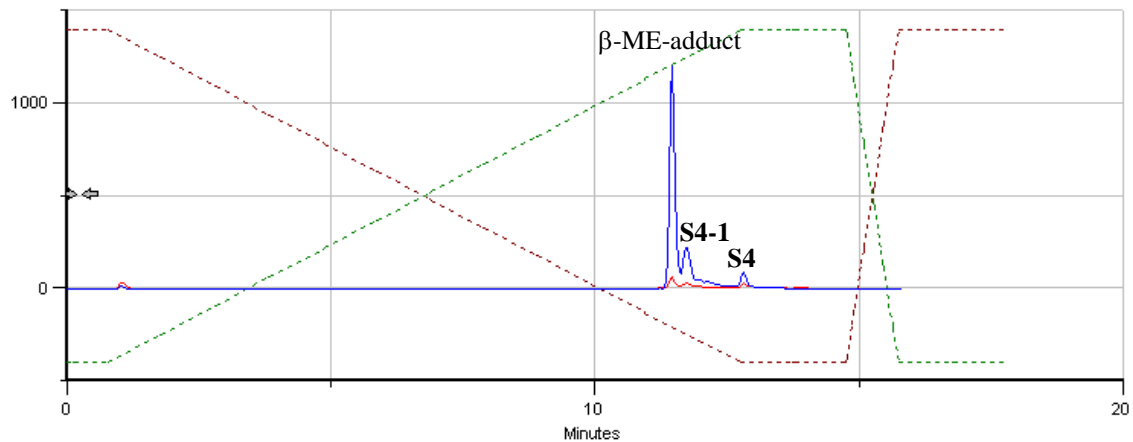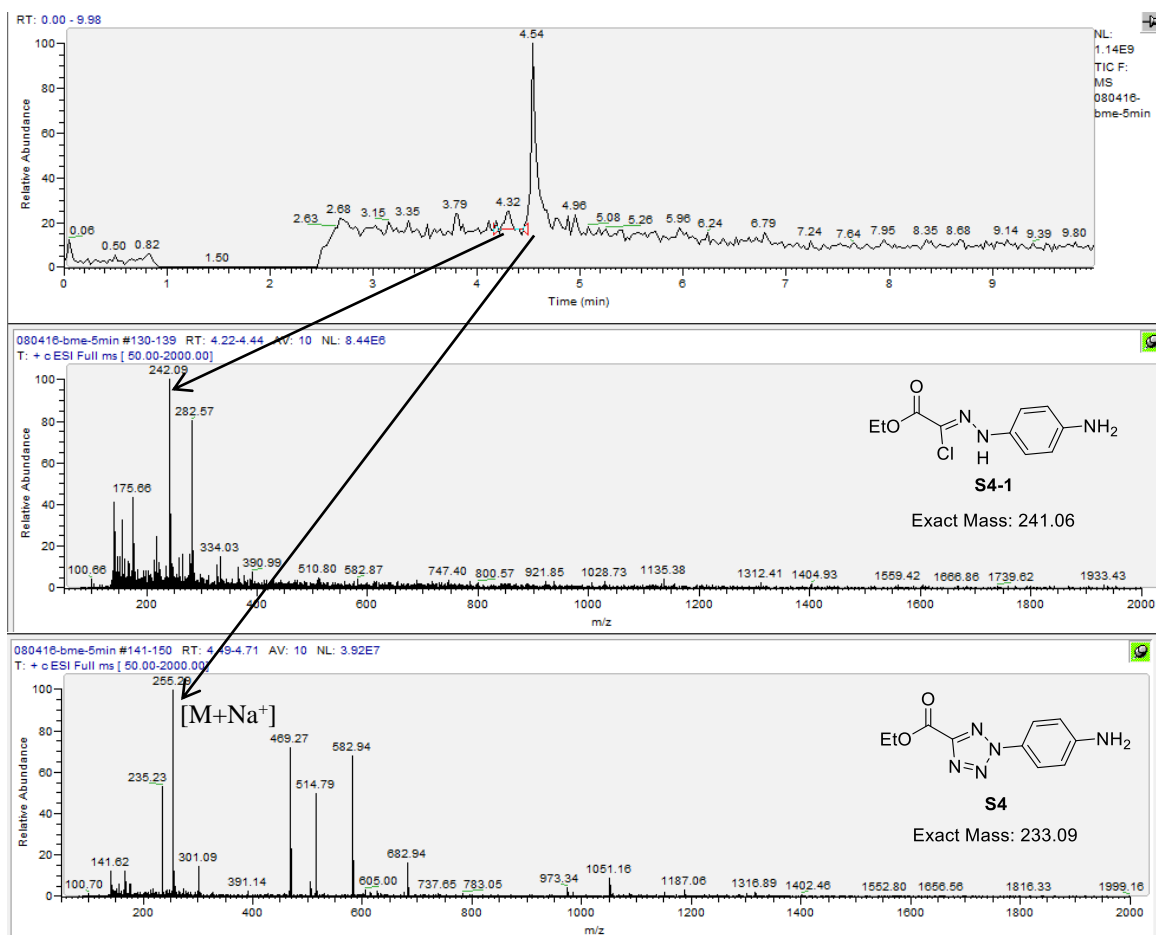

d)

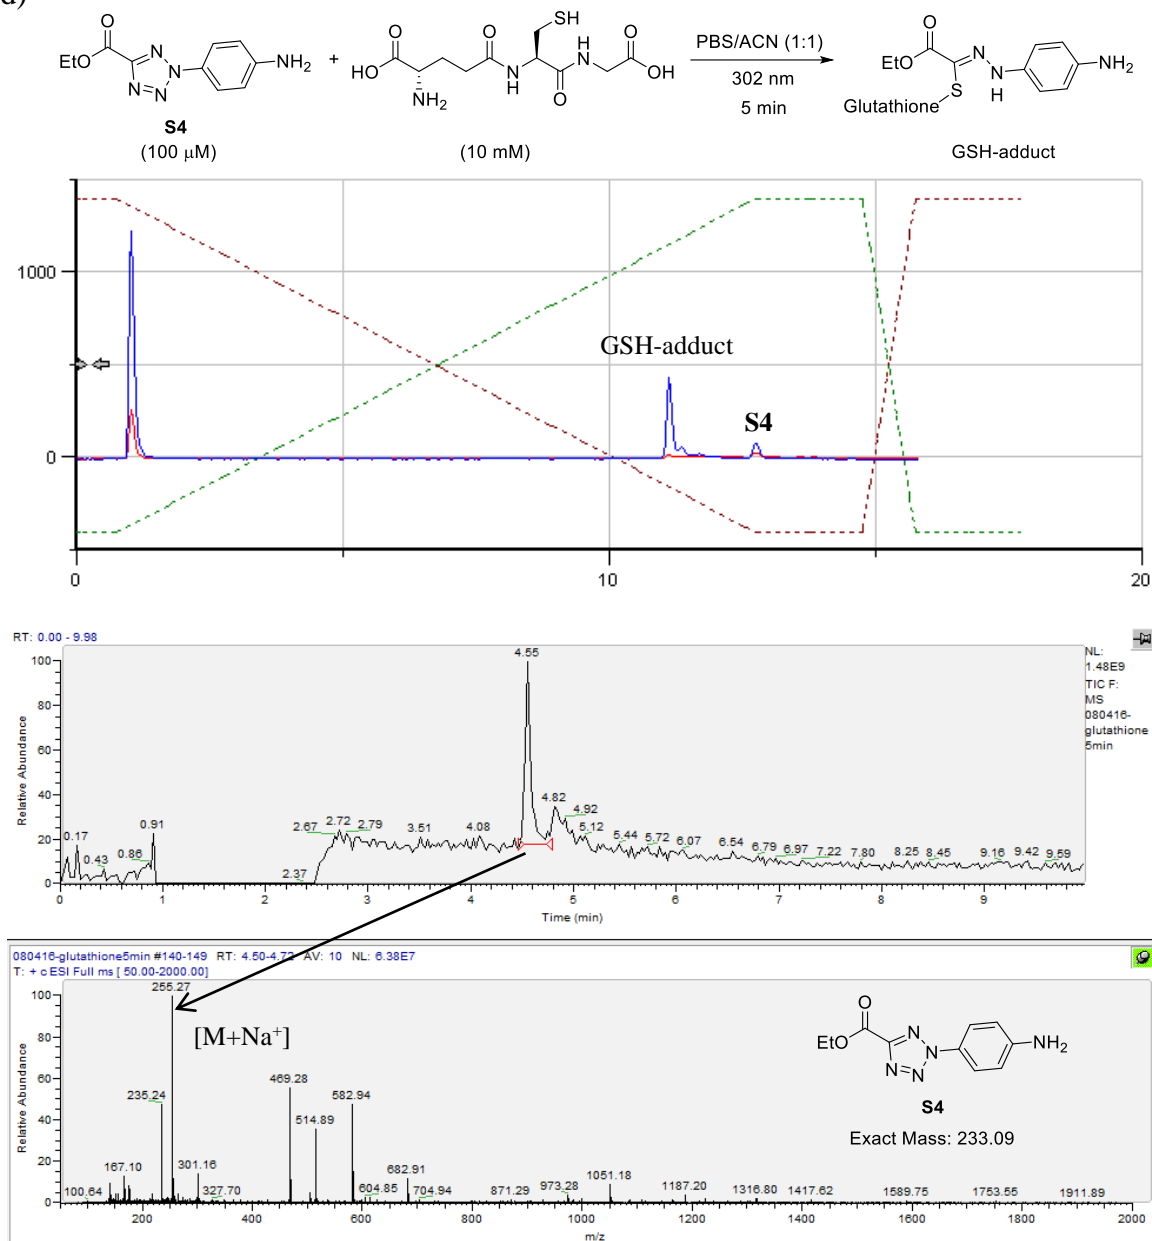

e)

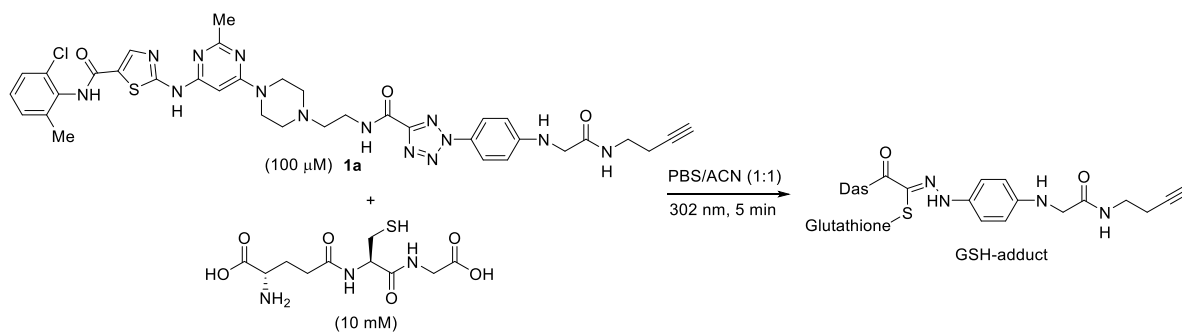

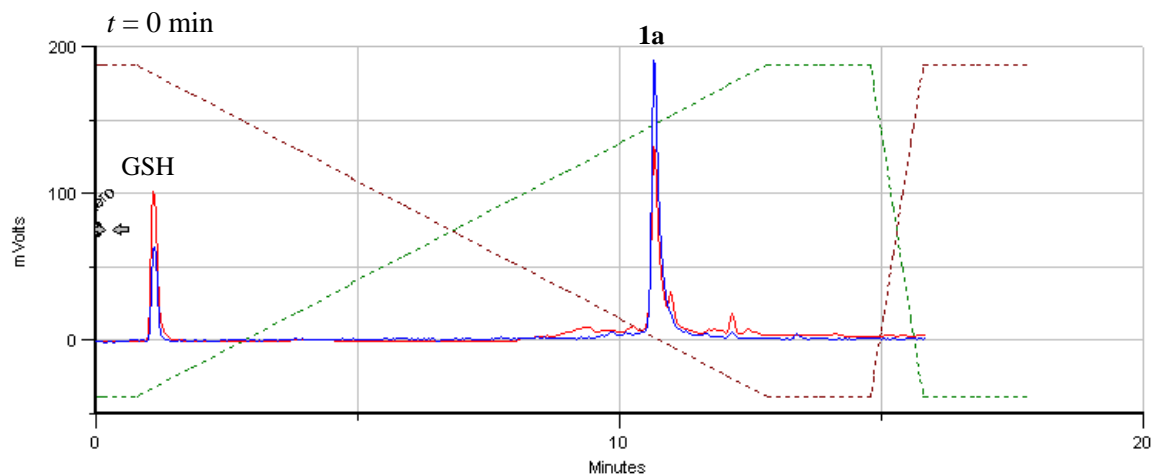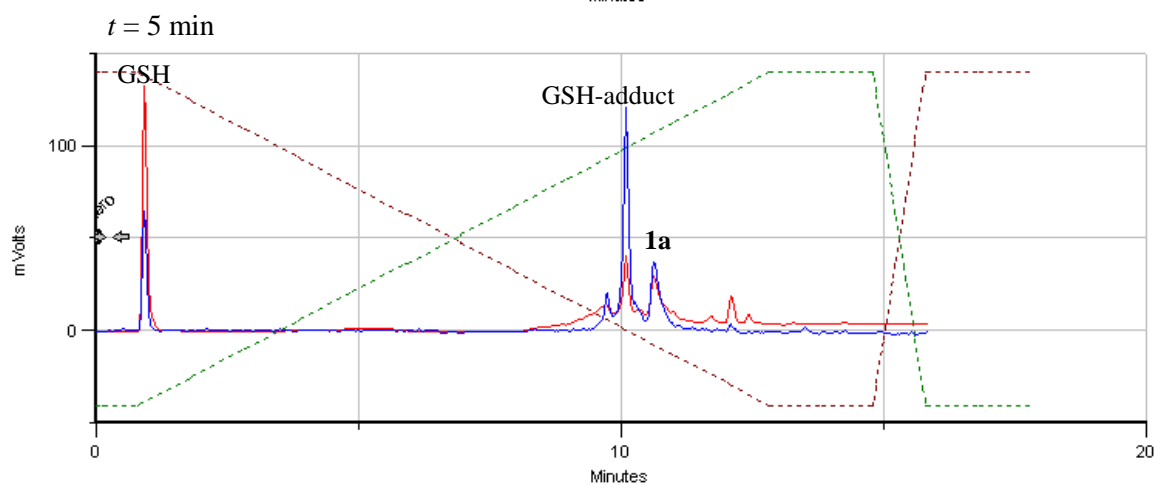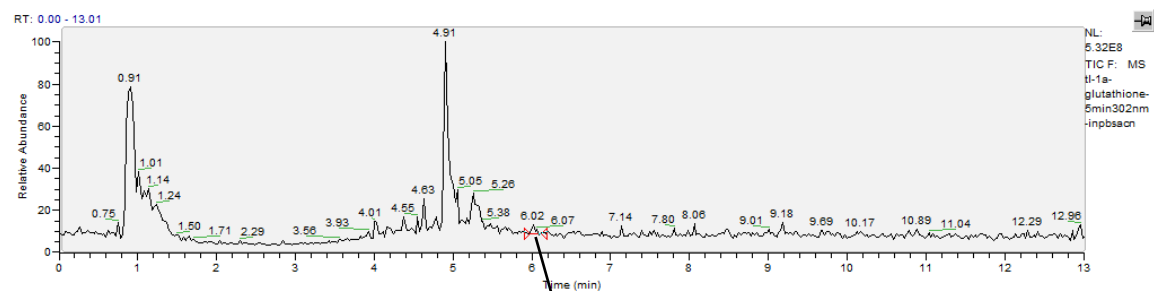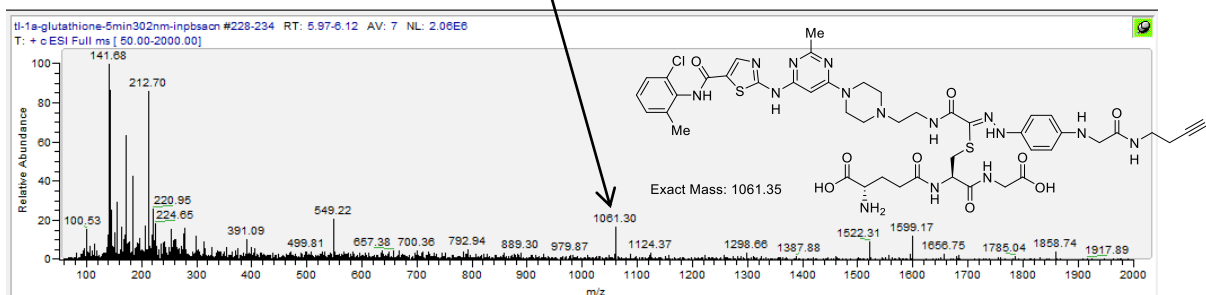

**Figure S9.** Model studies of the quenching reactions between 100  $\mu\text{M}$  **S4** and 10 mM (a) L-serine, (b) L-glutamic acid, (c)  $\beta$ -mercaptoethanol, and (d) glutathione in acetonitrile/PBS (1:1, 70 mM  $\text{Cl}^-$ , pH 7.5) after 5-min 302 nm photoirradiation. (e) Quenching of probe **1a** (100  $\mu\text{M}$ ) by 10 mM glutathione in acetonitrile/PBS (1:1, 70 mM  $\text{Cl}^-$ , pH 7.5) after 5-min 302 nm photoirradiation. For HPLC chromatogram, red trace = absorbance at 254 nm; blue trace = absorbance at 365 nm. While L-serine and L-glutamic acid cannot compete effectively with the chloride quenching,  $\beta$ -mercaptoethanol and glutathione can form covalent adducts with the in situ generated carboxy-nitrile imine based on HPLC traces. However, the thiol-adduct masses were not detectable in (c) and (d), but detectable in (e), presumably due to differences in ionization potential of the adducts.

a) Diaryltetrazole **S12** (100  $\mu\text{M}$ ) without photoirradiation

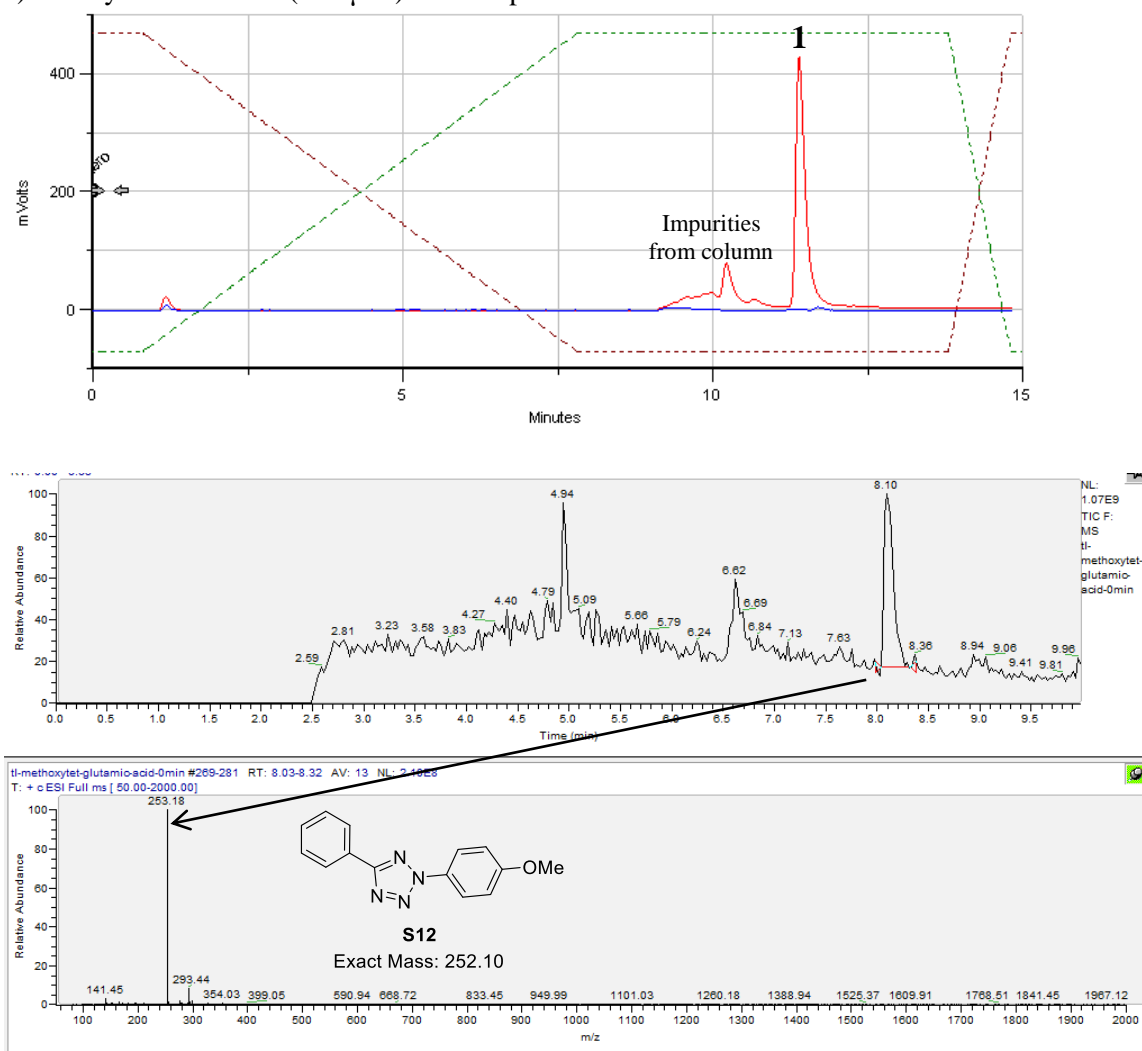

b) Diaryltetrazole **S12** only (100  $\mu$ M) in PBS/ACN (1:1), irradiated at 302 nm for 5 min

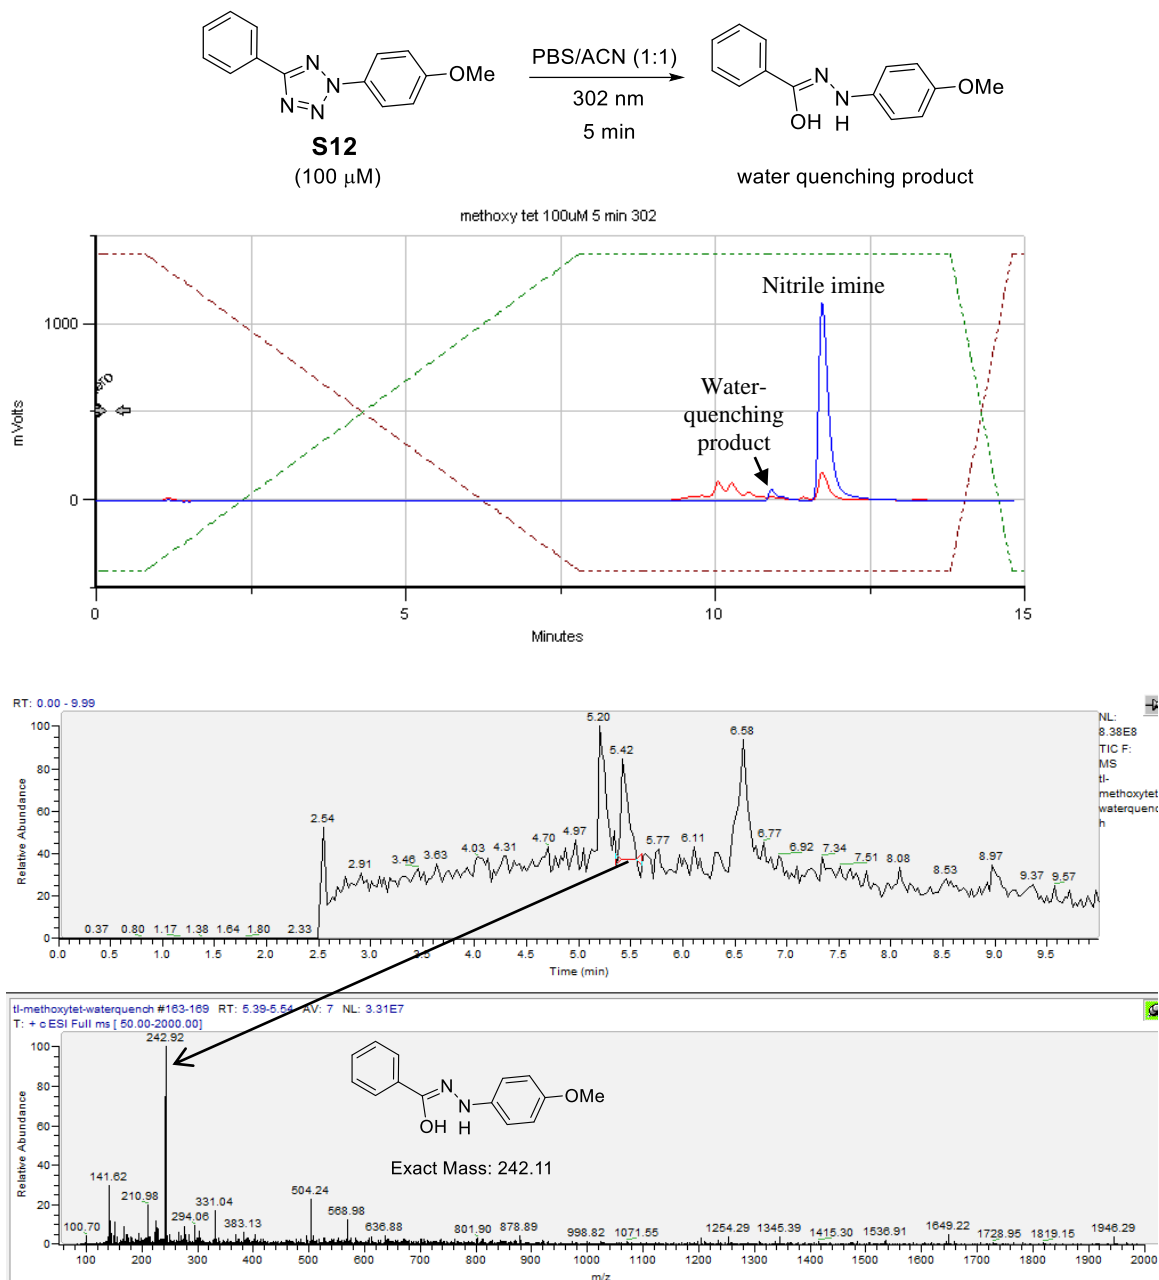

c) Diaryltetrazole **S12** (100  $\mu$ M)+10 mM glutamic acid in PBS/ACN (1:1), irradiated at 302 nm for 5 min

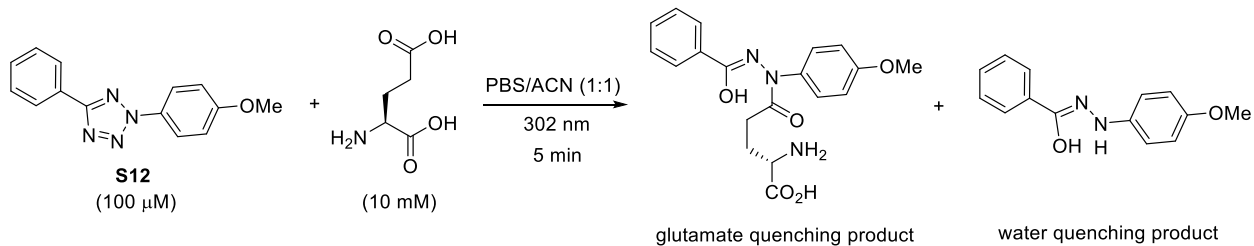

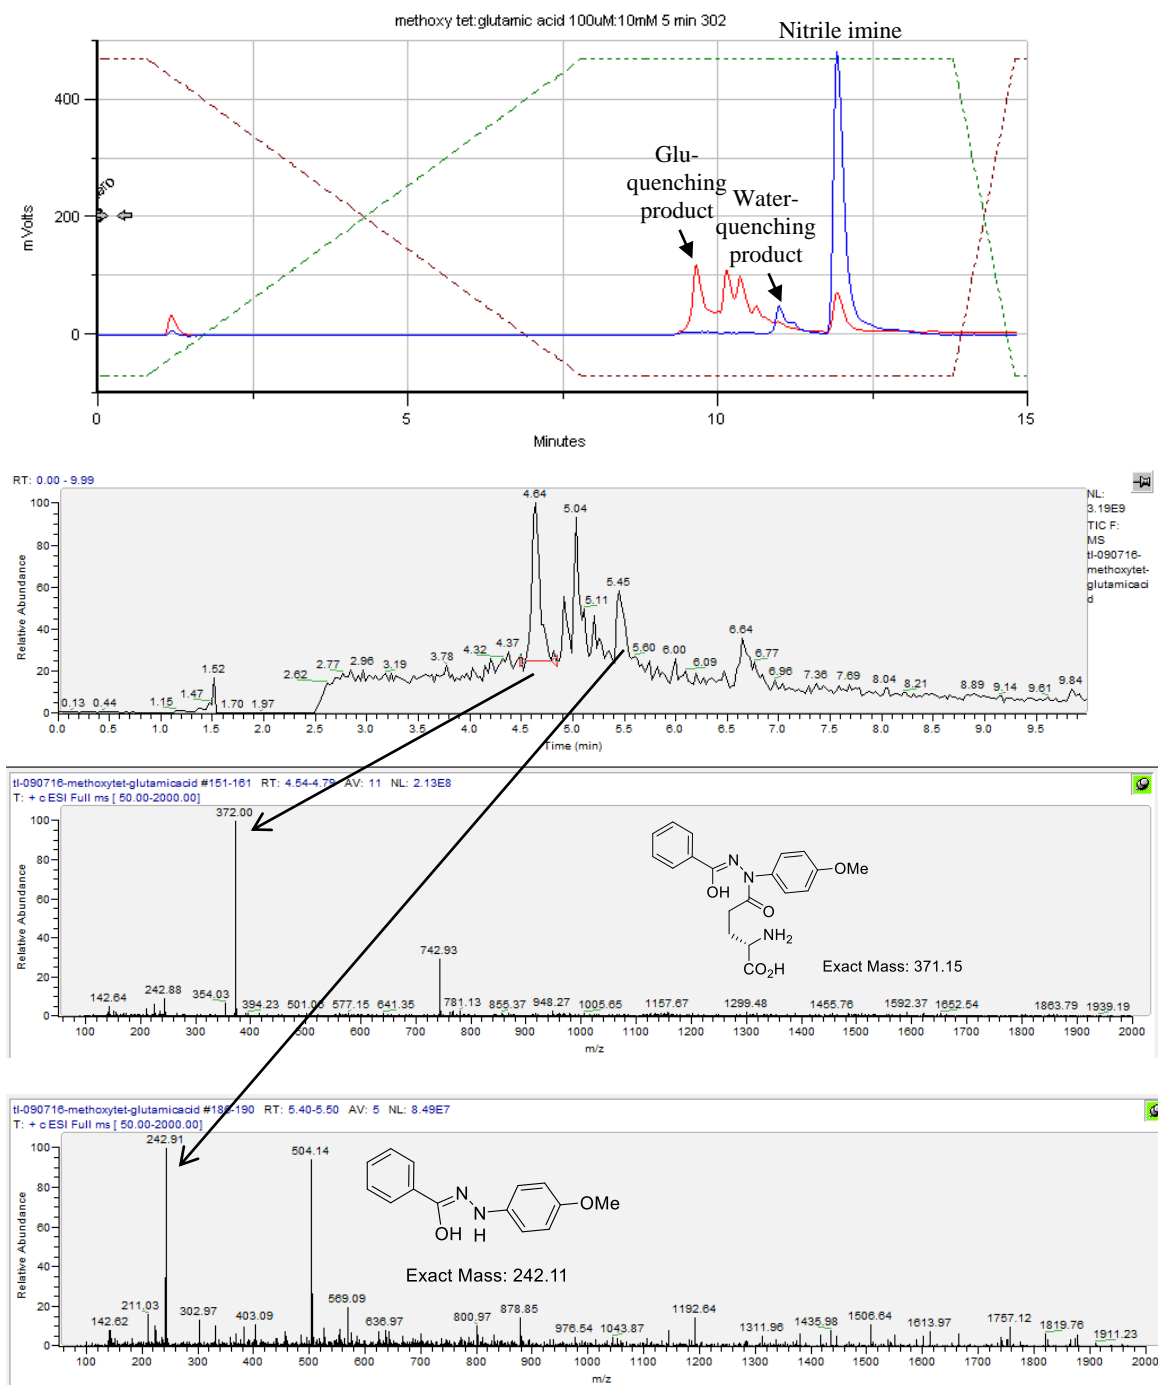

**Figure S10.** Model studies of the quenching reaction of **S12** by glutamic acid in PBS/acetonitrile (1:1).

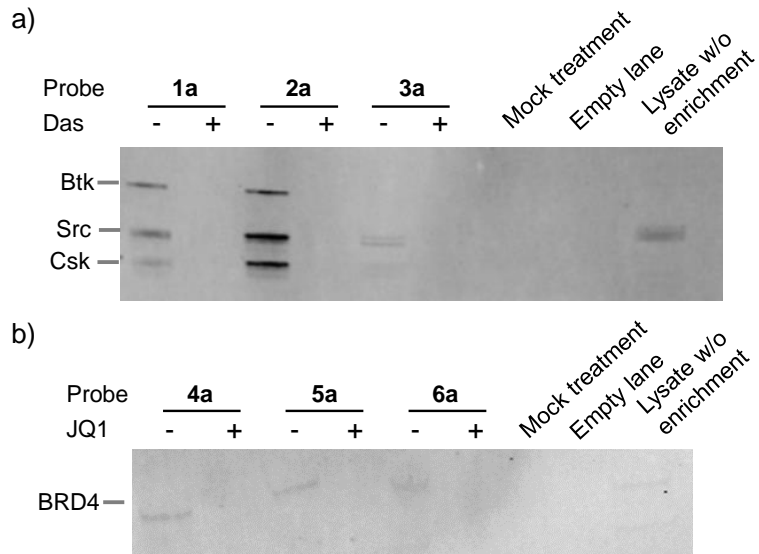

**Figure S11.** Western blot detection of the targets after the photoaffinity label-mediated cross-linking and subsequent pulldown. (a) Western blot of BTK, Src and Csk in the pull-downed samples using a mixture of anti-BTK, anti-Src, and anti-Csk antibodies followed by detection with an IR dye-conjugated secondary antibody. (b) Western blot of BRD4 in the pull-downed samples using an anti-BRD4 antibody followed by detection with an IR dye-conjugated secondary antibody.

**Table S3.** Kinase targets captured by probes **1a** and **2a** and identified by LC-MS/MS.

| Accession | Gene ID | Description                         | # unique peptides | AUC: enriched by <b>1a</b> | AUC: inhibited by Dasatinib |
|-----------|---------|-------------------------------------|-------------------|----------------------------|-----------------------------|
| Q06187    | BTK     | Tyrosine-protein kinase BTK         | 15                | 3.00E+06                   | N/D                         |
| P07948    | LYN     | Tyrosine-protein kinase Lyn         | 5                 | 1.30E+06                   | N/D                         |
| P07947    | YES1    | Tyrosine-protein kinase Yes         | 4                 | 1.30E+06                   | N/D                         |
| P41240    | CSK     | Tyrosine-protein kinase CSK         | 6                 | 1.20E+06                   | N/D                         |
| Q16539    | MAPK14  | Mitogen-activated protein kinase 14 | 4                 | 1.20E+06                   | N/D                         |
| Q53H12    | AGK     | Acylglycerol kinase, mitochondrial  | 3                 | 4.40E+05                   | N/D                         |

| Accession | Gene ID  | Description                                            | # unique peptides | AUC: enriched by <b>2a</b> | AUC: inhibited by Dasatinib |
|-----------|----------|--------------------------------------------------------|-------------------|----------------------------|-----------------------------|
| P00519    | ABL1     | Tyrosine-protein kinase ABL1                           | 3                 | 3.80E+05                   | N/D                         |
| Q06187    | BTK      | Tyrosine-protein kinase BTK                            | 15                | 2.30E+06                   | N/D                         |
| P41240    | CSK      | Tyrosine-protein kinase CSK                            | 6                 | 1.30E+06                   | N/D                         |
| P07948    | LYN      | Tyrosine-protein kinase Lyn                            | 6                 | 1.10E+06                   | N/D                         |
| Q16539    | MAPK14   | Mitogen-activated protein kinase 14                    | 3                 | 1.20E+06                   | N/D                         |
| P49137    | MAPKAPK2 | MAP kinase-activated protein kinase 2                  | 2                 | 4.70E+05                   | N/D                         |
| O43353    | RIPK2    | Receptor-interacting serine/threonine-protein kinase 2 | 3                 | 8.30E+05                   | N/D                         |
| P07947    | YES1     | Tyrosine-protein kinase Yes                            | 8                 | 2.90E+06                   | N/D                         |

N/D, not detected.

**Table S4.** Protein targets captured by probes **4a** and **5a** and identified by LC-MS/MS.

| Accession | Gene ID | Description                      | #<br>Unique<br>peptides | AUC:<br>enriched by<br><b>4a</b> | AUC:<br>inhibited<br>by JQ-1 |
|-----------|---------|----------------------------------|-------------------------|----------------------------------|------------------------------|
| P25440    | BRD2    | Bromodomain-containing protein 2 | 4                       | 5.90E+05                         | N/D                          |
| Q15059    | BRD3    | Bromodomain-containing protein 3 | 3                       | 3.50E+05                         | N/D                          |
| O60885    | BRD4    | Bromodomain-containing protein 4 | 3                       | 6.00E+05                         | N/D                          |
| Q08554    | DSC1    | Desmocollin-1                    | 2                       | 2.40E+05                         | N/D                          |

| Accession | Gene ID | Description                      | #<br>Unique<br>peptides | AUC:<br>enriched<br>by <b>5a</b> | AUC:<br>inhibited<br>by JQ-1 |
|-----------|---------|----------------------------------|-------------------------|----------------------------------|------------------------------|
| P25440    | BRD2    | Bromodomain-containing protein 2 | 7                       | 9.60E+05                         | N/D                          |
| Q15059    | BRD3    | Bromodomain-containing protein 3 | 3                       | 3.10E+05                         | N/D                          |
| O60885    | BRD4    | Bromodomain-containing protein 4 | 4                       | 8.10E+05                         | N/D                          |
| P04745    | AMY1A   | Alpha-amylase 1                  | 2                       | 8.20E+05                         | N/D                          |
| P19013    | KRT4    | Keratin, type II cytoskeletal 4  | 5                       | 4.00E+05                         | N/D                          |

N/D, not detected.

**Table S5.** Comparison of kinases identified from this study with those reported in the literature. The common kinase targets identified by probes **1a/2a** in the present study are colored in blue. N/D, not detected.

| Gene ID       | AUC:<br>enriched<br>by Das-<br>ACT ( <b>1a</b> ) | AUC:<br>enriched<br>by Das-<br>DA ( <b>2a</b> ) | JACS 2012 <sup>a</sup> |            | J.<br>Proteo<br>mics<br>2011 <sup>b</sup> | PNAS<br>2007 <sup>c</sup> | Nat.<br>Chem.<br>Biol.<br>2010 <sup>d</sup> | Blood<br>2007 <sup>e</sup> | Nat.<br>Biotech.<br>2007 <sup>f</sup> |
|---------------|--------------------------------------------------|-------------------------------------------------|------------------------|------------|-------------------------------------------|---------------------------|---------------------------------------------|----------------------------|---------------------------------------|
|               |                                                  |                                                 | In<br>vitro            | In<br>situ | In<br>vitro                               | Immobilized<br>Das        | Immobilized<br>Das                          | Immobilized<br>Das         | Immobilized,<br>ligand                |
| ABL1          | N/D                                              | 3.80E+05                                        |                        |            |                                           | +                         | +                                           | +                          | + (BCR-ABL)                           |
| AGK           | 4.40E+05                                         | N/D                                             | +                      | +          |                                           |                           |                                             |                            |                                       |
| <b>BTK</b>    | 3.00E+06                                         | 2.30E+06                                        | +                      | -          |                                           | +                         |                                             | +                          | +                                     |
| <b>CSK</b>    | 1.20E+06                                         | 1.30E+06                                        | +                      | -          | +                                         | +                         | +                                           | +                          | +                                     |
| <b>LYN</b>    | 1.30E+06                                         | 1.10E+06                                        | +                      | -          |                                           | +                         | +                                           | +                          | +                                     |
| <b>MAPK14</b> | 1.20E+06                                         | 1.20E+06                                        |                        |            |                                           |                           | +                                           | +                          | +                                     |
| MAPKAPK2      | N/D                                              | 4.70E+05                                        | +                      | -          |                                           |                           |                                             |                            |                                       |
| RIPK2         | N/D                                              | 8.30E+05                                        |                        |            |                                           |                           | +                                           | +                          | +                                     |
| <b>YES1</b>   | 1.30E+06                                         | 2.90E+06                                        | +                      | -          |                                           | +                         | +                                           | +                          | +                                     |

<sup>a</sup> “Cell-based proteome profiling of potential Dasatinib targets by use of affinity-based probes” Shi, H.; et al. *J. Am. Chem. Soc.* **2012**, *134*, 3001-3014. This paper described the in vitro and in situ photo-cross-linking enabled target capture and identification in HEPG2 and K562 cells. Only one kinase, AGK2, was identified in situ.

<sup>b</sup> “Dasatinib, Imatinib and staurosporine capture compounds—Complementary tools for the profiling of kinases by Capture Compound Mass Spectrometry (CCMS)” Fischer, J. J.; et al. *J. Proteomics* **2011**, *75*, 160-168. In vitro target capture from HEPG2 cell lysate using the Dasatinib/Imatinib-photo-cross-linker-biotin conjugates.

<sup>c</sup> “The Btk tyrosine kinase is a major target of the Bcr-Abl inhibitor Dasatinib” Hantschel, O.; et al. *Proc. Natl. Acad. Sci. U.S.A.* **2007**, *104*(33), 13283-13288. The immobilized Dasatinib was used in target capture and identification in K562 cell lysate.

<sup>d</sup> “A chemical and phosphoproteomic characterization of dasatinib action in lung cancer” Li, J.; et al. *Nat. Chem. Biol.* **2010**, *6*, 291-299. The immobilized Dasatinib was used in target capture in the H292, H441 and HCC827 cell lysates.

<sup>e</sup> “Quantitative chemical proteomics reveals mechanisms of action of clinical ABL kinase inhibitors” Bantscheff, M.; et al. *Nat. Biotechnol.* **2007**, *25*, 1035. An immobilized mixture of

kinase inhibitors (“kinobeads”) was used, together with pretreatment with a certain inhibitor (e.g. Das), in detecting the specific capture of kinase targets. The K562 and HeLa cell lysates were used in the *in vitro* capture.

<sup>f</sup> “Chemical proteomic profiles of the BCR-ABL inhibitors imatinib, nilotinib, and Dasatinib reveal novel kinase and nonkinase targets” Rix, U.; et al. *Blood* **2007**, *110*, 4055-4063. The immobilized Dasatinib was used in target capture and identification in K562 and primary CML cell lysates.

**Table S6.** Comparison of protein targets from this study with those reported in the literature. The common protein targets identified by probes **4a/5a** in the present study are colored in blue. N/D, not detected.

| Gene ID     | Protein Name                     | AUC:<br>enriched by<br>JQ-1-ACT<br>( <b>4a</b> ) | AUC:<br>enriched by<br>JQ-1-DA ( <b>5a</b> ) | JACS 2014 <sup>a</sup> |
|-------------|----------------------------------|--------------------------------------------------|----------------------------------------------|------------------------|
| AMY1A       | Alpha-amylase 1                  | N/D                                              | 8.20E+05                                     | -                      |
| <b>BRD2</b> | Bromodomain-containing protein 2 | 5.90E+05                                         | 9.60E+05                                     | -                      |
| <b>BRD3</b> | Bromodomain-containing protein 3 | 3.50E+05                                         | 3.10E+05                                     | -                      |
| <b>BRD4</b> | Bromodomain-containing protein 4 | 6.00E+05                                         | 8.10E+05                                     | -                      |
| DSC1        | Desmocollin-1                    | 2.40E+05                                         | N/D                                          | -                      |
| KRT4        | Keratin, type II cytoskeletal 4  | N/D                                              | 4.00E+05                                     | -                      |

<sup>a</sup> “Minimalist cyclopropene-containing photo-cross-linkers suitable for live-cell imaging and affinity-based protein labeling” Li, Z.; et al. *J. Am. Chem. Soc.* **2014**, *136*, 9990-9998. A related BRD4 inhibitor (structure shown below), not JQ-1, was used in this study. None of BRD proteins showed up in their high-confidence target list after *in situ* target capture in HEPG2 cells and subsequent LC-MS/MS analysis.

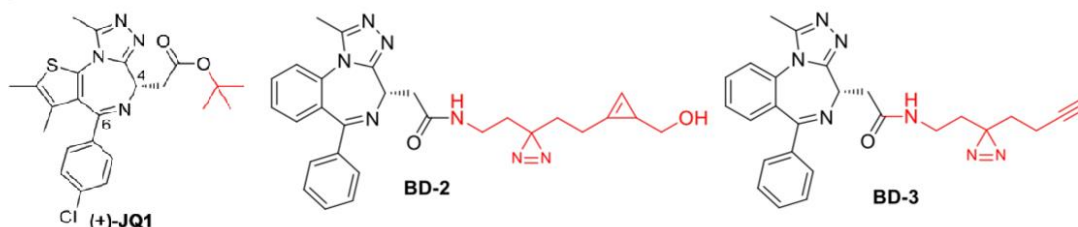

## General Information

Recombinant human BTK protein used in the in-gel fluorescence experiments was purchased from Thermo Fisher (Cat. No. PR5442A). Recombinant human BTK (387-659) was used in the LC-MS based cross-linking experiments. Recombinant human BRD4 (44-168) protein used in the in-gel fluorescence and LC-MS studies was purchased from Active Motif (Cat. No. 31380). Solvents and chemicals were purchased from commercial sources and used directly without further purification. Flash chromatography was performed with SiliCycle P60 silica gel (40-63  $\mu\text{m}$ , 60  $\text{\AA}$ ).  $^1\text{H}$  NMR spectra were recorded with Varian Mercury-300, Inova-400 or -500 MHz spectrometers at University at Buffalo and Agilent 400-MR, Varian Inova 500 MHz, Varian VNMRs 500 MHz, Bruker Avance III 500 MHz at Abbvie. Chemical shifts were reported in ppm using either TMS or deuterated solvents as internal standards (TMS, 0.00;  $\text{CDCl}_3$ , 7.26;  $\text{CD}_3\text{OD}$ , 3.31;  $\text{DMSO}-d_6$ , 2.50). Multiplicity was reported as follows: s = singlet, d = doublet, t = triplet, q = quartet, p = pentet, m = multiplet, brs = broad.  $^{13}\text{C}$  NMR spectra were recorded at 75.4 or 126 MHz, and chemical shifts were reported in ppm using deuterated solvents as internal standards ( $\text{CDCl}_3$ , 77.0;  $\text{DMSO}-d_6$ , 39.5;  $\text{CD}_3\text{OD}$ , 49.05). High resolution mass spectrometry was performed on a Bruker solarix XR Fourier transform ion cyclotron resonance mass spectrometer (FT-ICR-MS). In-gel fluorescence images were acquired by scanning SDS-PAGE gels with a BioRad PharosFX imager. Invitrogen PVDF membranes were used for western blots and scanned using Licor. For photoirradiation with a hand-held UV lamp, if not specified, 5 min 302-nm photoirradiation was carried out for ACT probes, 10 min 365-nm photoirradiation was carried out for DA probes, and 10 min 302-nm photoirradiation was carried out for BP probes.

## Experimental Procedures and Characterization Data

### Scheme S1. Synthesis of the alkyne-functionalized ACT photo-affinity label

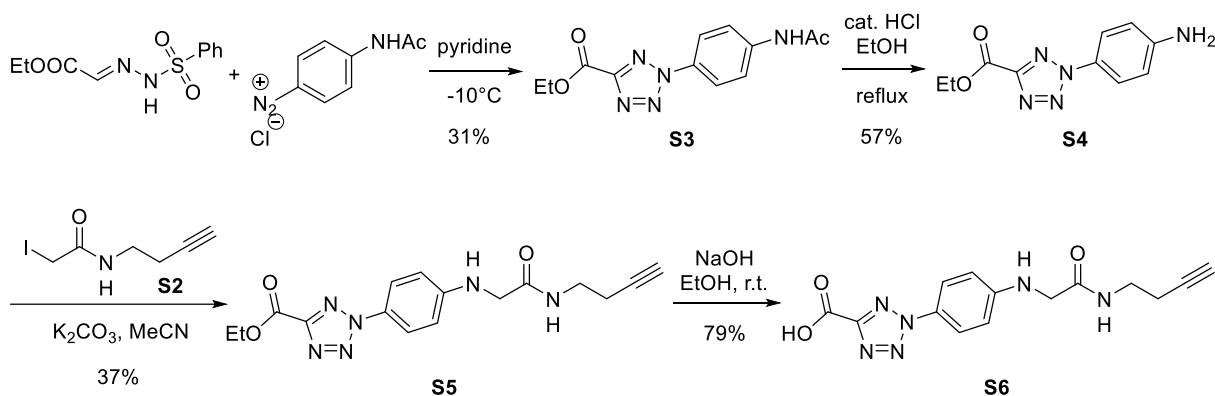

**N-(But-3-yn-1-yl)-2-chloroacetamide (S1):** To a solution of but-3-yn-1-amine (250 mg, 3.62 mmol) and ethyldiisopropylamine (561 mg, 4.34 mmol) in 25 mL  $\text{CH}_2\text{Cl}_2$  cooled in ice-water bath was added dropwise a solution of 2-chloroacetyl chloride (490 mg, 4.34 mmol) in 5 mL  $\text{CH}_2\text{Cl}_2$ . The ice-water bath was removed, and the mixture was stirred at r.t. for 3 h. Afterwards, additional 20 mL  $\text{CH}_2\text{Cl}_2$  was added, and the organic layer was washed successively with 20 mL saturated  $\text{NaHCO}_3$ , 20 mL 2 N HCl and 20 mL brine, and dried over  $\text{MgSO}_4$ . The solvent was then removed under reduced pressure to give the desired product as a brownish oil (427 mg, 81% yield):  $R_f =$

0.28 (hexanes/EtOAc = 2:1);  $^1\text{H}$  NMR (300 MHz,  $\text{CDCl}_3$ )  $\delta$  7.08 (s, 1H), 3.96 (s, 2H), 3.35 (q,  $J$  = 6.1 Hz, 2H), 2.34 (s, 2H), 1.98 (s, 1H);  $^{13}\text{C}$  NMR (75 MHz,  $\text{CDCl}_3$ )  $\delta$  166.1, 80.9, 70.3, 42.5, 38.2, 19.0.

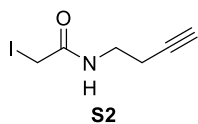

***N*-(But-3-yn-1-yl)-2-iodoacetamide (S2):** To a solution of **S1** (415 mg, 2.85 mmol) in 15 mL acetone was added NaI (1.28 g, 8.55 mmol), and the mixture was refluxed for 4 h. After the solvent was evaporated, the residue was re-dissolved in 30 mL EtOAc and 30 mL water. The organic layer was separated, washed successively with 20 mL 10%  $\text{Na}_2\text{S}_2\text{O}_3$ , 20 mL  $\text{H}_2\text{O}$  and 20 mL brine. After drying the solution over  $\text{MgSO}_4$ , the solvent was removed with rotary evaporator to give the desired product as a light brown solid (471 mg, 70% yield), which was used directly without further purification:  $^1\text{H}$  NMR (300 MHz,  $\text{CDCl}_3$ )  $\delta$  6.72 (s, 1H), 3.70 (s, 2H), 3.40 (q,  $J$  = 6.4 Hz, 2H), 2.41 (td,  $J$  = 6.5, 2.6 Hz, 2H), 2.04-2.01 (m, 1H);  $^{13}\text{C}$  NMR (75 MHz,  $\text{CDCl}_3$ )  $\delta$  167.4, 81.2, 70.4, 39.0, 19.1, -0.6.

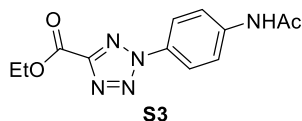

**Ethyl 2-(4-acetamidophenyl)-2H-tetrazole-5-carboxylate (S3):** A solution of 50% ethyl 2-oxoacetate in toluene (3.042 g, 14.9 mmol) and benzenesulfonyl hydrazide (1.72 g, 11.5 mmol) in 60 mL EtOH was stirred at r.t. for 1 h. The solvent was removed under reduced pressure, and the residue was re-dissolved in 60 mL pyridine. Separately, to a suspension of *N*-(4-aminophenyl)acetamide (1.607 g, 10.7 mmol) and 4 mL concentrated HCl in 8 mL  $\text{H}_2\text{O}$  and 10 mL EtOH was added dropwise a solution of  $\text{NaNO}_2$  (0.775 g, 5.2 mmol) in 3 mL  $\text{H}_2\text{O}$  at 0 °C. After 10-minute stirring, this solution was added dropwise to the previously prepared pyridine solution over 50 min at -10 °C. The mixture was warmed up to r.t. over 2 h with stirring before 100 mL  $\text{H}_2\text{O}$  was added. The solution was extracted with 70 mL  $\text{CH}_2\text{Cl}_2$  three times, and the organic layers were collected, combined, washed successively with 3×100 mL 2 N HCl and 1×70 mL brine. After drying over  $\text{MgSO}_4$ , the solvent was removed on a rotary evaporator. The dark brown oily residue was applied to a silica gel flash chromatography using hexanes/EtOAc (1:1 → 1:4) as the eluent to give the crude product as a dark yellow oil (2.235 g). The crude product was recrystallized twice from EtOH to give the titled compound as a yellow powder (906 mg, 31% yield):  $R_f$  = 0.44 (hexanes/EtOAc = 1:4);  $^1\text{H}$  NMR (300 MHz,  $\text{DMSO}-d_6$ )  $\delta$  10.35 (s, 1H), 8.07 (d,  $J$  = 9.1 Hz, 2H), 7.87 (d,  $J$  = 9.1 Hz, 2H), 4.46 (q,  $J$  = 7.1 Hz, 2H), 2.10 (s, 3H), 1.37 (t,  $J$  = 7.1 Hz, 3H);  $^{13}\text{C}$  NMR (75 MHz,  $\text{DMSO}-d_6$ )  $\delta$  168.9, 157.2, 157.1, 141.5, 130.6, 121.1, 119.6, 62.3, 24.1, 14.0; HRMS (ESI)  $[\text{M}+\text{H}]^+$  calcd for  $\text{C}_{12}\text{H}_{14}\text{N}_5\text{O}_3$  276.1091  $[\text{M}+\text{H}]^+$ , found 276.1094.

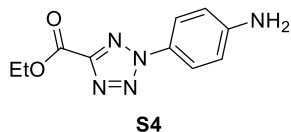

**Ethyl 2-(4-aminophenyl)-2H-tetrazole-5-carboxylate (S4):** To a suspension acetamide derivative **S3** (201 mg, 0.73 mmol) in 5 mL EtOH was added 10 drops of concentrated HCl, and the mixture was refluxed until the starting material was consumed based on thin-layer chromatography. The mixture was cooled down to -20 °C, and the precipitate was collected with a glass filter, washed with cold EtOH, and dried under vacuum to give the titled compound as an off-white powder (97 mg, 57% yield):  $R_f$  = 0.44 (hexanes/EtOAc = 1:1);  $^1\text{H}$  NMR (500 MHz,  $\text{DMSO}-d_6$ )  $\delta$  8.98 (s, 2.6H), 8.07 (d,  $J$  = 8.9 Hz, 2H), 7.39 (d,  $J$  = 8.9 Hz, 2H), 4.45 (q,  $J$  = 7.1 Hz, 2H), 1.36 (t,  $J$  = 7.1 Hz, 3H);  $^{13}\text{C}$  NMR (125 MHz,  $\text{DMSO}-d_6$ )  $\delta$  157.2, 157.1, 140.3, 131.5, 121.8, 121.3, 62.3, 14.0; HRMS (ESI) calcd for  $\text{C}_{10}\text{H}_{12}\text{N}_5\text{O}_2$  234.0986  $[\text{M}+\text{H}^+]$ , found 234.0979.

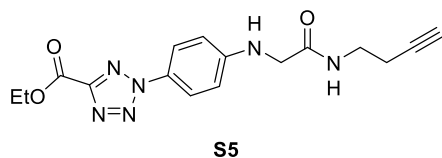

**Ethyl 2-(4-((2-(but-3-yn-1-ylamino)-2-oxoethyl)amino)phenyl)-2H-tetrazole-5-carboxylate (S5):** A mixture of aniline **S4** (88 mg, 0.38 mmol), iodoacetamide **S2** (90 mg, 0.38 mmol) and  $K_2CO_3$  (156 mg, 1.13 mmol) in 3 mL MeCN was refluxed for 2 days. The mixture was filtered through a layer of celite and the solvent was removed with a rotavapor.

The residue was applied to a silica gel flash chromatography using hexanes/EtOAc (1:10) as the eluent to give the desired product as an off-white powder (48 mg, 37% yield):  $R_f$  = 0.25 (hexanes/EtOAc = 1:5);  $^1H$  NMR (500 MHz,  $CDCl_3$ )  $\delta$  8.01 (d,  $J$  = 9.0 Hz, 2H), 6.74 (d,  $J$  = 9.0 Hz, 2H), 6.71 (s, 1H), 4.77 (s, 1H), 4.56 (q,  $J$  = 7.1 Hz, 2H), 3.90 (d,  $J$  = 3.7 Hz, 2H), 3.47 (q,  $J$  = 6.3 Hz, 2H), 2.42 (td,  $J$  = 6.4, 2.6 Hz, 2H), 1.91 (t,  $J$  = 2.6 Hz, 1H), 1.48 (t,  $J$  = 7.1 Hz, 3H);  $^{13}C$  NMR (75 MHz,  $DMSO-d_6$ )  $\delta$  169.5, 157.4, 156.7, 150.5, 125.4, 121.6, 112.4, 82.1, 72.2, 62.1, 46.3, 37.7, 18.7, 14.0; HRMS (ESI) calcd for  $C_{16}H_{19}N_6O_3$  343.1513  $[M+H]^+$ , found: 343.1514.

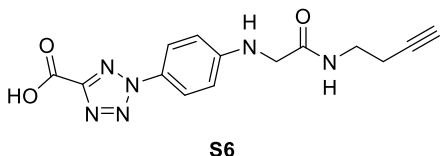

**2-(4-((2-(but-3-yn-1-ylamino)-2-oxoethyl)amino)phenyl)-2H-tetrazole-5-carboxylic acid (S6):** To a solution of tetrazole carboxylate **S5** (37 mg, 0.11 mmol) in 1 mL EtOH at r.t. was added 2 mL 2 N NaOH, and the mixture was stirred at r.t. until the starting material was completely consumed based on thin layer chromatography. The solution was added

5 mL EtOAc and then acidified. The precipitate that appeared was collected with a glass filter, washed with water, and dried under vacuum to give the titled compound as an off-white powder (27 mg, 79% yield):  $^1H$  NMR (300 MHz,  $DMSO-d_6$ )  $\delta$  8.16 (t,  $J$  = 5.8 Hz, 1H), 7.82 (d,  $J$  = 9.0 Hz, 2H), 6.74 (d,  $J$  = 9.1 Hz, 2H), 3.74 (s, 2H), 3.22 (q,  $J$  = 7.0 Hz, 2H), 2.84 (t,  $J$  = 2.6 Hz, 1H), 2.30 (td,  $J$  = 7.1, 2.7 Hz, 2H);  $^{13}C$  NMR (125 MHz,  $DMSO-d_6$ )  $\delta$  169.6, 158.8, 157.6, 150.4, 125.6, 121.5, 112.4, 82.1, 72.1, 46.3, 37.7, 18.7; HRMS (ESI) calcd for  $C_{14}H_{15}N_6O_3$  315.1200  $[M+H]^+$ , found: 315.1202.

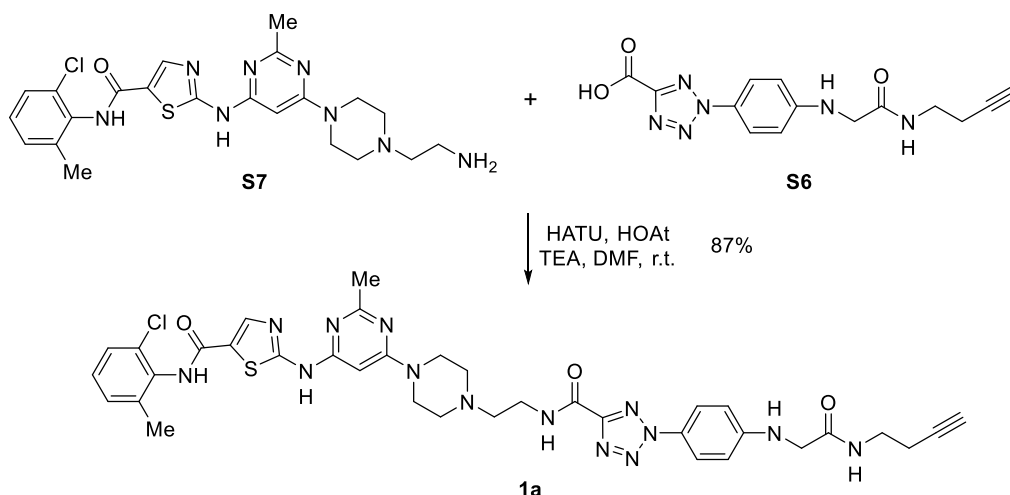

**Synthesis of 1a:** A solution of dasatinib amine-3TFA salt **S7** (15.0 mg, 0.018 mmol), tetrazole carboxylic acid **S6** (6.8 mg, 0.022 mmol), HATU (8.3 mg, 0.022 mmol), 3-hydroxytriazolo[4,5-b]pyridine (HOAt; 3.0 mg, 0.022 mmol), and triethylamine (10.6  $\mu$ L, 0.076 mmol) in 150  $\mu$ L DMF was stirred at r.t. overnight. The reaction mixture was applied to a medium-pressure silica gel flash chromatography system equipped with an automatic fraction collector running the MeOH/ $CH_2Cl_2$

(2:98→20:80) eluent gradient. The suitable fractions were pooled and evaporated under reduced pressure. The residue was re-dissolved in 3 mL MeCN and 3 mL H<sub>2</sub>O containing 0.5% TFA, and the solution was lyophilized to dryness to give the titled compound as a white powder (16.0 mg, 87% yield): *R<sub>f</sub>* = 0.63 (MeOH/CH<sub>2</sub>Cl<sub>2</sub> = 1:5); <sup>1</sup>H-NMR (500 MHz, DMSO-*d*<sub>6</sub>) δ 11.46 (s, 0.7H), 9.87 (s, 0.8H), 8.97 (t, *J* = 5.5 Hz, 0.6H), 8.22 (s, 1H), 8.15 (t, *J* = 5.6 Hz, 0.7H), 7.82 (d, *J* = 8.8 Hz, 2H), 7.40 (d, *J* = 7.4 Hz, 1H), 7.32 - 7.22 (m, 2H), 6.78 - 6.71 (m, 3H), 6.06 (s, 1H), 3.74 (d, *J* = 5.4 Hz, 2H), 3.57 - 3.44 (m, 6H), 3.34 - 3.28 (m, 2H), 3.26 - 3.18 (m, 2H), 2.98 (brs, 1H), 2.83 (s, 1H), 2.57 (t, *J* = 6.6 Hz, 2H), 2.55 - 2.51 (m, under the DMSO signal), 2.41 (s, 3H), 2.30 (td, *J* = 6.8, 2.1 Hz, 2H), 2.24 (s, 3H); HRMS (ESI) calcd for C<sub>36</sub>H<sub>40</sub>ClN<sub>14</sub>O<sub>3</sub>S 783.2812 [M+H<sup>+</sup>], found 783.2817. The product purity was also verified by analytical HPLC as shown below.

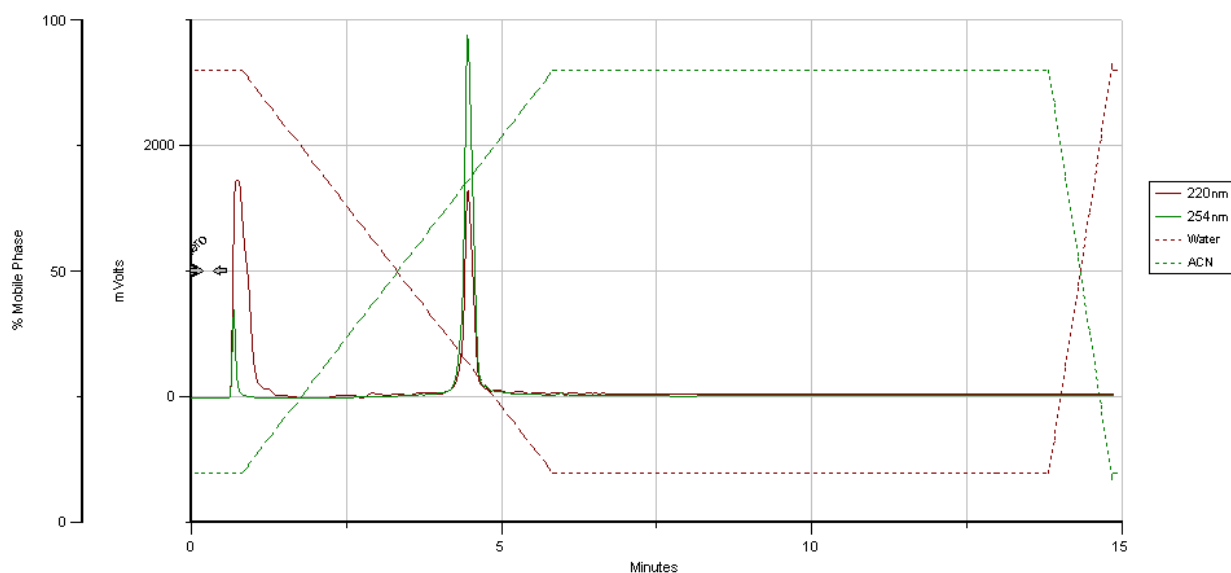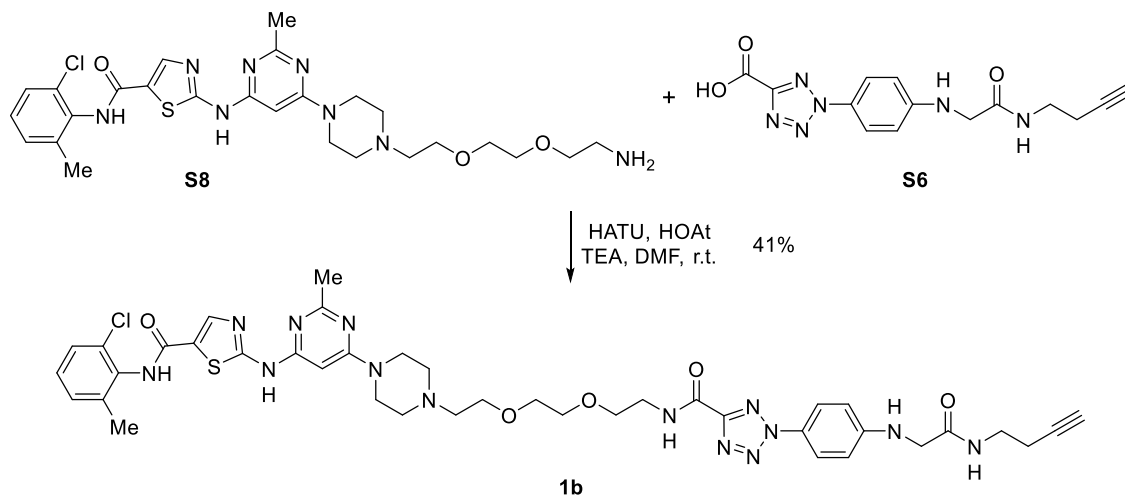

**Synthesis of 1b:** A solution of dasatinib amine-3TFA salt **S8** (15.0 mg, 0.016 mmol), tetrazole carboxylic acid **S6** (6.2 mg, 0.020 mmol), HATU (7.5 mg, 0.020 mmol), HOAt (2.7 mg, 0.020 mmol), and triethylamine (9.6  $\mu$ L, 0.069 mmol) in 150  $\mu$ L DMF was stirred at r.t. overnight. The reaction mixture was applied to a medium-pressure silica gel flash chromatography system equipped with an automatic fraction collector running the MeOH/ CH<sub>2</sub>Cl<sub>2</sub> (2:98→20:80) eluent

gradient. The suitable fractions were pooled and evaporated under reduced pressure. The residue was re-dissolved in 3 mL MeCN and 3 mL H<sub>2</sub>O containing 0.5% TFA, and the solution was lyophilized to dryness to give the titled compound as a white powder (7.4 mg, 41% yield): *R*<sub>f</sub> = 0.61 (MeOH/CH<sub>2</sub>Cl<sub>2</sub> = 1:5); <sup>1</sup>H-NMR (500 MHz, DMSO-*d*<sub>6</sub>) δ 11.45 (s, 0.8H), 9.87 (s, 1H), 8.98 (s, 1H), 8.22 (s, 1H), 8.15 (s, 1H), 7.82 (d, *J* = 8.3 Hz, 2H), 7.40 (d, *J* = 7.2 Hz, 1H), 7.32 - 7.22 (m, 2H), 6.77 - 6.70 (m, 3H), 6.04 (s, 1H), 4.09 (d, *J* = 4.0 Hz, 1H), 3.73 (d, *J* = 5.2 Hz, 2H), 3.62 - 3.43 (m, 18H), 3.27 - 3.12 (m, 7H), 2.82 (s, 0.8H), 2.49 - 2.44 (m, overlapping with the DMSO signal), 2.40 (s, 3H), 2.30 (t, *J* = 5.5 Hz, 2H), 2.24 (s, 3H); HRMS (ESI) calcd for C<sub>40</sub>H<sub>48</sub>ClN<sub>14</sub>O<sub>5</sub>S 871.3336 [M+H]<sup>+</sup>, found 871.3358. The product purity was also verified by analytical HPLC as shown below.

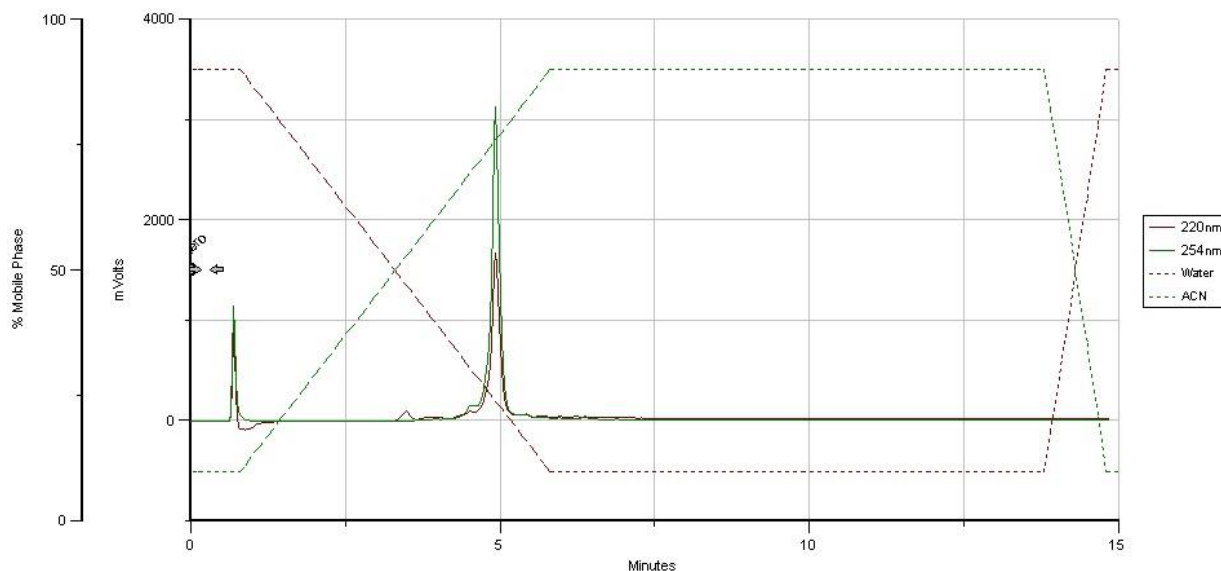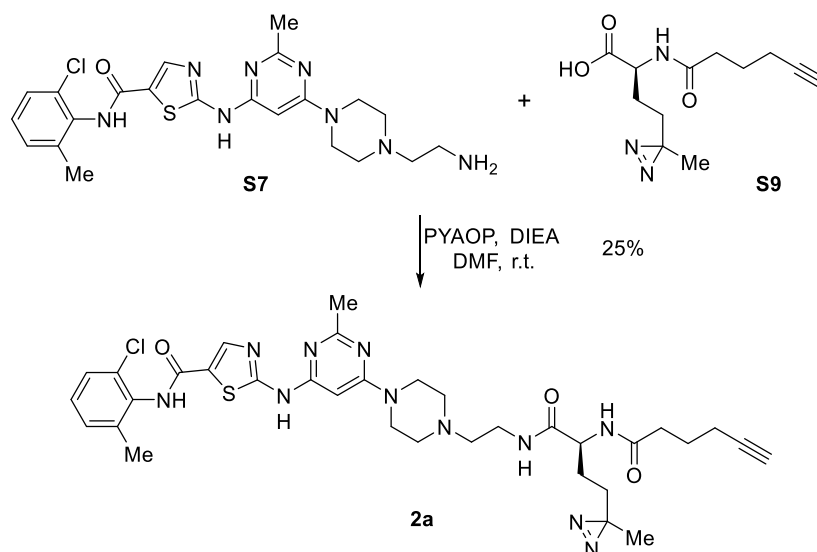

**Synthesis of 2a:** A solution of dasatinib amine·3TFA salt **S7** (27.1 mg, 0.033 mmol), diazirine acid **S9** (8.2 mg, 0.033 mmol), (7-azabenzotriazol-1-yloxy)tripyrrolidinophosphonium hexafluorophosphate (PyAOP; 17.01 mg, 0.033 mmol) and ethyldiisopropylamine (0.023 mL, 0.131 mmol) were combined in DMF (3 mL) and stirred for 2 h at r.t. The crude reaction mix was diluted

with 90% DMSO/water to 4 mL and purified on preparative HPLC. The eluents were A: 0.1% TFA-water; B: acetonitrile. 0-5 min isocratic followed by 1% increase in acetonitrile per min gradient. The appropriate fractions were collected and lyophilized to dryness to give the titled compound (7.7 mg, 25% yield):  $^1\text{H-NMR}$  (500 MHz,  $\text{DMSO-}d_6$ )  $\delta$  11.64 (s, 1H), 9.91 (s, 1H), 9.67 (brs, 1H), 8.24 (s, 1H), 8.21 (t,  $J = 5.7$  Hz, 1H), 8.10 (d,  $J = 7.3$  Hz, 1H), 7.40 (dd,  $J = 7.7$ , 1.4 Hz, 1H), 7.32 - 7.23 (m, 2H), 6.15 (s, 1H), 4.36 (brs, 1.6H), 4.12 - 4.04 (m, 1H), 3.60 (m, under the water signal), 3.29 - 3.06 (m, under the water signal), 3.01 (td,  $J = 6.6$ , 3.9 Hz, 1H), 2.79 (t,  $J = 2.6$  Hz, 1H), 2.45 (s, 3H), 2.26 - 2.20 (m, 5H), 2.15 (td,  $J = 7.2$ , 2.6 Hz, 2H), 1.76 - 1.71 (m, 1H), 1.69 - 1.62 (m, 2H), 1.54 - 1.22 (m, 4H), 0.99 (s, 3H); HRMS (ESI) calcd for  $\text{C}_{34}\text{H}_{42}\text{ClN}_{11}\text{O}_3\text{S}$  719.2960  $[\text{M}+\text{H}^+]$ , found 720.2950.

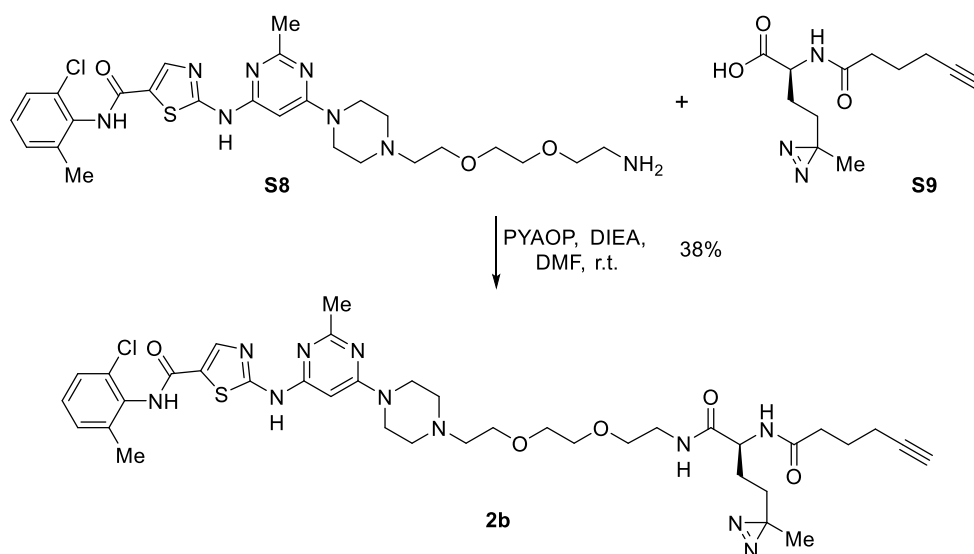

**Synthesis of 2b:** A solution of dasatinib amine-3TFA salt **S8** (10 mg, 10.90  $\mu\text{mol}$ ), diazirine acid **S9** (7.3 mg, 0.029 mmol), PyAOP (15.15 mg, 0.029 mmol) and ethyldiisopropylamine (0.020 mL, 0.116 mmol) were combined in DMF (3 mL) and stirred for 2 h at r.t. The crude reaction mix was diluted with 90% DMSO/water to 4 mL and purified preparative HPLC. The eluents were A: 0.1% TFA-water; B: acetonitrile. 0-5 min isocratic; 1%/min acetonitrile gradient. The appropriate fractions were collected and lyophilized to dryness to give the titled compound (8.8 mg, 38% yield):  $^1\text{H NMR}$  (500 MHz,  $\text{DMSO-}d_6$ )  $\delta$  11.64 (s, 1H), 9.91 (s, 1H), 9.79 (brs, 1H), 8.24 (s, 1H), 7.96 (d,  $J = 8.0$  Hz, 1H), 7.92 (t,  $J = 5.7$  Hz, 1H), 7.40 (dd,  $J = 7.7$ , 1.4 Hz, 1H), 7.32 - 7.24 (m, 2H), 6.15 (s, 1H), 4.35 (d,  $J = 12.5$  Hz, 2H), 4.15 (td,  $J = 8.2$ , 5.2 Hz, 1H), 3.81 - 3.75 (m, 2H), 3.64 - 3.54 (m, under the water signal), 3.32 - 3.07 (m, under the water signal), 3.04 - 2.98 (m, 1H), 2.78 (t,  $J = 2.7$  Hz, 1H), 2.45 (s, 3H), 2.24 (s, 3H), 2.20 (td,  $J = 7.2$ , 1.3 Hz, 2H), 2.13 (td,  $J = 7.2$ , 2.7 Hz, 2H), 1.76 - 1.71 (m, 1H), 1.69 - 1.60 (m, 2H), 1.52 - 1.21 (m, 5H), 0.97 (s, 3H); HRMS (ESI) calcd for  $\text{C}_{38}\text{H}_{51}\text{ClN}_{11}\text{O}_5\text{S}$  808.3485  $[\text{M}+\text{H}^+]$ , found 808.3477.

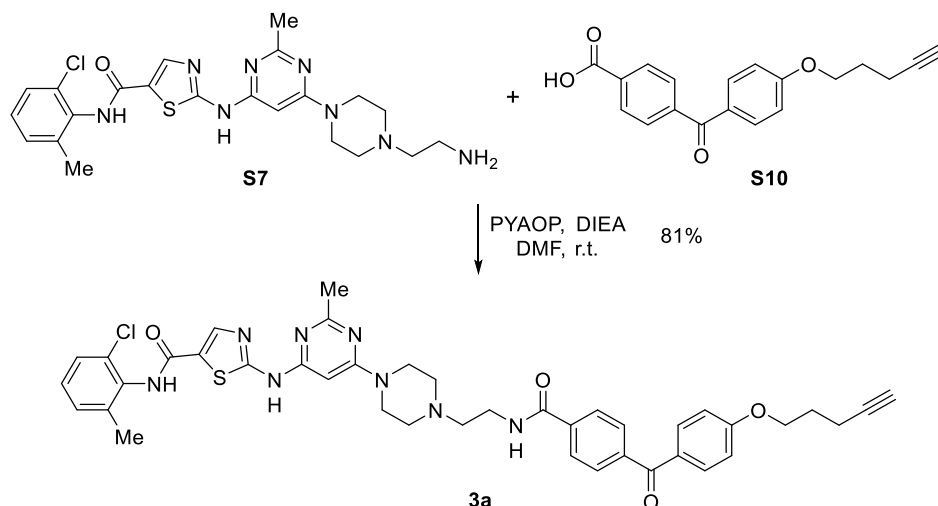

**Synthesis of 3a:** A solution of dasatinib amine-3TFA salt **S7** (30 mg, 0.036 mmol), benzoic acid **S10** (12.27 mg, 0.040 mmol), PyAOP (20.75 mg, 0.040 mmol) and ethyldiisopropylamine (0.025 mL, 0.145 mmol) were combined in DMF (3 mL) and stirred for 2 h at r.t. The crude reaction mix was diluted with 90% DMSO/water to 4 mL and purified preparative HPLC. The eluents were A: 0.1% TFA-water; B: acetonitrile. 0-5 min isocratic; 1% /min acetonitrile gradient after that point. The appropriate fractions were collected and lyophilized to dryness to give the titled compound (29.3 mg, 81% yield):  $^1\text{H}$  NMR (500 MHz,  $\text{DMSO}-d_6$ )  $\delta$  11.66 (brs, 1H), 9.92 (s, brs, 2H), 8.96 (t,  $J = 5.6$  Hz, 1H), 8.24 (s, 1H), 8.03 (d,  $J = 8.5$  Hz, 2H), 7.80 (d,  $J = 8.5$  Hz, 2H), 7.75 (d,  $J = 8.9$  Hz, 2H), 7.40 (dd,  $J = 7.6, 1.1$  Hz, 1H), 7.32 - 7.22 (m, 2H), 7.12 (d,  $J = 8.9$  Hz, 2H), 6.18 (s, 1H), 4.39 (brs, 2H), 4.16 (t,  $J = 6.2$  Hz, 2H), 3.77 – 3.66 (m, 4H), 3.44 – 3.35 (m, 2H), 3.34 - 3.20 (m, 2H), 3.17 (s, 2H), 2.84 (t,  $J = 2.6$  Hz, 1H), 2.46 (s, 3H), 2.36 (td,  $J = 7.1, 2.6$  Hz, 2H), 2.24 (s, 3H), 1.93 (p,  $J = 6.7$  Hz, 2H); HRMS (ESI) calcd for  $\text{C}_{41}\text{H}_{42}\text{ClN}_8\text{O}_4\text{S}$  777.2739  $[\text{M}+\text{H}^+]$ , found 777.2736.

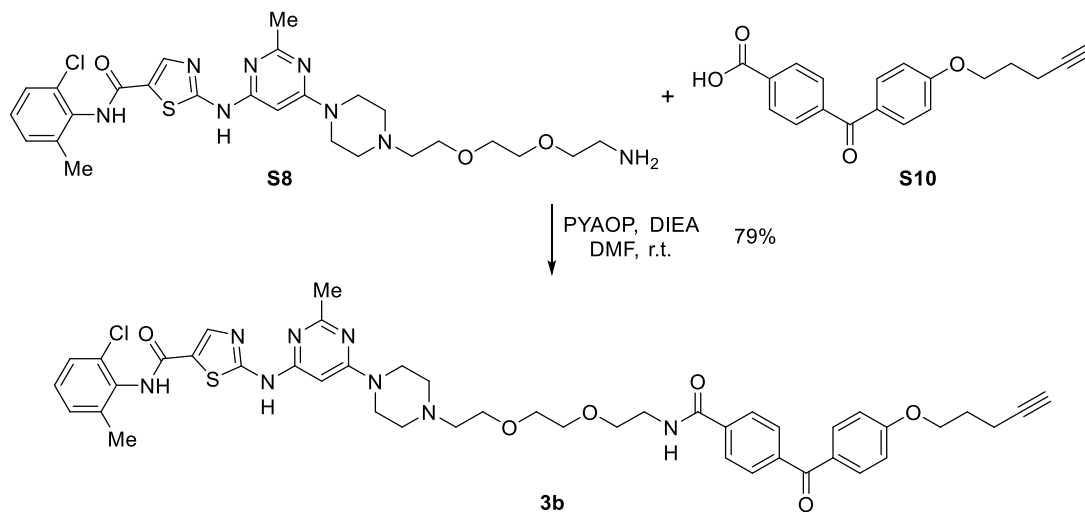

**Synthesis of 3b:** A solution of dasatinib amine-3TFA salt **S8** (30mg, 0.033 mmol), benzoic acid **S10** (11.09 mg, 0.036 mmol), PyAOP (18.76 mg, 0.036 mmol) and ethyldiisopropylamine (0.023 mL, 0.131 mmol) were combined in DMF (3 mL) and stirred for 2 hrs at r.t. The crude reaction

mix was diluted with 90% DMSO/water to 4 mL and purified on preparative HPLC. The eluents were A: 0.1% TFA-water; B: acetonitrile. 0-5 min isocratic; 1% /min acetonitrile gradient after that point. The appropriate fractions were collected and lyophilized to dryness to give the titled compound (28.4 mg, 79% yield):  $^1\text{H}$  NMR (500 MHz,  $\text{DMSO}-d_6$ )  $\delta$  11.65 (brs, 1H), 10.06 (brs, 1H), 9.92 (s, 1H), 8.74 (t,  $J = 5.5$  Hz, 1H), 8.24 (s, 1H), 8.00 (d,  $J = 8.3$  Hz, 2H), 7.75 (d,  $J = 8.3$  Hz, 2H), 7.72 (d,  $J = 8.8$  Hz, 2H), 7.40 (d,  $J = 6.7$  Hz, 1H), 7.31 - 7.19 (m, 2H), 7.08 (d,  $J = 8.8$  Hz, 2H), 6.16 (s, 1H), 4.33 (brs, 2H), 4.13 (t,  $J = 6.2$  Hz, 2H), 3.83 - 3.74 (m, 2H), 3.66 - 3.53 (m, 8H), 3.52 - 3.43 (m, 2H), 3.34 (s, 2H), 3.26 (brs, 2H), 3.17 (s, 2H), 3.10 (s, 2H), 2.82 (t,  $J = 2.6$  Hz, 1H), 2.43 (s, 3H), 2.34 (td,  $J = 7.0, 2.6$  Hz, 2H), 2.24 (s, 3H), 1.92 (p,  $J = 6.6$  Hz, 2H); HRMS (ESI) calcd for  $\text{C}_{45}\text{H}_{49}\text{ClN}_8\text{O}_6\text{S}$  865.3263  $[\text{M}+\text{H}^+]$ , found 865.3278.

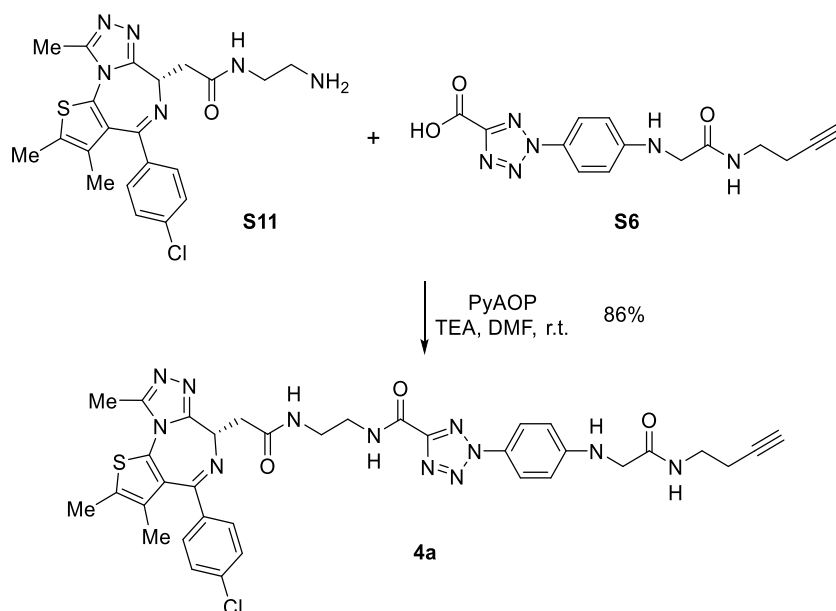

**Synthesis of 4a:** A solution of (+)-JQ-1 amine-TFA salt **S11** (10.0 mg, 0.018 mmol), tetrazole carboxylic acid **S6** (6.2 mg, 0.020 mmol), PyAOP (11.2 mg, 0.022 mmol), and triethylamine (6.3  $\mu\text{L}$ , 0.045 mmol) in 150  $\mu\text{L}$  DMF was stirred at r.t. for 2 h. The reaction mixture was applied to a medium-pressure silica gel flash chromatography system equipped with an automatic fraction collector running the  $\text{MeOH}/\text{CH}_2\text{Cl}_2$  (1:99 $\rightarrow$ 10:90) eluent gradient. The suitable fractions were pooled and evaporated under reduced pressure. The residue was re-dissolved in 3 mL MeCN and 3 mL  $\text{H}_2\text{O}$  containing 0.5% TFA, and the solution was lyophilized to dryness to give the titled compound as a white powder (11.4 mg, 86% yield):  $R_f = 0.40$  ( $\text{MeOH}/\text{CH}_2\text{Cl}_2 = 1:10$ ):  $^1\text{H}$  NMR (500 MHz,  $\text{CD}_3\text{OD}$ )  $\delta$  7.89 (d,  $J = 8.9$  Hz, 2H), 7.39 (d,  $J = 8.4$  Hz, 2H), 7.35 (d,  $J = 8.5$  Hz, 2H), 6.76 (d,  $J = 8.9$  Hz, 2H), 4.65 (dd,  $J = 8.0, 6.2$  Hz, 1H), 3.85 (s, 2H), 3.63 (t,  $J = 5.4$  Hz, 2H), 3.56 (t,  $J = 5.4$  Hz, 2H), 3.46 - 3.33 (m, 4H), 3.21 (q,  $J = 7.3$  Hz, 1H), 2.66 (s, 3H), 2.40 (s, 3H), 2.37 (td,  $J = 6.8, 2.3$  Hz, 2H), 2.25 (s, 1H), 1.62 (s, 3H); HRMS (ESI) calcd for  $\text{C}_{35}\text{H}_{36}\text{ClN}_{12}\text{O}_3\text{S}$  739.2437  $[\text{M}+\text{H}^+]$ , found 739.2419. The product purity was verified by analytical HPLC.

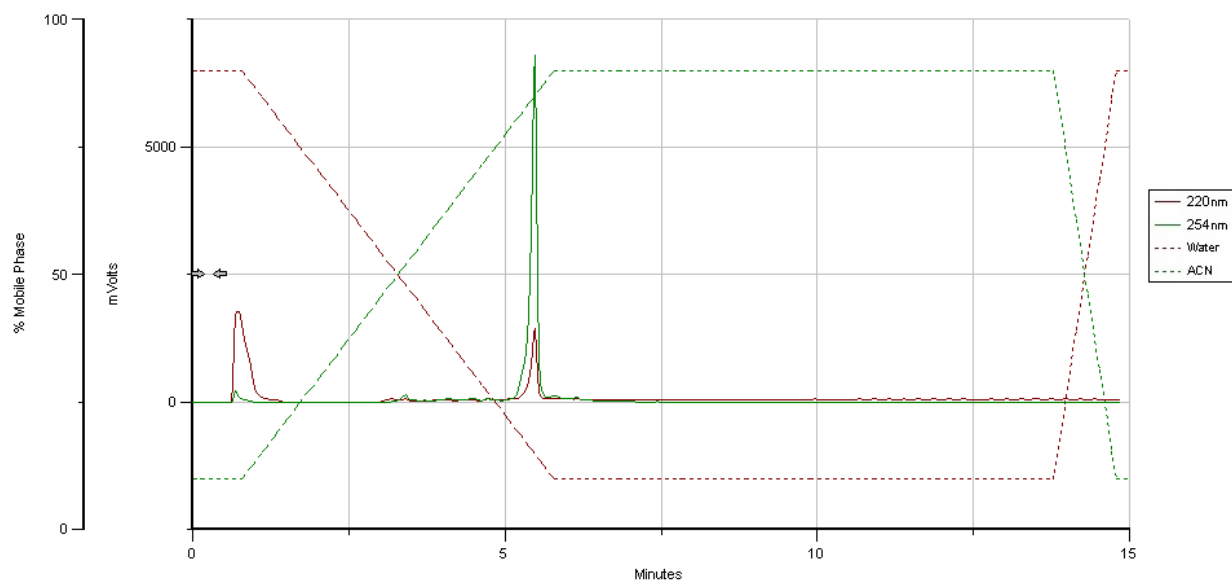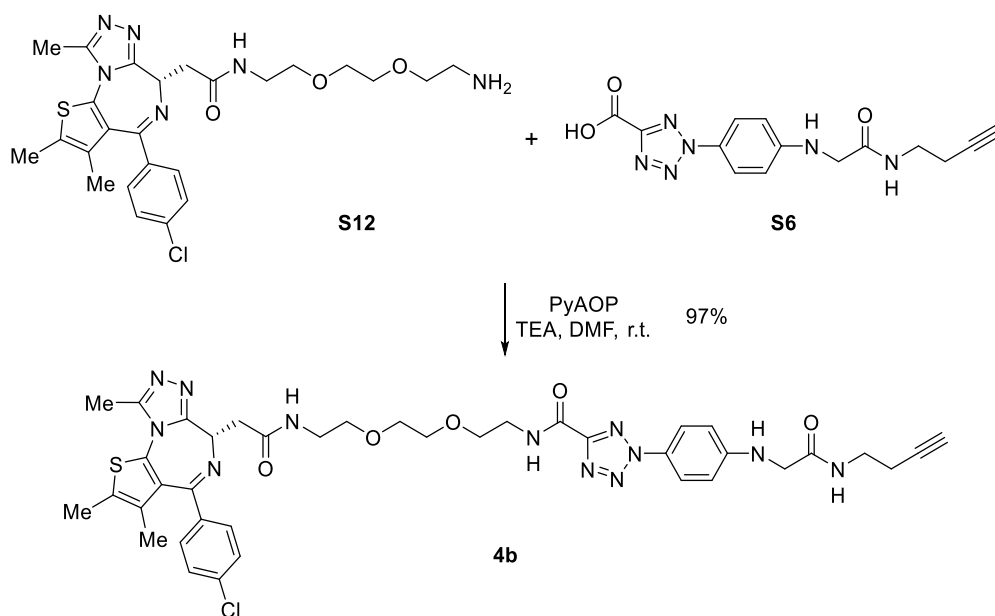

**Synthesis of 4b:** A solution of (+)-JQ-1 amine·TFA salt **S12** (10.0 mg, 0.016 mmol), tetrazole carboxylic acid **S6** (5.4 mg, 0.017 mmol), PyAOP (9.7 mg, 0.019 mmol), and triethylamine (5.4  $\mu\text{L}$ , 0.039 mmol) in 150  $\mu\text{L}$  DMF was stirred at r.t. for 4 h. The reaction mixture was applied to a medium-pressure silica gel flash chromatography system equipped with an automatic fraction collector running the MeOH/ $\text{CH}_2\text{Cl}_2$  (1:99 $\rightarrow$ 10:90) eluent gradient. The suitable fractions were pooled and evaporated under reduced pressure. The residue was re-dissolved in 3 mL MeCN and 3 mL  $\text{H}_2\text{O}$  containing 0.5% TFA, and the solution was lyophilized to dryness to give the titled compound as a white powder (12.8 mg, 97% yield):  $R_f$  = 0.36 (MeOH/ $\text{CH}_2\text{Cl}_2$  = 1:10);  $^1\text{H}$  NMR (500 MHz,  $\text{CD}_3\text{OD}$ )  $\delta$  7.86 (d,  $J$  = 8.9 Hz, 2H), 7.43 (d,  $J$  = 8.4 Hz, 2H), 7.38 (d,  $J$  = 8.5 Hz, 2H), 6.73 (d,  $J$  = 8.9 Hz, 2H), 4.64 (dd,  $J$  = 8.7, 5.4 Hz, 1H), 4.58 (s, 0.6H), 3.83 (s, 2H), 3.75 – 3.59 (m, 11H), 3.50 – 3.40 (m, 3H), 3.39 – 3.32 (m, under the solvent signal), 2.67 (s, 3H), 2.42 (s, 3H), 2.37 (td,  $J$  = 6.8, 2.5 Hz, 2H), 2.25 (t,  $J$  = 2.4 Hz, 1H), 1.66 (s, 3H); HRMS (ESI) calcd for

$C_{39}H_{44}ClN_{12}O_5S$  827.2961  $[M+H]^+$ , found 827.2946. The product purity was also verified by analytical HPLC.

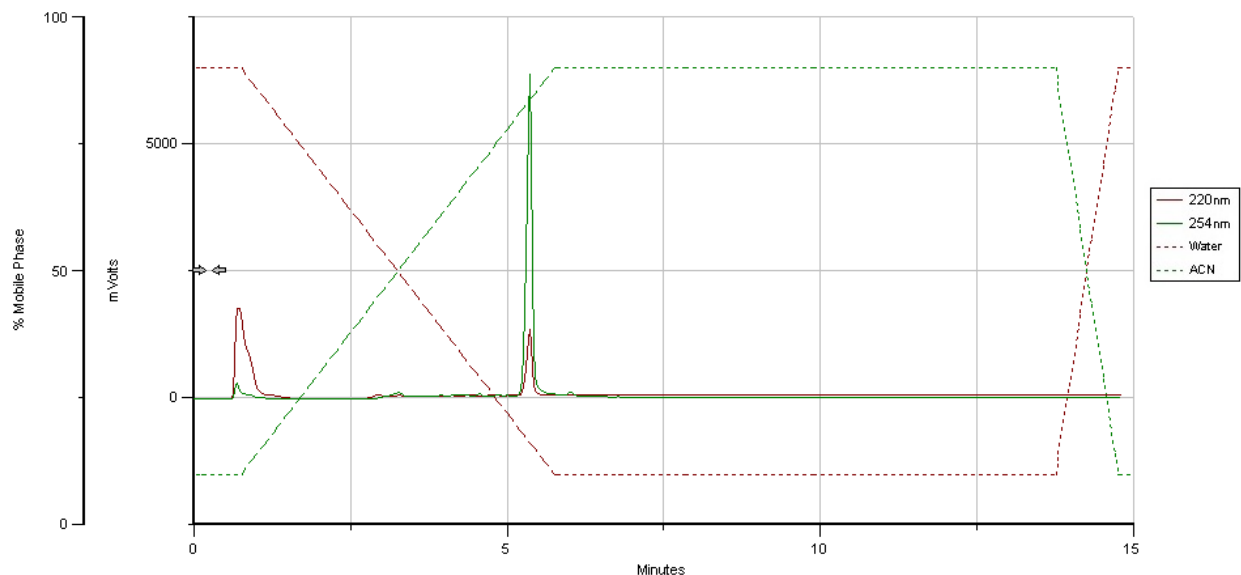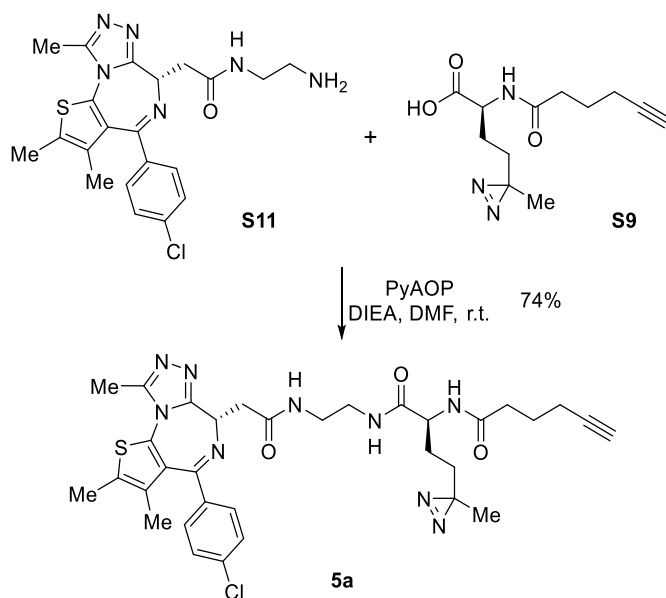

**Synthesis of 5a:** A solution of (+)-JQ-1 amine·TFA salt **S11** (20 mg, 0.036 mmol), diazirine acid **S9** (12.21 mg, 0.049 mmol), PyAOP (28.1 mg, 0.054 mmol) and ethyldiisopropylamine (0.025 mL, 0.144 mmol) were combined in DMF (2 mL) and stirred for 2 h at r.t. The crude reaction mix was diluted with 90% DMSO/water to 4 mL and purified on preparative HPLC. The eluents were A: 0.1% TFA-water; B: acetonitrile. 0-5 min isocratic; 1% /min acetonitrile gradient after that point. The appropriate fractions were collected and lyophilized to dryness to give the titled compound (18 mg, 74% yield):  $^1\text{H}$  NMR (500 MHz,  $\text{DMSO}-d_6$ )  $\delta$  8.20 (s, 1H), 7.95 (d,  $J = 7.8$  Hz, 1H), 7.90 (t,  $J = 5.0$  Hz, 1H), 7.48 (d,  $J = 8.7$  Hz, 2H), 7.42 (d,  $J = 8.5$  Hz, 2H), 4.52 (t,  $J = 7.1$  Hz, 1H), 4.10 (td,  $J = 8.0, 5.2$  Hz, 1H), 3.24 (d,  $J = 7.1$  Hz, 2H), 3.20 – 3.08 (m, 4H), 2.73 (t,

$J = 2.6$  Hz, 1H), 2.60 (s, 3H), 2.40 (s, 3H), 2.20 (t,  $J = 7.5$  Hz, 2H), 2.11 (td,  $J = 7.1, 2.6$  Hz, 2H), 1.67 – 1.58 (m, 5H), 1.54–1.45 (m, 1H), 1.38 – 1.21 (m, 3H), 0.94 (s, 3H); HRMS (ESI) calcd for  $C_{33}H_{39}ClN_9O_3SNa$  698.2405  $[M+Na^+]$ , found 698.2422.

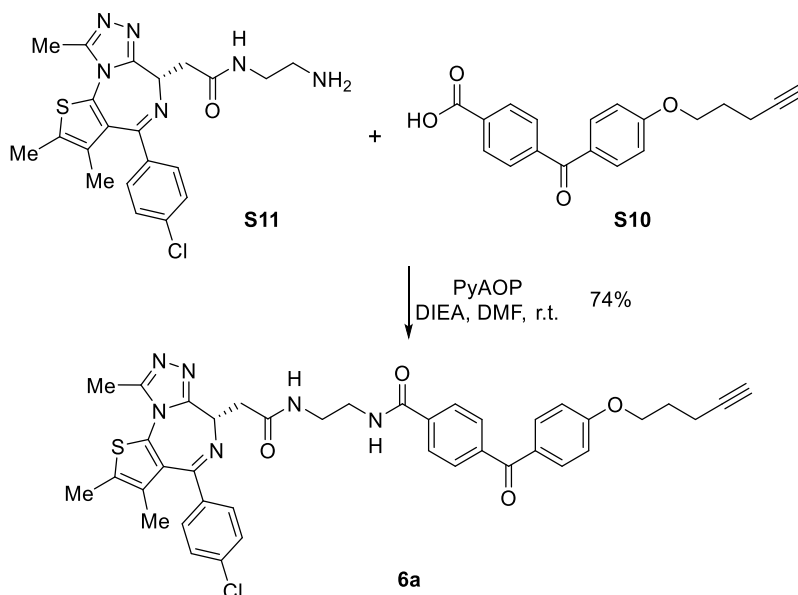

**Synthesis of 6a:** A solution of (+)-JQ-1 amine-TFA salt **S11** (25 mg, 0.045 mmol), benzoic acid **S10** (15.22 mg, 0.049 mmol), PyAOP (25.7 mg, 0.049 mmol) and ethyldiisopropylamine (0.031 mL, 0.180 mmol) were combined in DMF (3 mL) and stirred for 2 h at r.t. The crude reaction mix was diluted with 90% DMSO/water to 4 mL and purified on preparative HPLC. The eluents were A: 0.1% TFA-water; B: acetonitrile. 0–5 min isocratic; 1% /min acetonitrile gradient after that point. The appropriate fractions were collected and lyophilized to dryness to give the titled compound (24 mg, 74% yield):  $^1H$  NMR (500 MHz,  $DMSO-d_6$ )  $\delta$  8.66 (t,  $J = 5.2$  Hz, 1H), 8.41 (t,  $J = 5.6$  Hz, 1H), 7.98 (d,  $J = 8.3$  Hz, 2H), 7.77 – 7.73 (m, 4H), 7.46 (d,  $J = 8.7$  Hz, 2H), 7.42 (d,  $J = 8.6$  Hz, 2H), 7.12 (d,  $J = 8.8$  Hz, 2H), 4.55 (t,  $J = 7.1$  Hz, 1H), 4.17 (t,  $J = 6.2$  Hz, 2H), 3.42 – 3.22 (m, under the water signal), 2.84 (t,  $J = 2.6$  Hz, 1H), 2.59 (s, 3H), 2.41 (s, 3H), 2.37 (td,  $J = 7.1, 2.6$  Hz, 2H), 1.95 (p,  $J = 6.5$  Hz, 2H), 1.60 (s, 3H); HRMS (ESI) calcd for  $C_{40}H_{37}ClN_6O_4S$  733.2365  $[M+H^+]$ , found 733.2354.

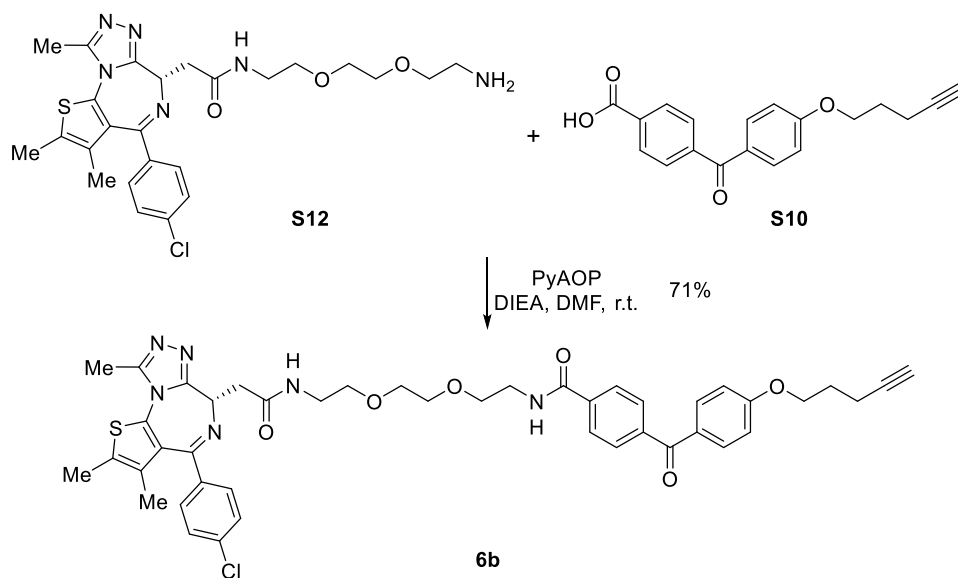

**Synthesis of 6b:** A solution of (+)-JQ-1 amine·TFA salt **S12** (25 mg, 0.033 mmol), benzoic acid **S10** (11.17 mg, 0.036 mmol), PyAOP (18.89 mg, 0.036 mmol) and ethyldiisopropylamine (0.023 mL, 0.132 mmol) were combined in DMF (3 mL) and stirred for 2 h at r.t. The crude reaction mix was diluted with 90% DMSO/water to 4 mL and purified on preparative HPLC. The eluents were A: 0.1% TFA-water; B: acetonitrile. 0-5 min isocratic; 1% /min acetonitrile gradient after that point. The appropriate fractions were collected and lyophilized to dryness to give the titled compound (19.1 mg, 71% yield):  $^1\text{H}$  NMR (500 MHz,  $\text{DMSO}-d_6$ )  $\delta$  8.64 (t,  $J = 5.2$  Hz, 1H), 8.40 (t,  $J = 5.6$  Hz, 1H), 7.96 (d,  $J = 8.3$  Hz, 2H), 7.77 – 7.70 (m, 4H), 7.45 (d,  $J = 8.7$  Hz, 2H), 7.40 (d,  $J = 8.6$  Hz, 2H), 7.10 (d,  $J = 8.8$  Hz, 2H), 4.53 (t,  $J = 7.1$  Hz, 1H), 4.16 (t,  $J = 6.2$  Hz, 2H), 3.40 – 3.22 (m, under the water signal), 2.82. (t,  $J = 2.6$  Hz, 1H), 2.58 (s, 3H), 2.39 (s, 3H), 2.35 (td,  $J = 7.1, 2.6$  Hz, 2H), 1.93 (p,  $J = 6.5$  Hz, 2H), 1.58 (s, 3H); HRMS (ESI) calcd for  $\text{C}_{44}\text{H}_{45}\text{ClN}_6\text{O}_6\text{SNa}$  843.2708  $[\text{M}+\text{Na}^+]$ , found 843.2701.

# <sup>1</sup>H and <sup>13</sup>C NMR spectra

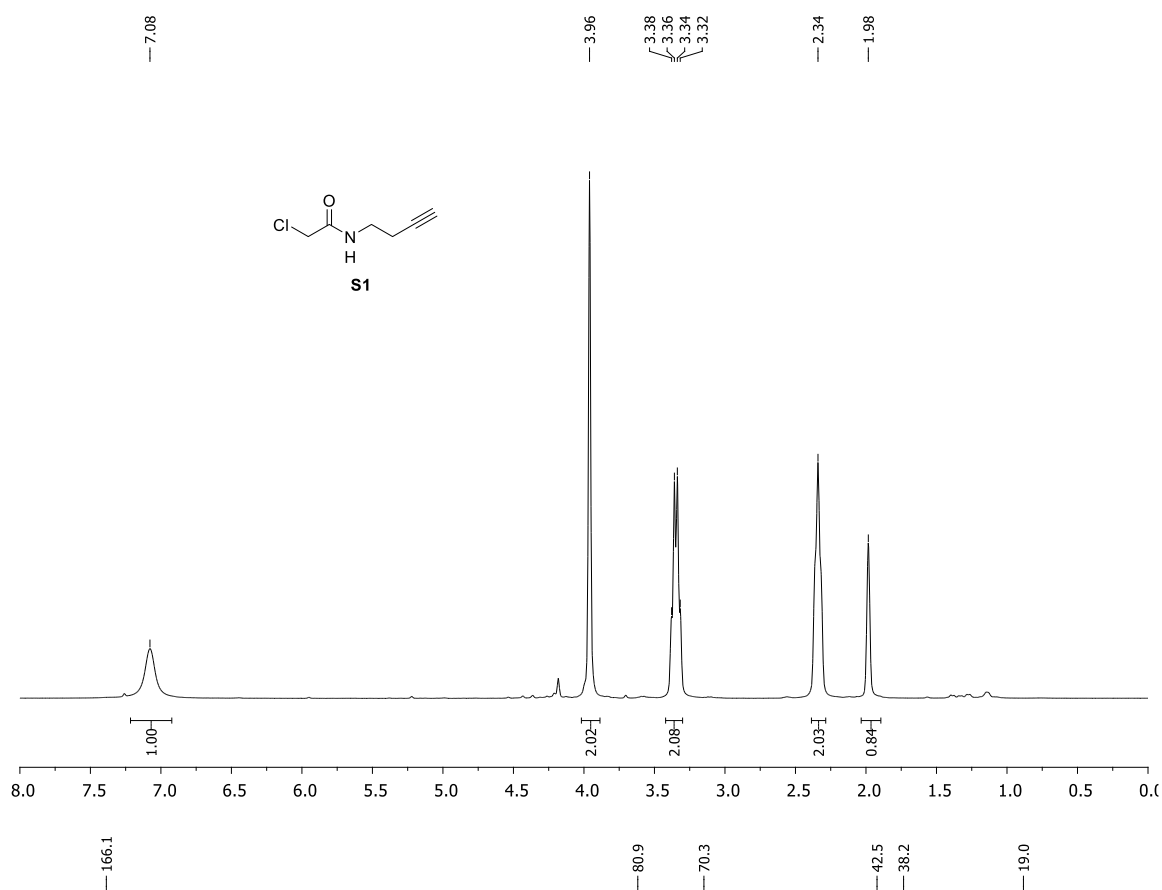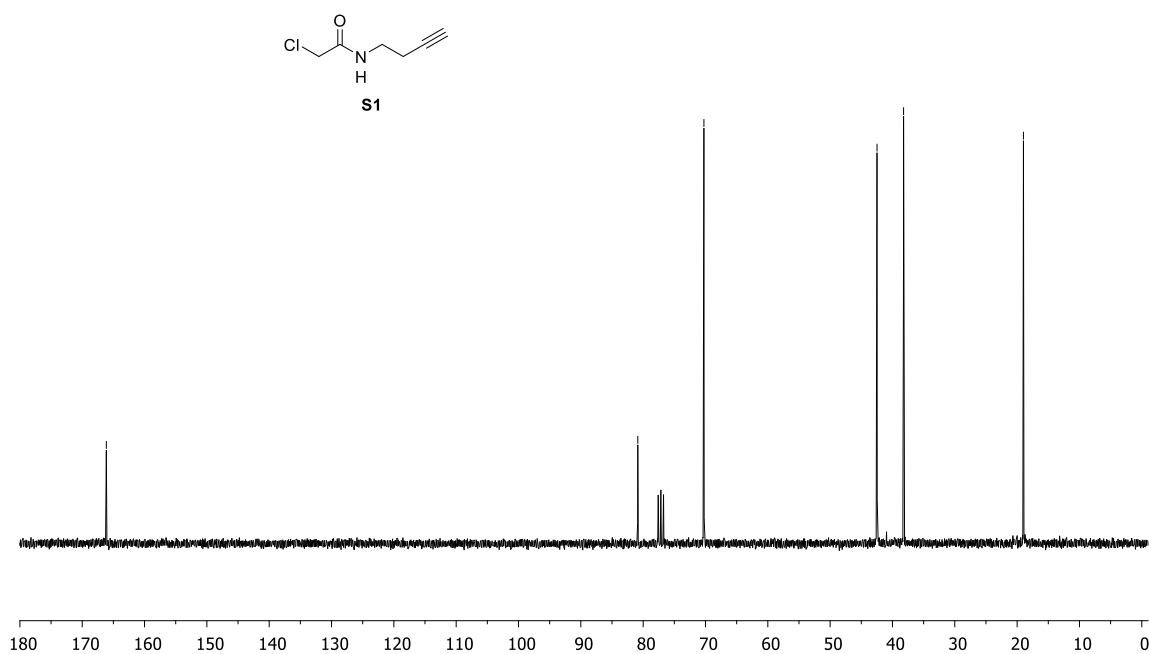

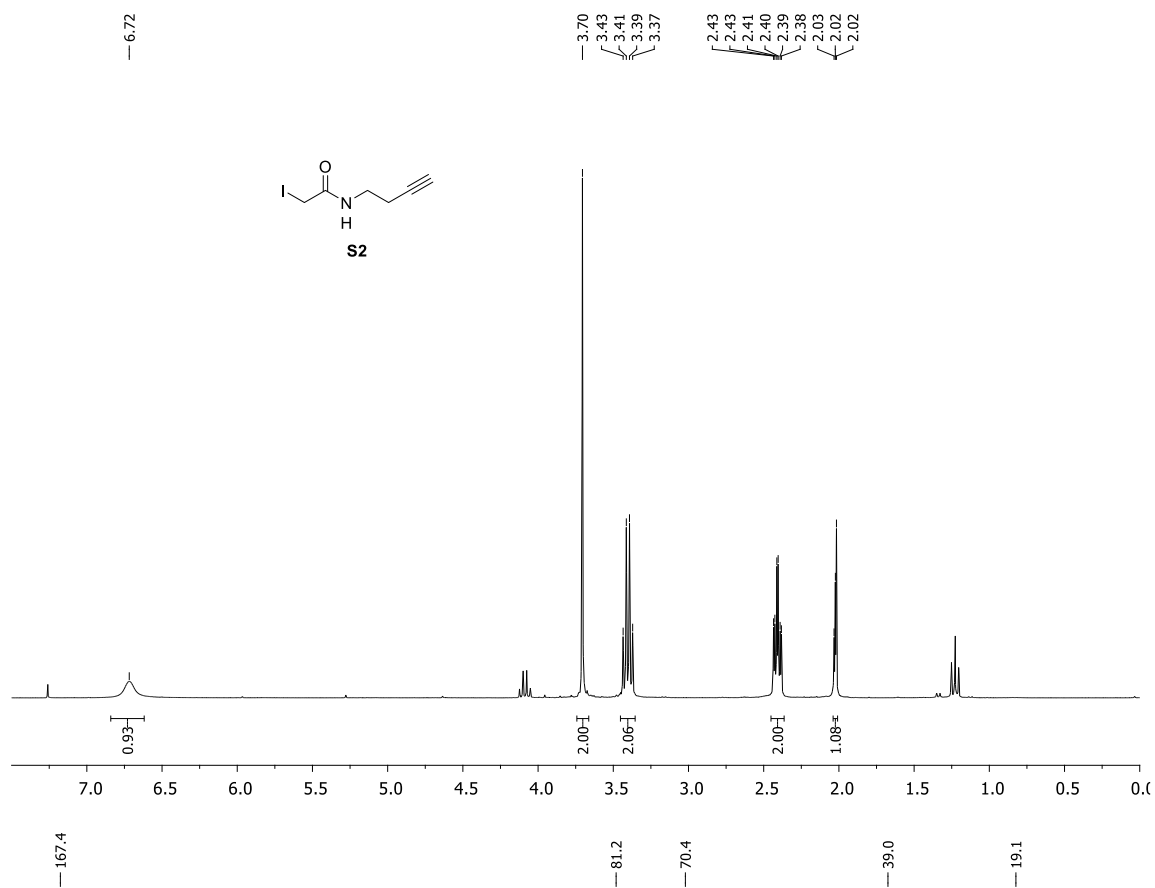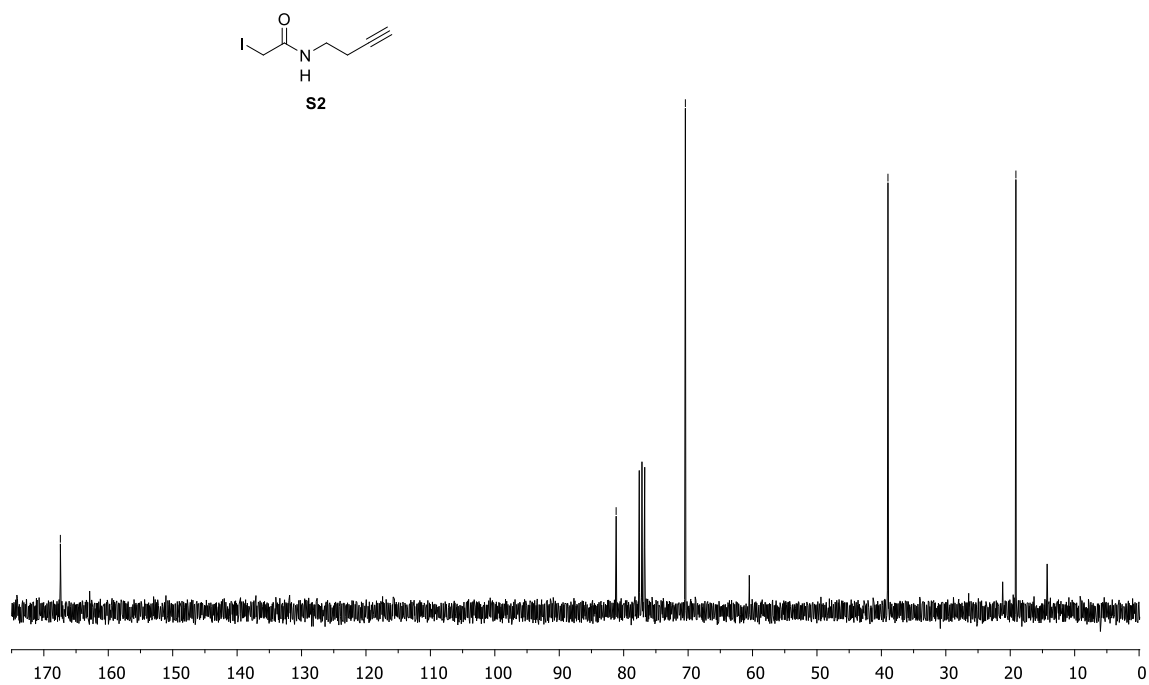

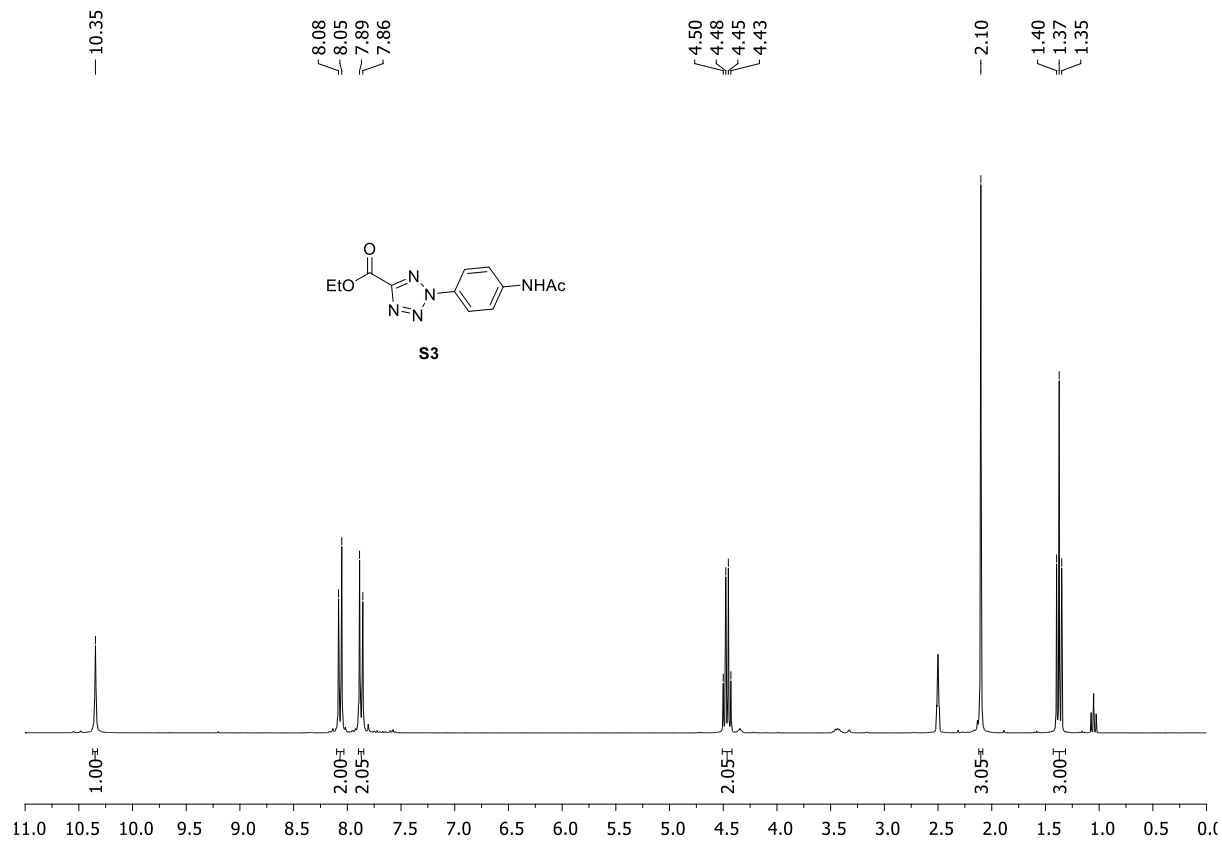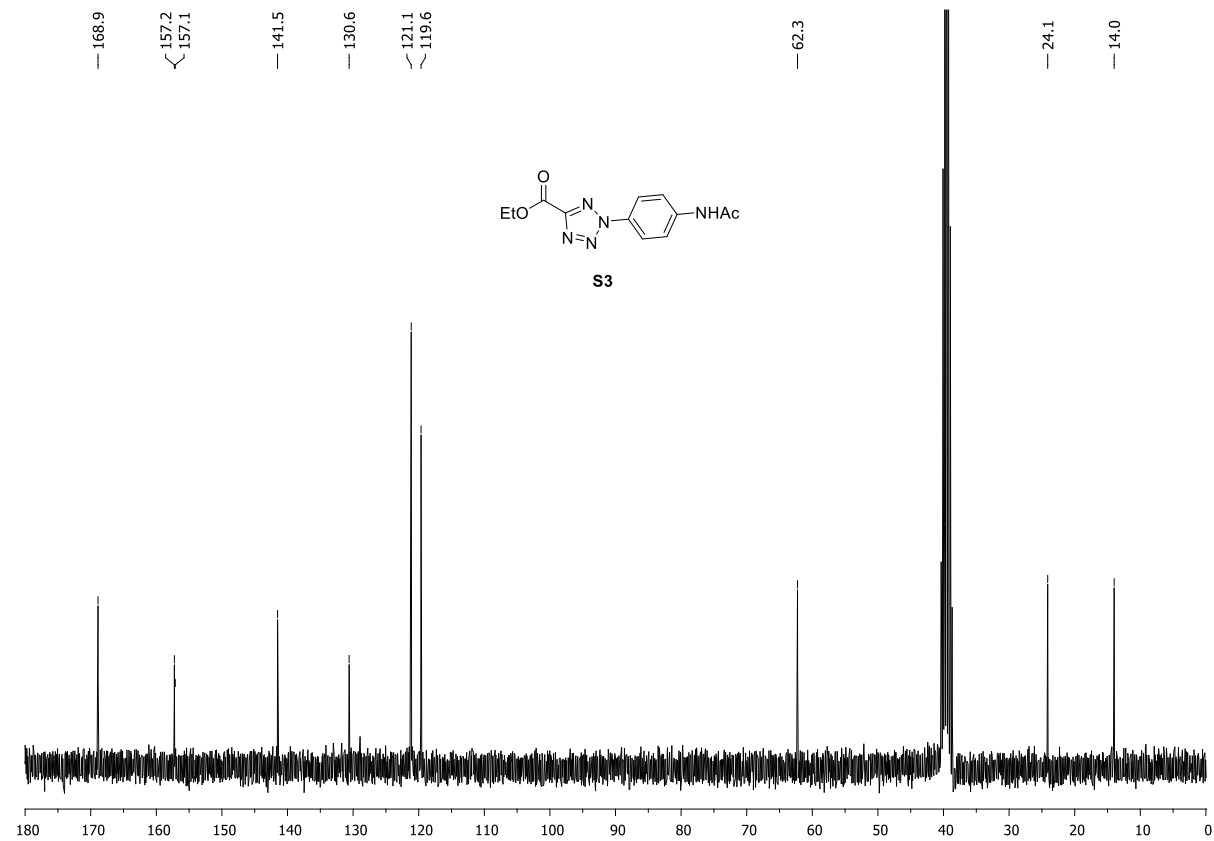

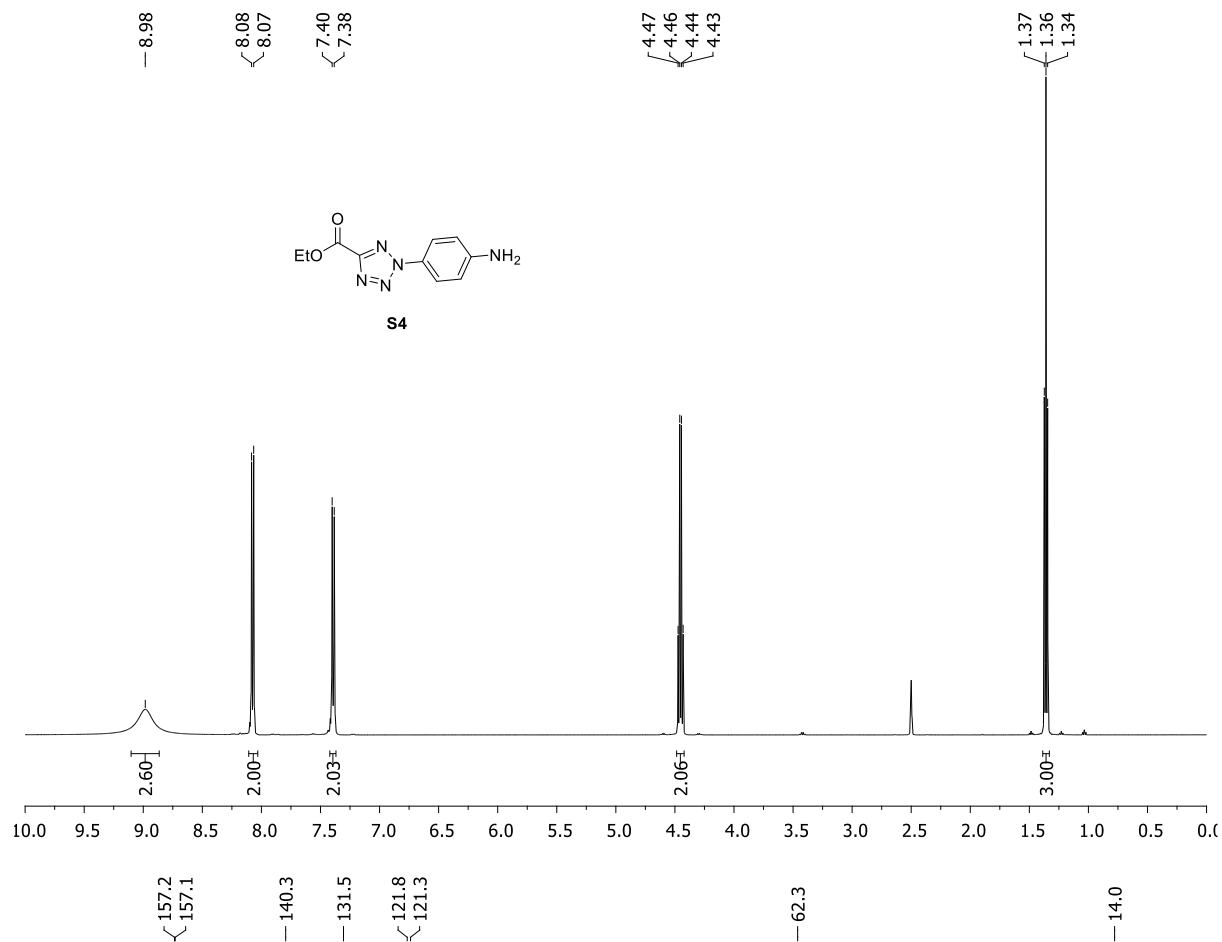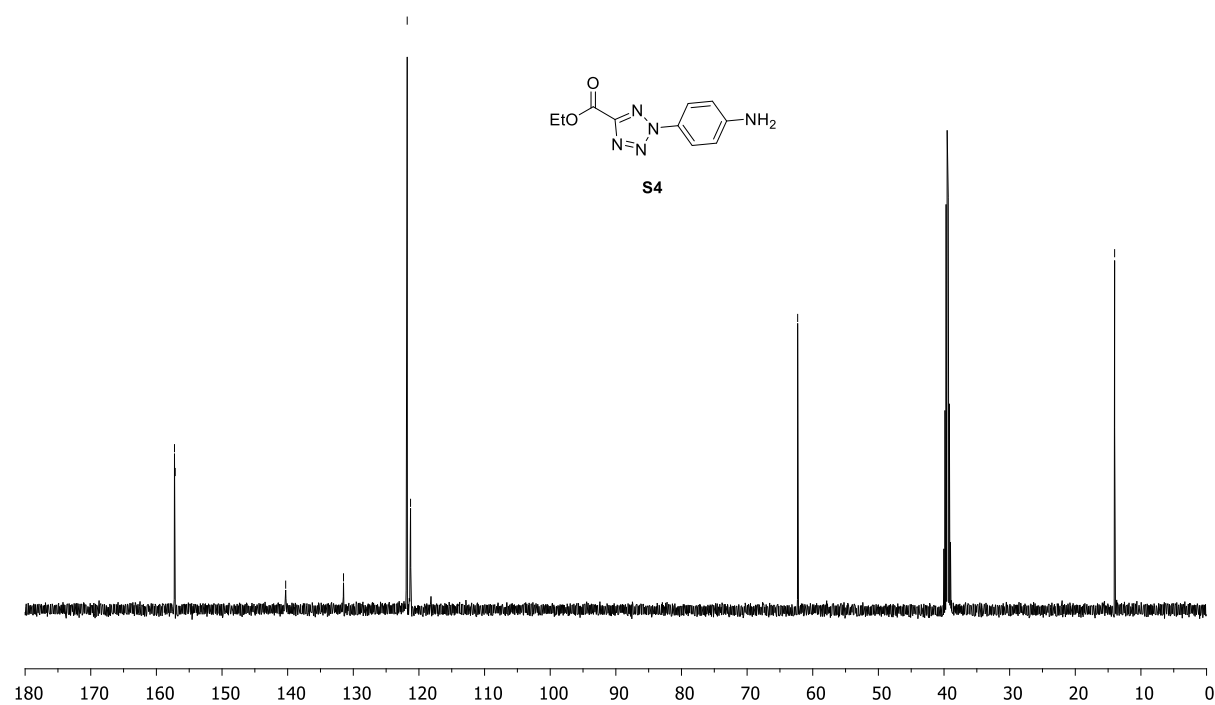

S41

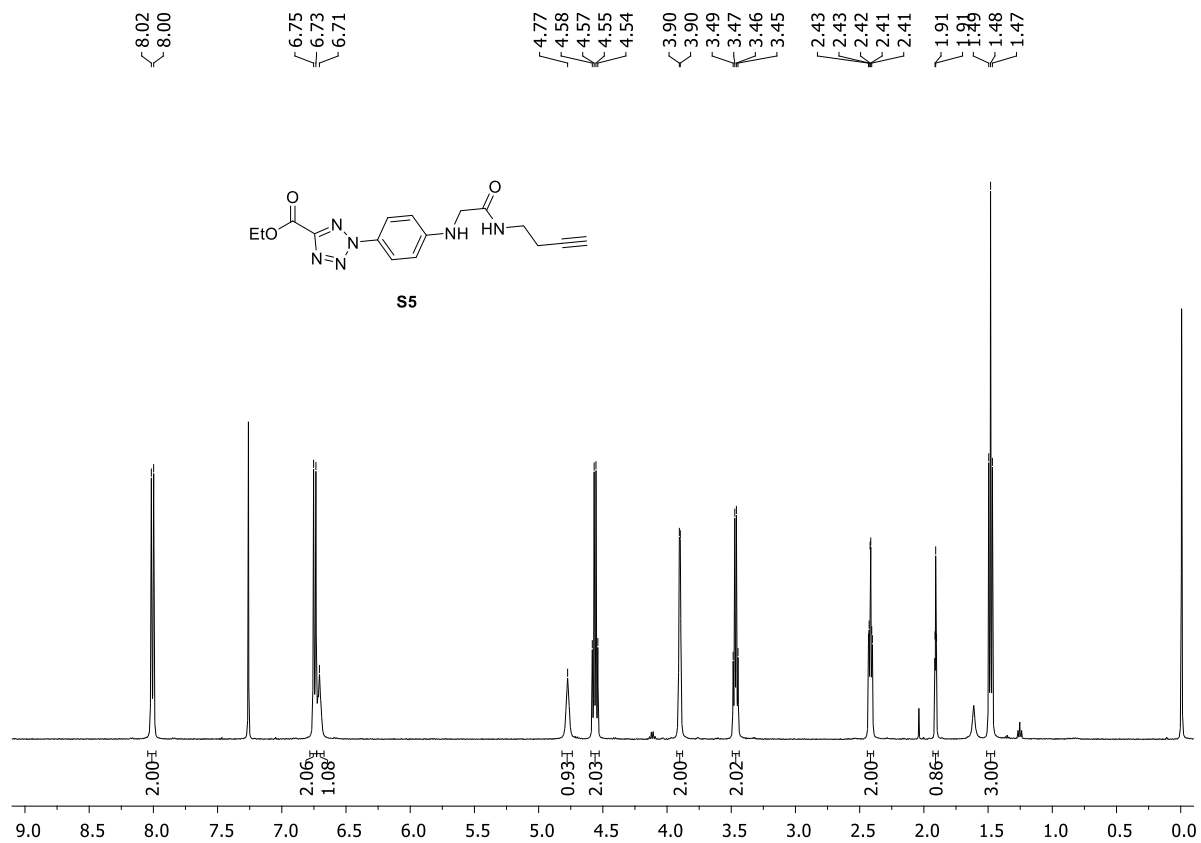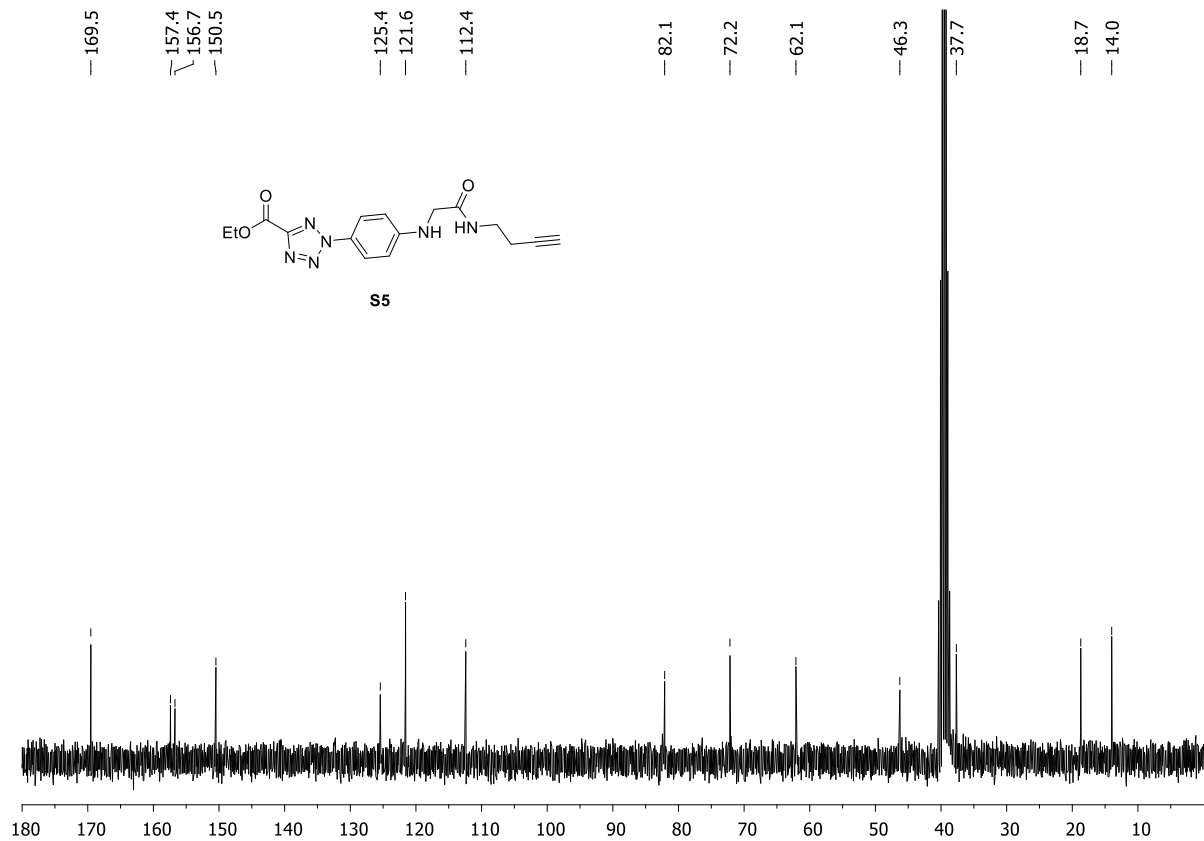

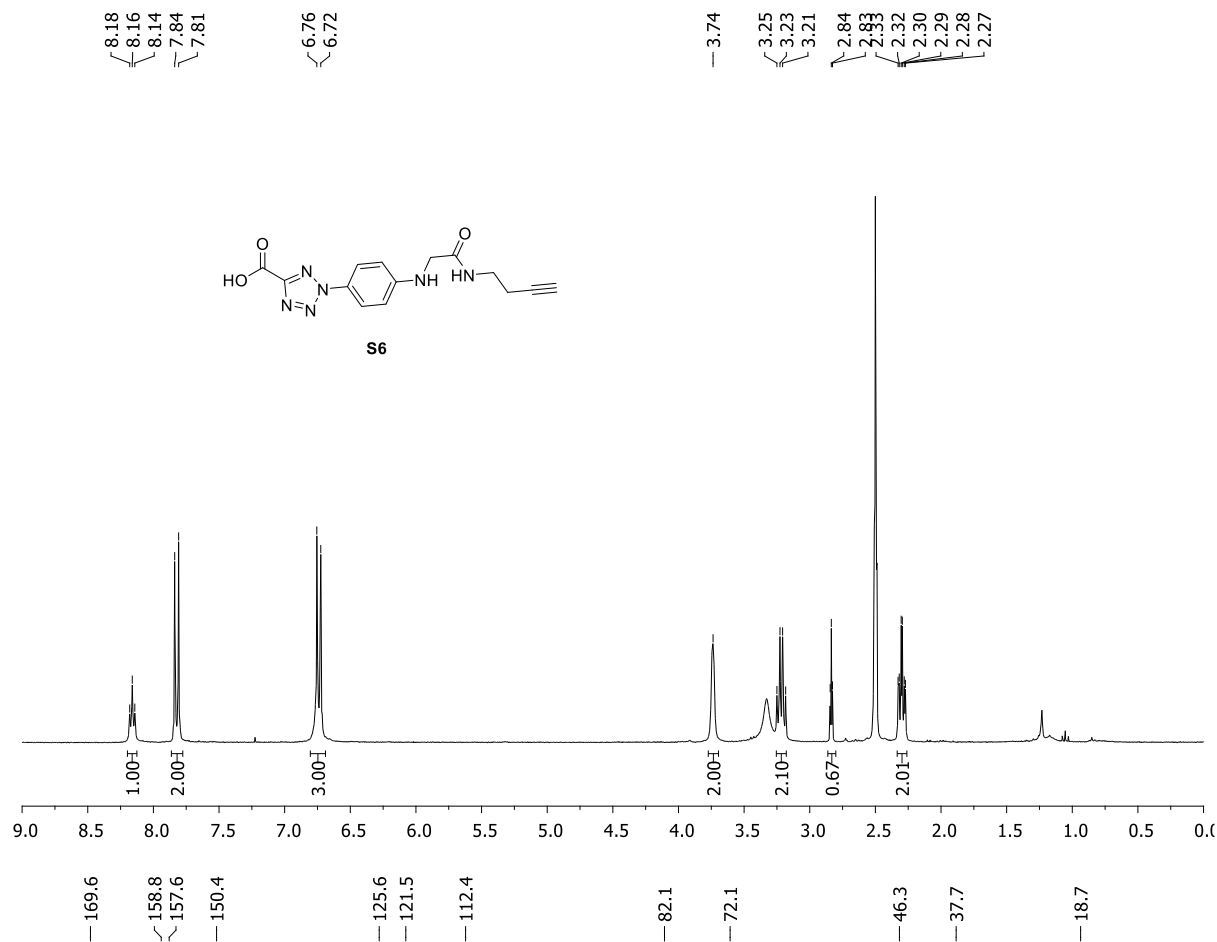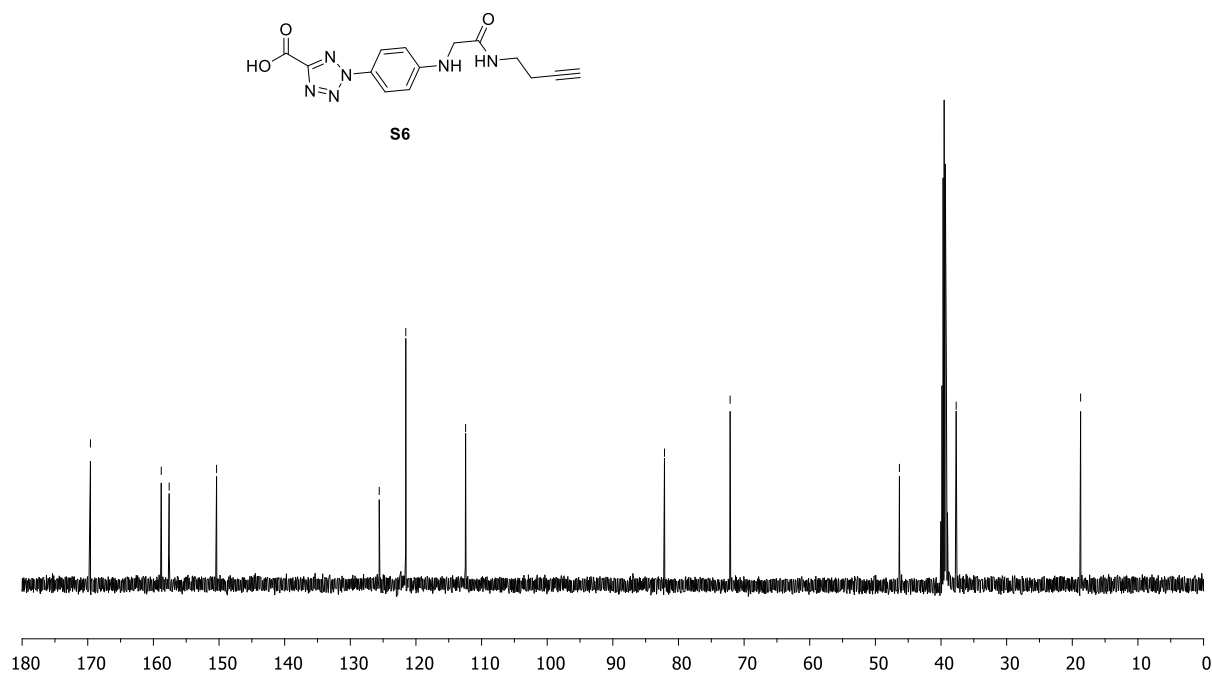

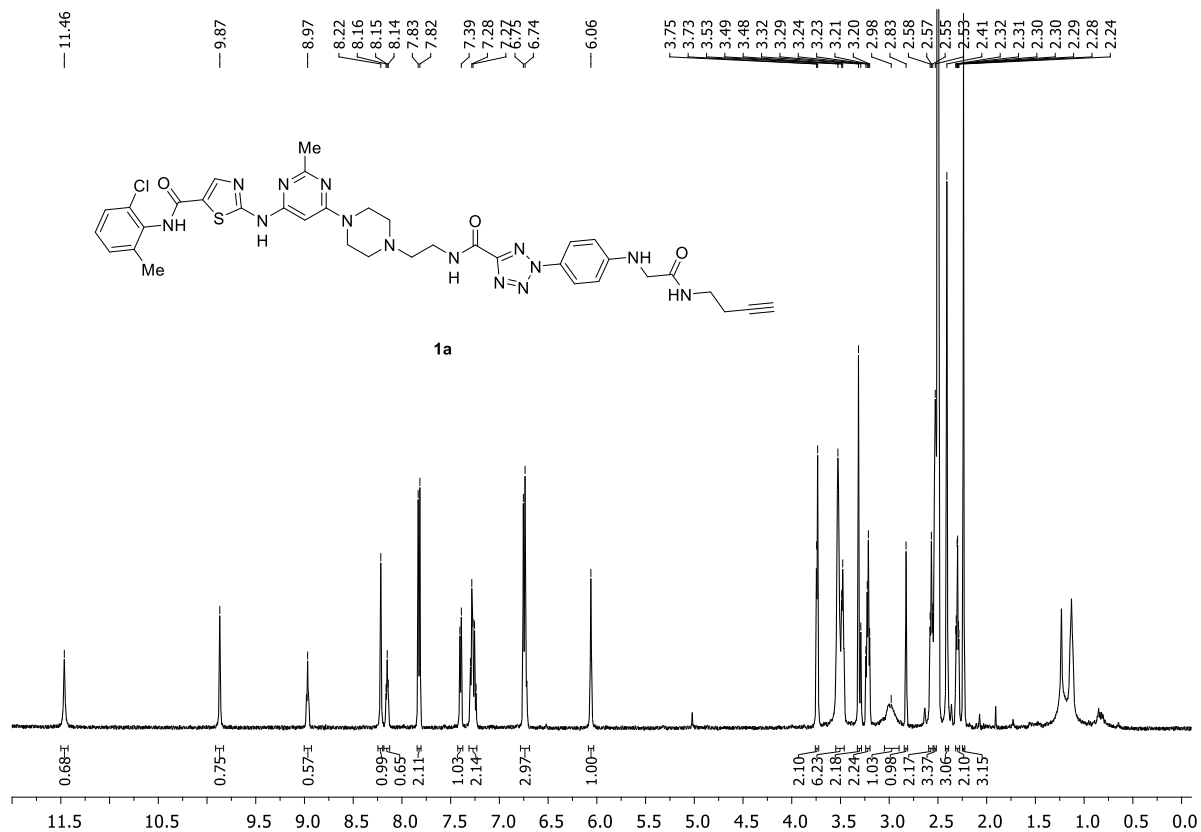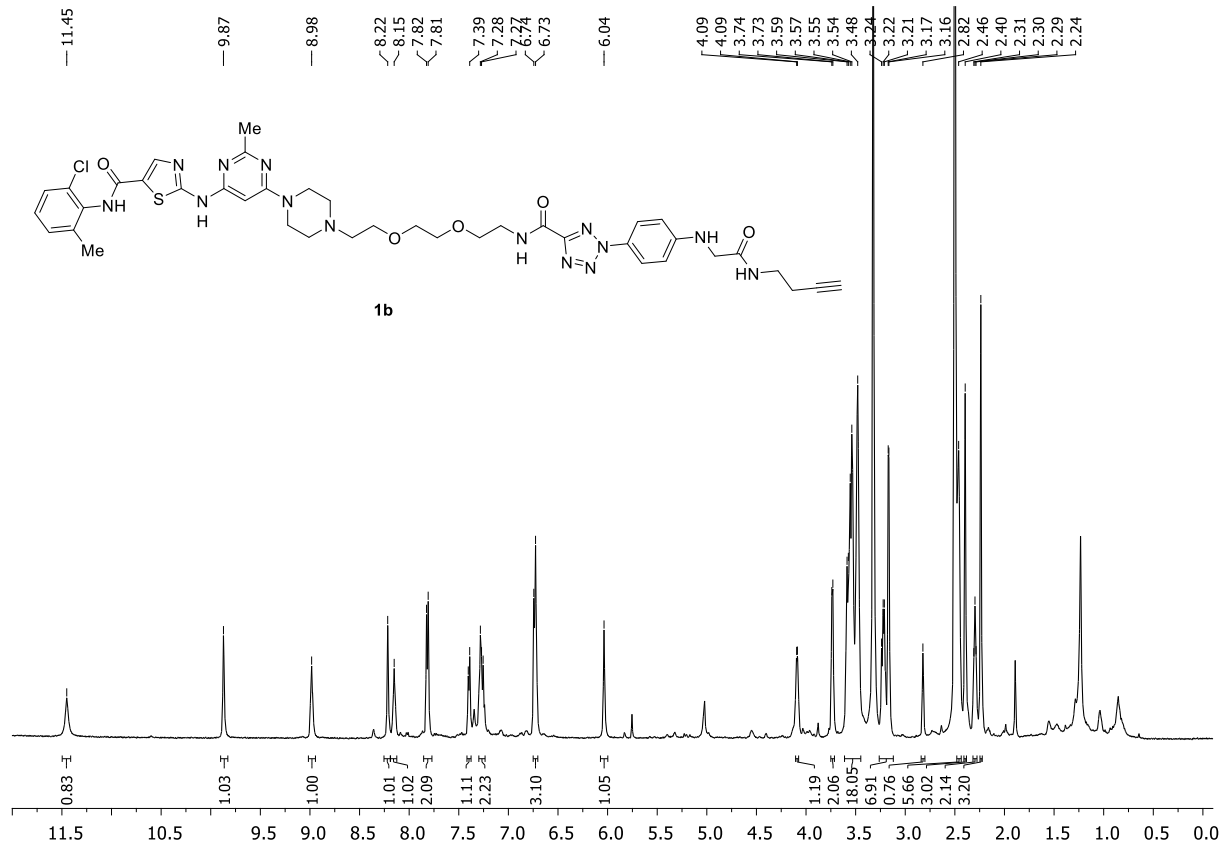

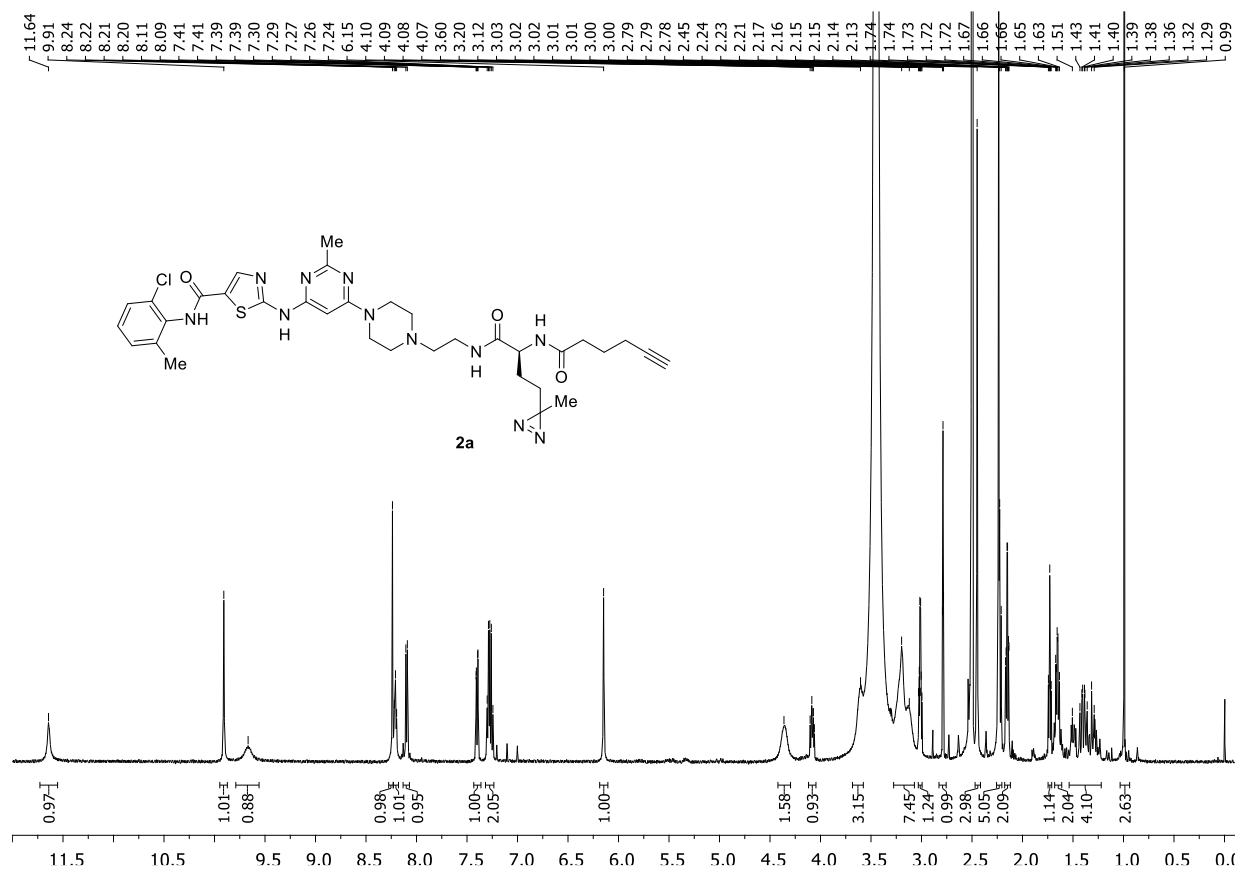

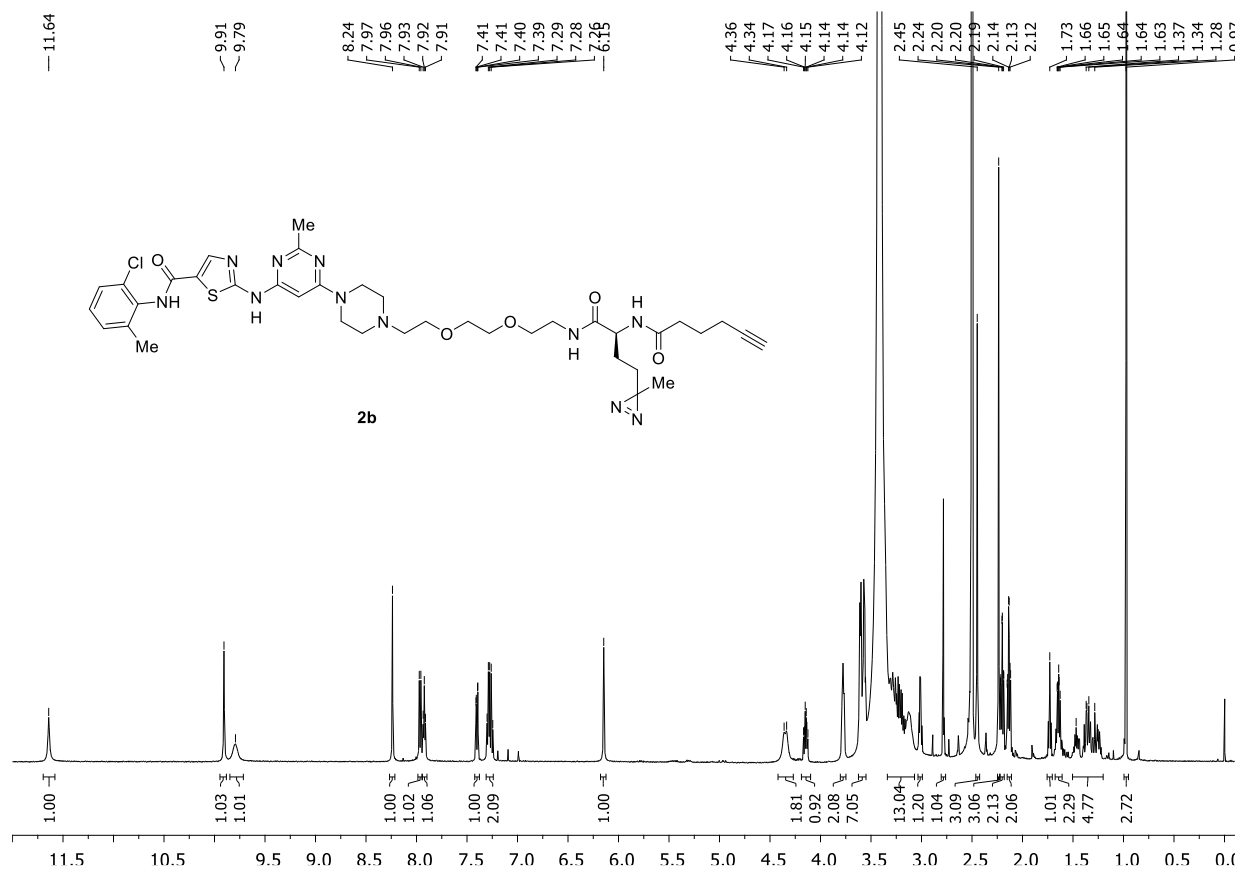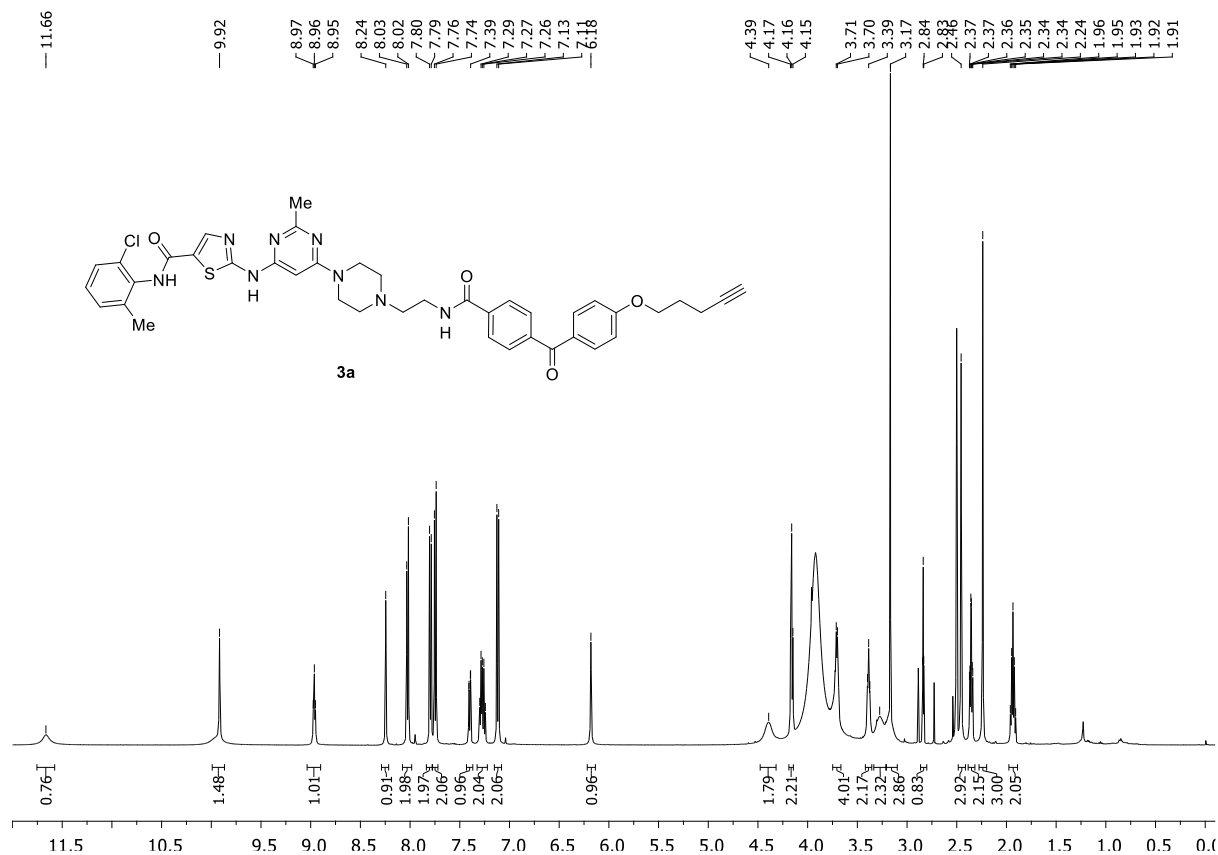

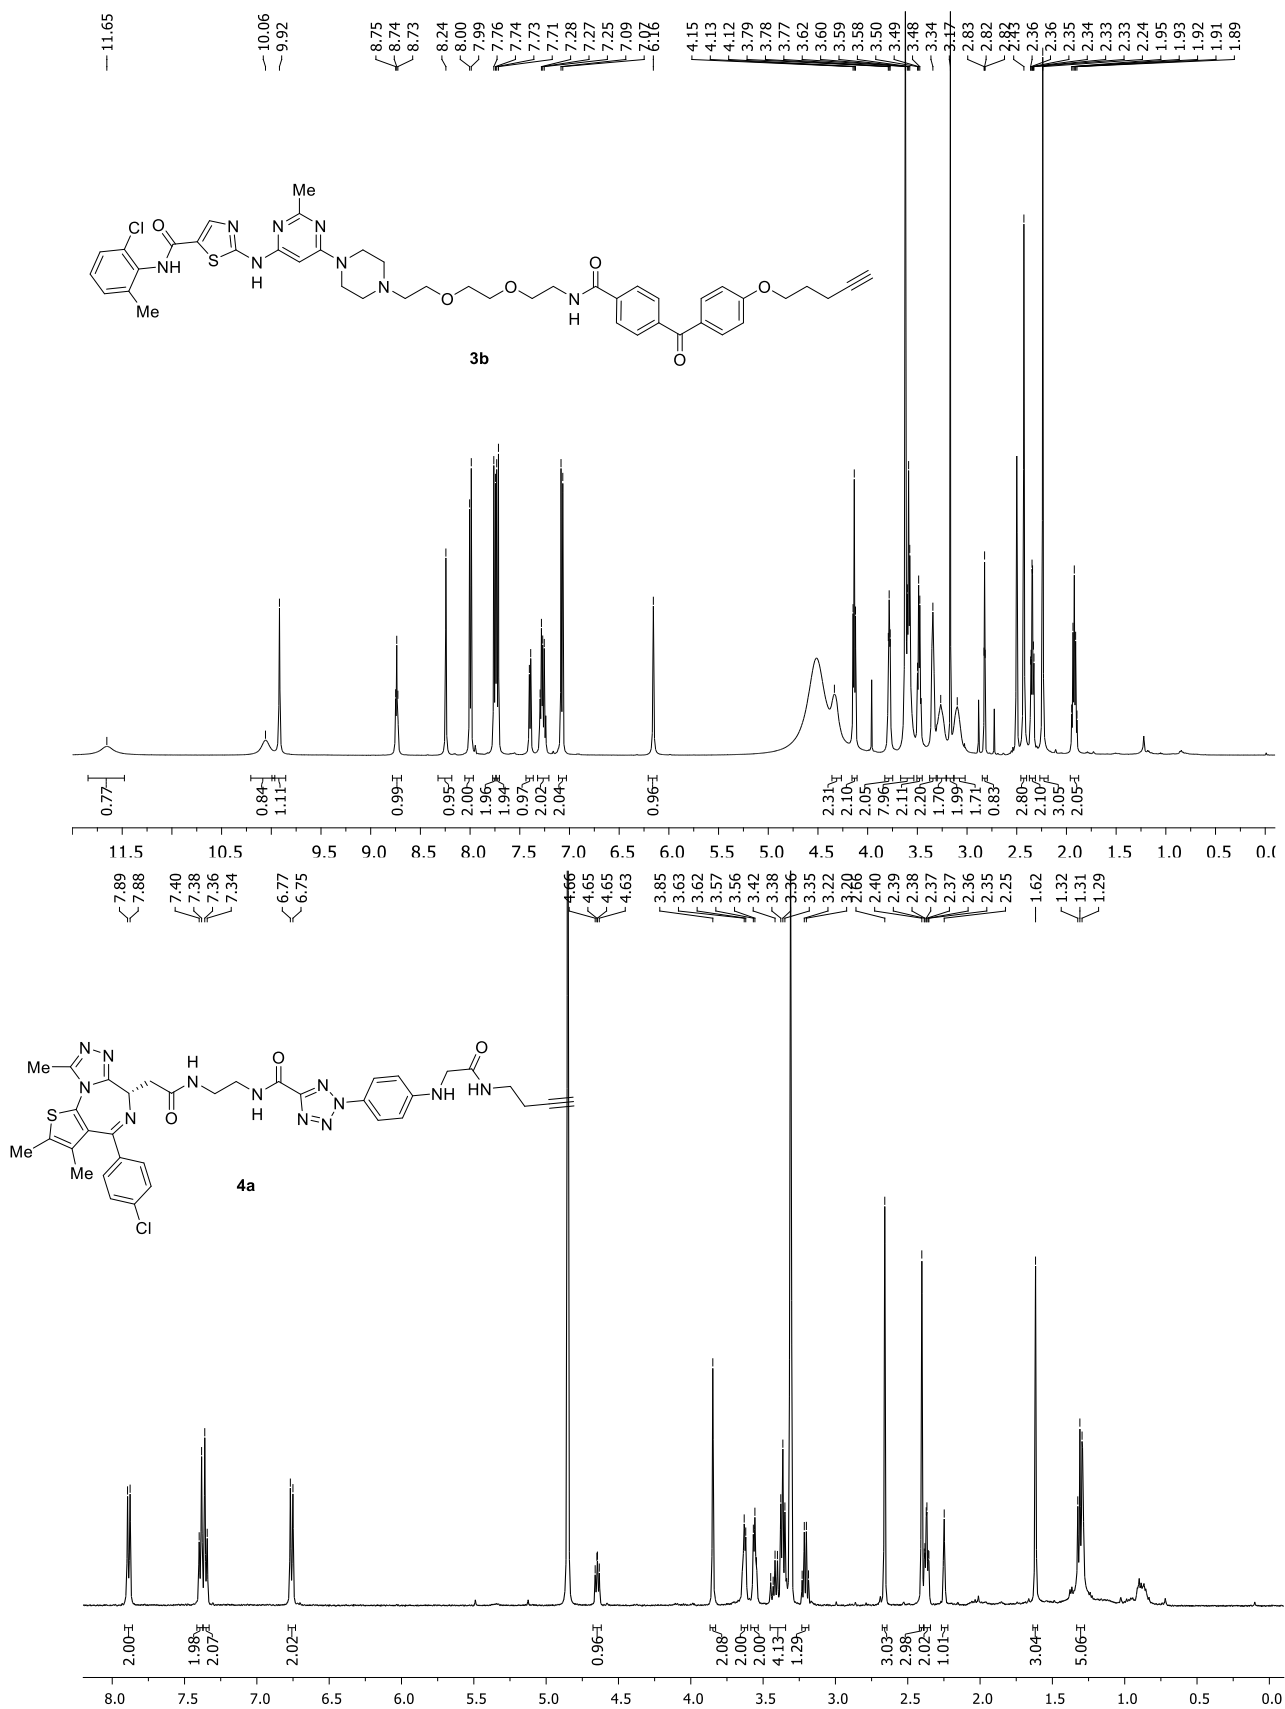

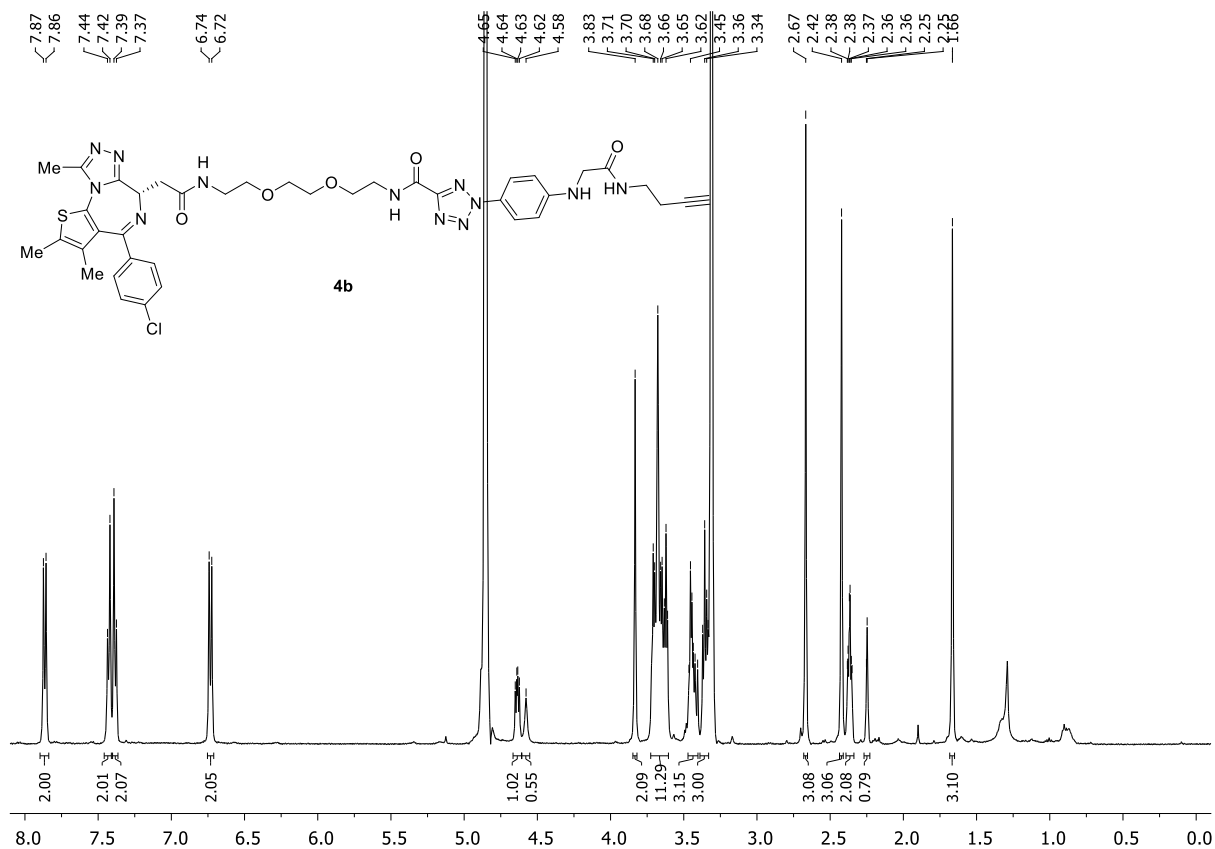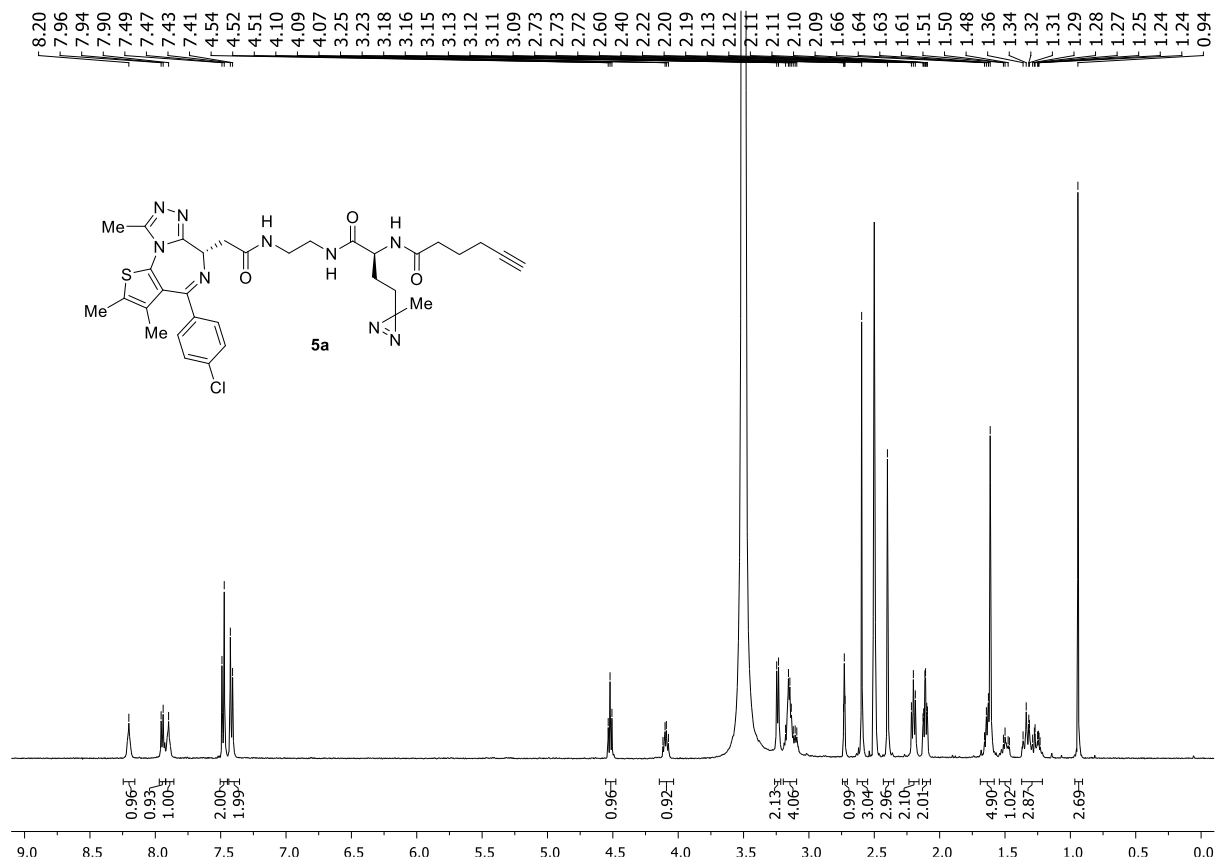

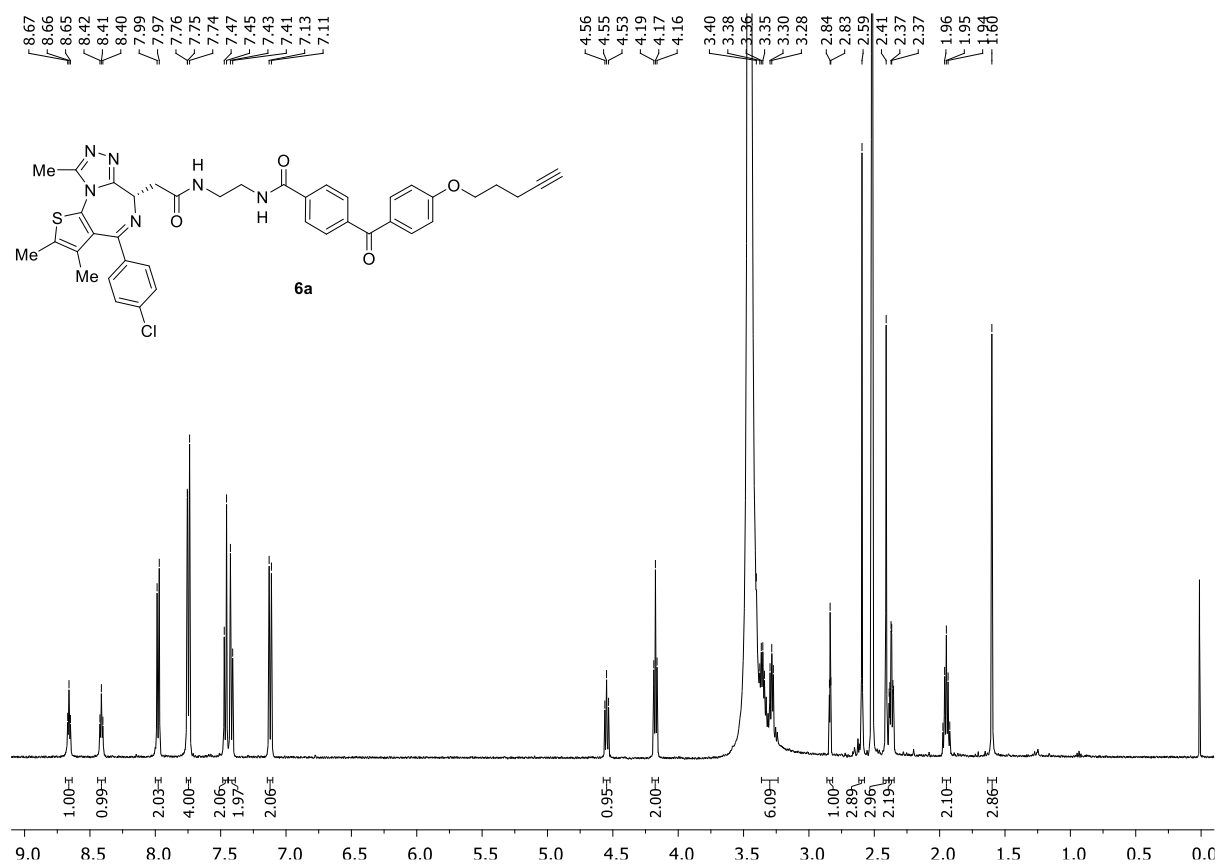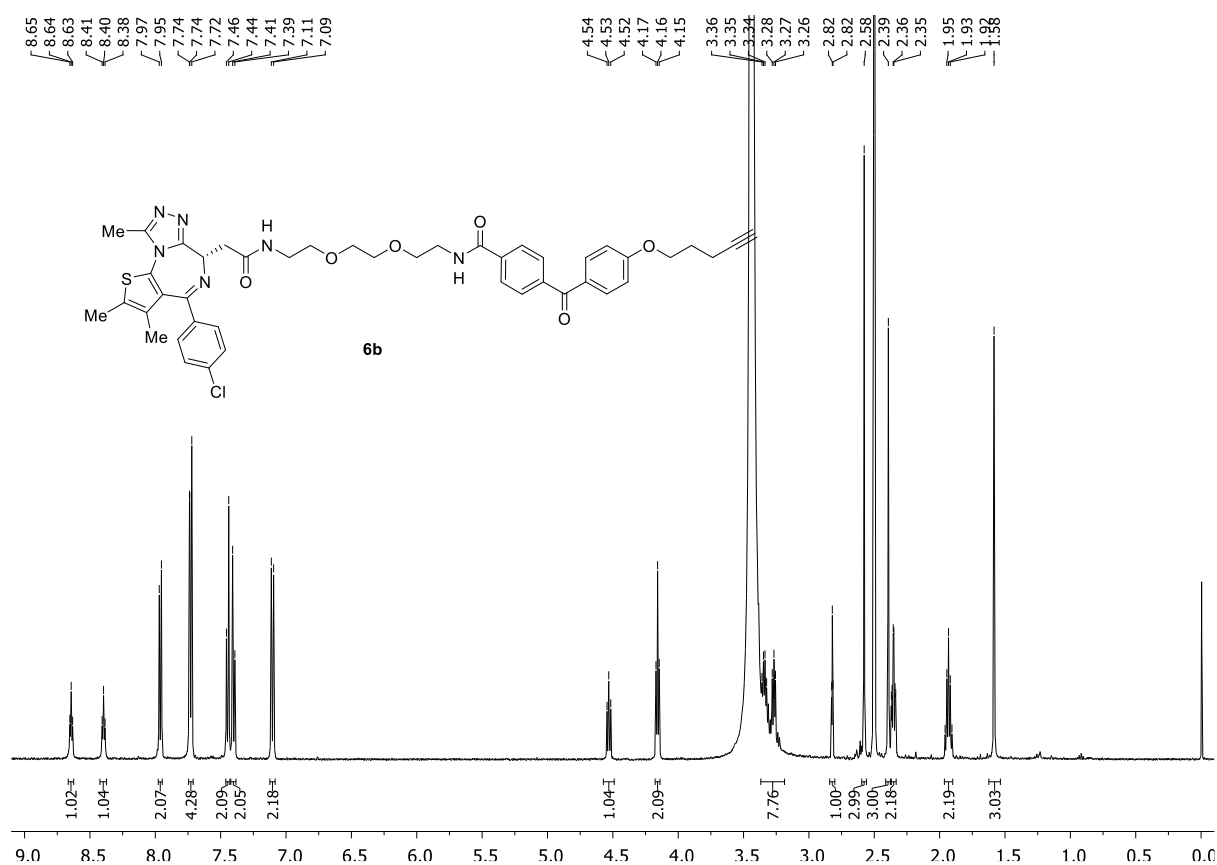

Supplement: ja6b06645_si_001.pdf [file ja6b06645_si_001.pdf]
